# Supplementary material for: Large-Scale Quantitative Proteomic Analysis during Different Stages of Somatic Embryogenesis in Larix olgensis
Source: MDPI journal article supplement (doi:10.3390/cimb45030130), 2023-03-01
Supplement: s1 [file s1]

# Supplementary data (Figure)

## Description

1. Quality control validation of Mass Spectrometer (MS) data was shown in Figure S1.
2. Principal component analysis (PCA) was shown in Figure S2.
3. The TF families identified in the different developmental stages are shown in Figure S3.

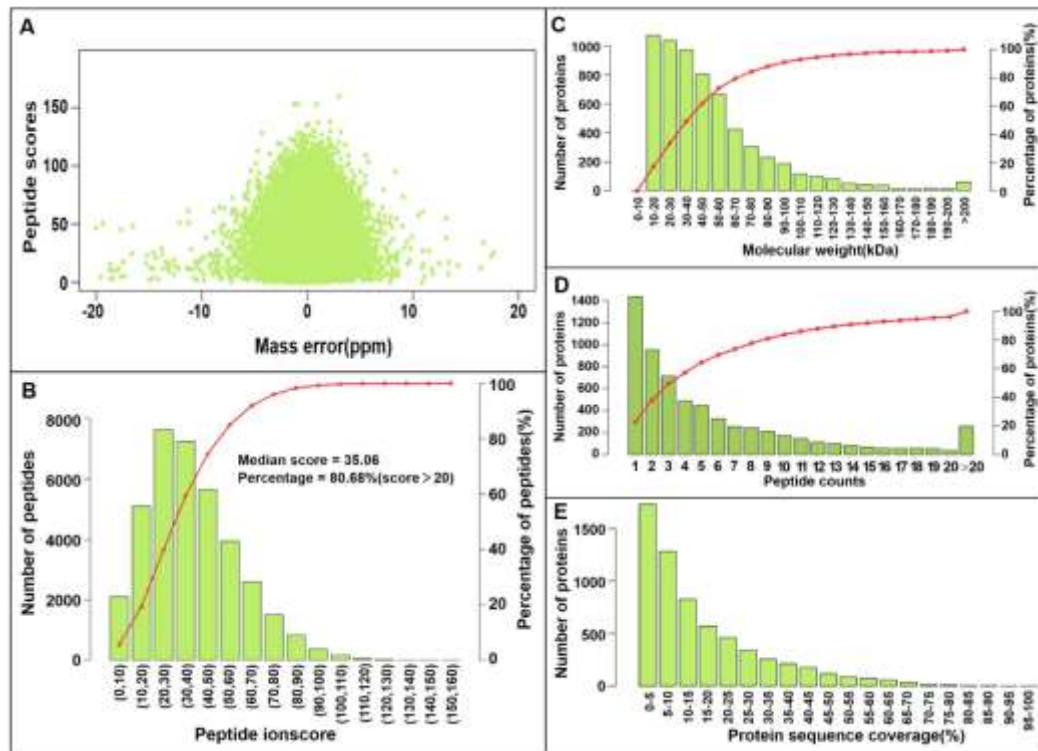

**Figure S1.** Quality control validation of MS data. (A) Mass error distribution; (B) Peptide ionScore distribution; (C) Protein molecular weight distribution; (D) Peptide count distribution; (E) Protein sequence coverage distribution.

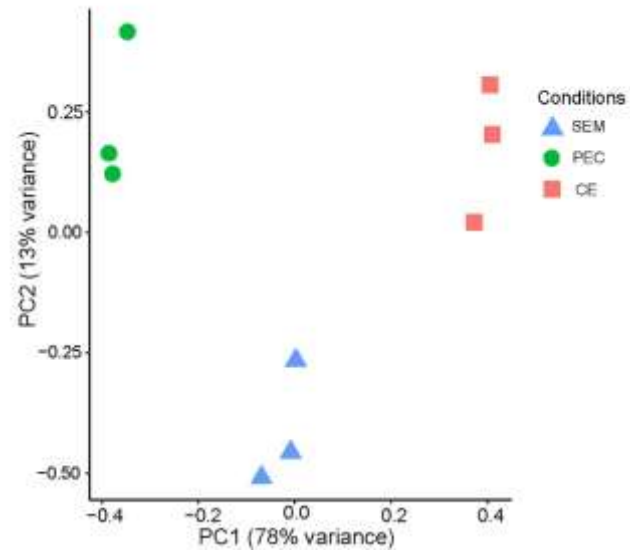

**Figure S2.** PCA plots from the whole proteomics of three stages of SE.

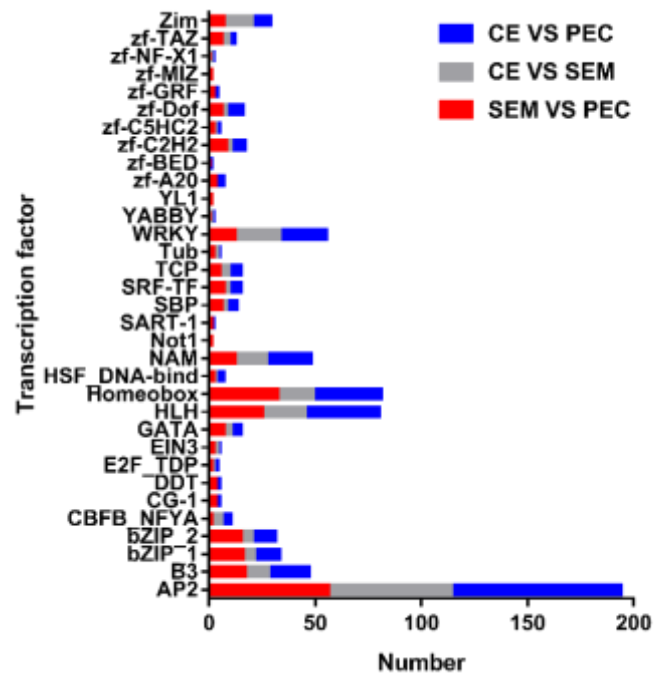

**Figure S3.** TFs identified in different stages of SE in *L. olgensis*.
