# Supplementary material for: Large-Scale Quantitative Proteomic Analysis during Different Stages of Somatic Embryogenesis in Larix olgensis
Source: Curr Issues Mol Biol. 2023 Mar 1;45(3):2021–34. doi: 10.3390/cimb45030130 (PMC10047913; doi:10.3390/cimb45030130)
Supplement: Supplementary file 1 [file cimb-45-00130-s001.zip]

Archive with 5 entries (5 files):
- Supplementary material-Figure.pdf
- Table S1-List of primers used for RT-qPCR2.22.xlsx
- Table S2-Details of identified proteins.xlsx
- Table S3-Details of hierarchical cluster analysis of DEPs.xlsx
- Table S4-Correlation analyses.xlsx
