# Supplementary material for: Large-Scale Quantitative Proteomic Analysis during Different Stages of Somatic Embryogenesis in Larix olgensis
Source: Curr Issues Mol Biol. 2023 Mar 1;45(3):2021–34. doi: 10.3390/cimb45030130 (PMC10047913; doi:10.3390/cimb45030130)
Supplement: Supplementary file 1 [file cimb-45-00130-s001.zip › Table S1-List of primers used for RT-qPCR2.22.xlsx]

## Sheet: Table S1
Table S1 List of primers used for RT-qPCR
Primers were generated for real-time quantitative PCR for comparison with TMT quantitative data. Details of Accession, Gene name and Primer sequences are shown.
Accession	Gene name	Primer sequences (5'-3')
TRINITY_DN54015_c0_g1	Peroxidase 12	Forward	TTATCTCACCTGCCCTACCAACAC
		Reverse	TAGGCTCTGGTTCACCGCAAAG
TRINITY_DN48451_c0_g2	Chalcone isomerase (CHI)	Forward	GGCGAATCTCTGAACCAACGAAC
		Reverse	CGGCTCTCTCAAGTCTGGACAG
TRINITY_DN55276_c0_g7	12-oxophytodienoate reductase 3	Forward	ACAGTCCCGAACAGGTGAAAGG
		Reverse	GGAAGGAGAGAACGAGGATGTGG
TRINITY_DN52534_c1_g2	Sugar transporter ERD6-like 6	Forward	CCGAGAAATGTGACACCCCAATATG
		Reverse	TTCCACGAAACCCAGGACACG
TRINITY_DN48680_c0_g2	Homeobox（WOX）	Forward	TTTATGGCGTGGGTAGTTG
		Reverse	CACCCGTTTTCATTTCTCG
TRINITY_DN53456_c1_g1	ADP, ATP carrier protein 1	Forward	CCGTCCAGCATGAAACGCAATC
		Reverse	AGCGAACGAGGAAGAAGGATAACC
TRINITY_DN54232_c0_g3	Plasma membrane ATPase 1	Forward	GCATGTGGAGCCTGAATAAACCC
		Reverse	TGGACGGTGGAGTGAAGAAGATG
TRINITY_DN53379_c0_g4	Alpha-glucan phosphorylase	Forward	ATGCTTCTACTGGGCTGGCTTC
		Reverse	TCCCTCTCAAGGTTTGCGGTTC
TRINITY_DN52925_c0_g1	Acyl-coenzyme A oxidase 3	Forward	GAGCATGTGGTCGCAGTTCATTAC
		Reverse	TGAATTGGCGGAGGACTTGGG
TRINITY_DN52580_c0_g7	4-alpha-glucanotransferase DPE2	Forward	GTGGGAAGAGGATGAGGGAAGAC
		Reverse	CTCAGTTGCTGGGCGTTTGC
Reference gene	EF1A1	Forward	CGTGGTTATGTGGCATCTGATTCC
		Reverse	CATCTTGACAAACCCAGCATCTC
