# Supplementary material for: Large-Scale Quantitative Proteomic Analysis during Different Stages of Somatic Embryogenesis in Larix olgensis
Source: Curr Issues Mol Biol. 2023 Mar 1;45(3):2021–34. doi: 10.3390/cimb45030130 (PMC10047913; doi:10.3390/cimb45030130)
Supplement: Supplementary file 1 [file cimb-45-00130-s001.zip › Table S2-Details of identified proteins.xlsx]

## Sheet: Table S2
Table S2 Details of identified proteins
Accession	Coverage	Unique peptides	MW [kDa]	pI (isoelectric point)	SEM/PEC ratio	SEM/PECP value	CE/SEM ratio	CE/SEM P value	CE/PEC ratio	CE/PEC P value
TRINITY_DN54118_c3_g2	69.48	29	71.2513	5.18604	1.02812	0.427005	0.694047	0.000588591	0.713561	0.000171858
TRINITY_DN53561_c1_g1	71.1	17	32.7437	7.32764	1.01937	0.717125	1.20053	0.0133391	1.22379	0.00699885
TRINITY_DN54501_c1_g1	67.98	25	56.4596	6.97607	1.01169	0.382885	1.06098	0.0190224	1.07338	0.00311788
TRINITY_DN45071_c0_g1	62.33	29	54.905	6.93213	1.07749	0.0281504	1.26706	0.000482863	1.36525	0.000370128
TRINITY_DN51519_c3_g1	59.1	35	73.4671	5.77002	0.812592	0.0008404	1.10504	0.0480839	0.897949	0.00995558
TRINITY_DN53500_c1_g1	50.86	22	45.0407	6.02393	1.27465	0.00103782	1.35488	0.000380752	1.727	5.2785e-05
TRINITY_DN51153_c3_g4	56.71	3	43.5509	5.71924	0.723652	0.325302	1.44678	0.12513	1.04696	0.859792
TRINITY_DN51180_c1_g1	57.18	22	49.8094	5.30029	1.00883	0.626211	0.864288	0.000826986	0.87192	0.00141026
TRINITY_DN50358_c1_g1	50.03	73	192.686	5.49072	0.823787	4.59372e-05	0.989802	0.469732	0.815386	0.000131927
TRINITY_DN51153_c3_g1	57.48	1	32.7427	5.68115	0.699734	0.0433348	1.02636	0.84273	0.718177	0.00823054
TRINITY_DN50522_c2_g4	60.69	8	54.4226	5.14795	0.983932	0.789832	0.824106	0.0324207	0.810864	0.00102075
TRINITY_DN51658_c0_g1	53.37	55	109.84	6.46826	1.35047	0.00155802	1.54018	0.000375028	2.07996	4.92911e-05
TRINITY_DN53861_c0_g1	61.74	32	59.5512	4.86865	0.834766	0.000650782	1.08447	0.0139402	0.905277	0.0053424
TRINITY_DN49894_c0_g2	58.7	34	54.9359	4.97021	1.27902	0.000307439	1.14358	0.00563019	1.46266	0.000247138
TRINITY_DN55652_c2_g1	62.65	11	37.0097	4.83057	1.22148	0.0115471	1.9861	6.54093e-05	2.42598	1.02506e-05
TRINITY_DN50028_c1_g2	68.38	1	13.2261	9.90576	0.993536	0.922498	0.971483	0.689148	0.965203	0.479265
TRINITY_DN54515_c2_g6	55.45	37	81.8147	5.46533	1.12252	0.0181799	1.11546	0.00843442	1.25212	0.000187958
TRINITY_DN51153_c3_g3	61.4	2	25.1378	5.33838	0.834999	0.0601939	0.990217	0.906597	0.82683	0.000544712
TRINITY_DN50672_c2_g3	68.44	34	59.3172	6.41748	0.931983	0.0187896	1.13291	0.0420902	1.05585	0.278745
TRINITY_DN51557_c0_g2	68.29	19	32.6406	6.41748	1.14599	0.0145865	1.17774	0.000226188	1.34967	0.000713351
TRINITY_DN50693_c0_g1	67.5	12	17.455	5.37646	1.62712	9.30613e-05	1.63489	0.000221433	2.66016	3.85324e-05
TRINITY_DN51790_c1_g2	73.47	27	36.339	4.99561	0.78874	0.00335086	1.18912	0.00541962	0.937903	0.19945
TRINITY_DN46082_c0_g2	22.76	1	27.0997	9.77393	0.939001	0.73793	1.25894	0.134474	1.18215	0.235514
TRINITY_DN50123_c0_g1	53.69	24	44.5502	10.3452	1.01545	0.704562	0.939252	0.204984	0.953764	0.0512338
TRINITY_DN55807_c1_g1	65.91	19	63.2488	6.20166	0.737186	0.00213732	1.01229	0.531528	0.746249	0.00298678
TRINITY_DN54762_c0_g1	54.09	41	93.5113	6.29053	1.02631	0.622242	1.01162	0.742381	1.03824	0.413459
TRINITY_DN49914_c0_g1	50.4	46	111.397	7.02002	0.768158	0.0312924	1.33351	0.00657384	1.02435	0.791876
TRINITY_DN53244_c1_g1	55.97	24	49.3202	7.1958	1.08542	0.0835854	0.981085	0.348649	1.06489	0.180041
TRINITY_DN51495_c1_g2	34.58	50	163.485	6.23975	1.22737	0.0101141	0.827992	0.000820887	1.01625	0.752753
TRINITY_DN51369_c3_g3	49.34	33	77.4393	5.45264	0.687666	0.00190461	1.12267	0.0517812	0.772022	0.00998674
TRINITY_DN53308_c1_g2	60.72	15	48.9046	9.02686	1.13346	0.00616178	0.956553	0.228219	1.08421	0.0624648
TRINITY_DN54502_c0_g1	25.19	13	70.1113	6.34131	0.471147	0.00043986	0.665345	0.0297035	0.313475	1.36224e-06
TRINITY_DN53326_c0_g1	63.19	33	57.4046	5.63037	1.08263	0.00276639	1.02151	0.519117	1.10591	0.0274219
TRINITY_DN48194_c0_g1	73.2	38	67.4174	6.29053	0.768344	0.000118044	0.81574	5.57717e-06	0.626769	1.63334e-05
TRINITY_DN52889_c0_g2	62.05	27	57.533	6.30322	0.793359	0.00895736	1.52835	0.000274592	1.21253	0.00303965
TRINITY_DN55061_c4_g1	29.98	26	104.353	6.3667	1.10276	0.12573	1.08406	0.120916	1.19546	0.0137442
TRINITY_DN52121_c3_g2	65.68	40	64.6178	5.14795	0.680288	0.000189012	0.997502	0.928136	0.678588	0.000331706
TRINITY_DN50460_c1_g1	55.71	16	39.3232	9.29053	0.984074	0.689106	0.913862	0.0821278	0.899307	0.0151912
TRINITY_DN45342_c0_g1	55.43	24	48.0972	8.19189	0.946485	0.0212221	1.10816	0.00641615	1.04885	0.0553284
TRINITY_DN52132_c0_g1	60.08	29	57.3239	5.52881	1.53244	0.00105225	1.08438	0.156906	1.66175	0.000165728
TRINITY_DN41596_c0_g1	50.47	29	69.6373	5.42725	0.940963	0.0384756	0.953354	0.047911	0.897071	0.0141494
TRINITY_DN50522_c2_g2	56.29	31	73.8819	5.05908	0.828469	0.00205457	1.01422	0.731312	0.840249	0.00350099
TRINITY_DN51025_c0_g1	57.37	6	35.0246	6.44287	0.991301	0.896059	0.714134	0.0030478	0.707923	0.00450044
TRINITY_DN49762_c2_g1	79.6	36	44.8602	5.5415	1.0583	0.302773	1.1314	0.0228689	1.19737	0.0150146
TRINITY_DN50376_c2_g1	57.25	39	77.4711	5.05908	0.919711	0.00330604	0.909889	0.00748536	0.836835	0.0005167
TRINITY_DN46966_c0_g1	88.95	13	18.7299	4.81787	0.995077	0.873457	1.2593	0.000528907	1.2531	6.38582e-05
TRINITY_DN52317_c0_g4	49.91	19	61.9439	6.50732	1.13431	0.00399657	1.01295	0.776334	1.14899	0.0324668
TRINITY_DN51104_c0_g1	64.74	6	17.8075	9.72998	0.935046	0.169526	0.998267	0.970746	0.933426	0.0281075
TRINITY_DN55067_c0_g4	21.83	55	285.334	7.18115	1.02574	0.279674	0.949287	0.0799423	0.973723	0.289322
TRINITY_DN48750_c0_g1	64.35	31	58.9487	9.37842	1.31565	0.00247526	1.31971	0.000428932	1.73628	2.65098e-05
TRINITY_DN50003_c2_g2	61.9	24	53.2362	6.58057	1.22543	0.0224859	1.58013	0.000496284	1.93634	5.78779e-05
TRINITY_DN51790_c0_g1	75.44	19	30.7573	6.0874	0.710186	0.000151642	1.0399	0.277598	0.738521	0.000347504
TRINITY_DN49046_c0_g1	67.48	15	41.9638	7.45947	0.902227	0.00322101	0.869923	0.00581856	0.784869	0.000785937
TRINITY_DN54277_c0_g1	55.75	26	54.5103	5.31299	1.04258	0.0473964	1.00259	0.837876	1.04528	0.0391685
TRINITY_DN53295_c4_g1	50.22	31	71.7642	7.81104	0.92781	0.208938	0.939929	0.199879	0.872076	0.0158617
TRINITY_DN50013_c2_g8	47.24	3	14.3871	11.3999	1.94586	0.078446	0.927202	0.747678	1.80421	0.00638853
TRINITY_DN50522_c1_g1	59.23	10	31.5306	8.27979	0.728143	0.000236202	1.09596	0.0378642	0.798012	0.000187569
TRINITY_DN53308_c1_g3	67.92	7	32.0968	9.24658	1.05953	0.3574	1.07341	0.0810554	1.13731	0.0898377
TRINITY_DN54923_c0_g2	59.94	18	35.2037	6.78564	0.982163	0.73641	1.20191	0.00798895	1.18047	0.00727287
TRINITY_DN54232_c0_g2	38.94	15	95.1468	6.13818	1.13806	0.00726864	0.8739	0.00260839	0.994552	0.823607
TRINITY_DN50986_c0_g4	52.77	36	92.4787	6.15088	1.16044	0.0177935	1.16064	0.00906135	1.34685	3.45981e-05
TRINITY_DN56012_c2_g3	75.4	10	20.0156	5.23682	0.808473	0.00743023	1.29373	0.00142019	1.04594	0.3749
TRINITY_DN51879_c2_g3	45.23	44	107.918	6.55127	1.03702	0.311979	0.821564	0.00745567	0.851975	0.0176373
TRINITY_DN50966_c2_g2	39.18	33	106.738	6.88818	1.27999	0.000766641	0.873684	0.0080582	1.1183	0.00444538
TRINITY_DN55072_c0_g2	53.07	11	42.6968	6.34131	1.11874	0.146758	1.04351	0.488394	1.16742	0.00570215
TRINITY_DN56062_c3_g1	18.76	61	398.845	5.24951	1.14705	0.00756719	0.989537	0.567217	1.13505	0.00890603
TRINITY_DN52171_c0_g1	54.69	28	54.4568	4.93213	1.44151	0.000819785	1.03121	0.355327	1.4865	0.00018641
TRINITY_DN49532_c0_g1	46.29	35	90.9114	5.41455	1.11414	0.0348684	0.779516	8.30747e-05	0.868487	0.0203352
TRINITY_DN50016_c1_g1	54.62	2	27.065	6.39209	0.818403	0.0442324	0.815554	0.0166783	0.667452	0.0045129
TRINITY_DN55440_c2_g1	28.45	2	50.5876	5.35107	1.14939	0.179128	1.67415	0.0010085	1.92425	0.000231118
TRINITY_DN52853_c1_g1	65.79	22	33.0343	6.40479	2.52714	5.64114e-05	3.32899	5.08727e-05	8.41283	1.95909e-05
TRINITY_DN52872_c2_g1	52.34	24	51.9364	6.26514	0.95502	0.0105518	1.26404	0.00253493	1.20719	0.00526743
TRINITY_DN55206_c1_g2	74.94	23	47.3163	8.04541	1.01405	0.714469	0.811916	7.96482e-06	0.823328	0.00747017
TRINITY_DN54546_c0_g3	56.74	1	15.5326	10.0522	1.34799	0.0500091	0.742907	0.0437527	1.00143	0.981429
TRINITY_DN53500_c0_g1	54.48	25	60.0493	6.56592	0.894833	0.0731227	0.992578	0.866113	0.888192	0.029667
TRINITY_DN50013_c1_g1	58.25	3	11.4024	11.4731	1.97892	0.0376008	1.0148	0.93217	2.00821	0.00278273
TRINITY_DN51733_c2_g3	46.1	4	49.5174	5.04639	0.962975	0.799603	0.855737	0.226834	0.824054	0.245044
TRINITY_DN53593_c0_g1	47.45	17	54.9891	6.01123	0.873155	0.00521807	1.02759	0.186958	0.897242	0.01543
TRINITY_DN51860_c2_g1	57.14	1	15.3856	10.0229	0.928064	0.0586279	0.980628	0.526275	0.910085	0.0103785
TRINITY_DN52194_c0_g1	51.98	4	53.0061	4.99561	1.2328	0.0219876	0.739489	0.00745695	0.91164	0.131598
TRINITY_DN46820_c0_g1	53.67	7	36.8984	8.646	0.559344	0.00408895	0.985317	0.860505	0.551131	0.00263351
TRINITY_DN53804_c1_g4	59.26	1	14.8083	10.0522	1.29907	0.00792568	0.679638	0.000308766	0.882897	0.124479
TRINITY_DN48188_c0_g2	52.53	14	34.7874	7.6499	0.956221	0.337366	0.952211	0.360908	0.910525	0.0148548
TRINITY_DN44920_c0_g1	39.92	34	86.4362	8.19189	0.884513	0.00985127	1.02249	0.312233	0.904406	0.0278896
TRINITY_DN49664_c0_g1	71.74	18	29.7966	8.90967	0.729254	0.00517003	1.69899	0.00207254	1.239	0.0415411
TRINITY_DN51113_c3_g1	57.88	27	45.2215	5.31299	0.903829	0.00997937	1.11715	0.0225575	1.00971	0.783649
TRINITY_DN51024_c0_g3	50.22	19	51.1727	7.07861	1.04655	0.253513	1.10342	0.0736065	1.15479	0.0103192
TRINITY_DN53379_c0_g4	37.56	28	95.6807	7.02002	2.30984	0.000456261	1.76485	0.000237608	4.07652	1.51068e-06
TRINITY_DN52033_c1_g2	63.52	40	79.2991	8.48486	0.922091	0.00770869	0.8928	0.00628589	0.823242	0.00114043
TRINITY_DN51519_c3_g3	43.86	18	73.628	6.06201	0.446036	0.000367092	0.68697	0.00283493	0.306413	0.00011449
TRINITY_DN55243_c2_g1	48.63	13	51.4688	5.88428	0.577934	9.26352e-05	0.464857	9.42426e-05	0.268656	3.88629e-06
TRINITY_DN54868_c0_g6	40.99	3	60.2252	4.95752	1.04515	0.137486	0.569829	0.000529533	0.595558	0.000622255
TRINITY_DN53500_c1_g4	54.02	20	53.2822	6.32861	0.80859	0.0054456	1.09469	0.0195143	0.885157	0.0460938
TRINITY_DN52802_c0_g2	66.8	25	52.6012	7.00537	1.06648	0.392888	1.19574	0.0539717	1.27523	0.0535509
TRINITY_DN53071_c1_g2	61.39	22	49.9463	8.1333	0.884187	0.0117988	1.09747	0.00781699	0.970368	0.371461
TRINITY_DN54714_c1_g1	46.49	28	88.182	5.70654	1.12481	0.0357029	1.02587	0.391511	1.1539	0.0124407
TRINITY_DN49261_c2_g5	47.66	2	35.8292	5.5542	0.972673	0.794391	1.52574	0.0154254	1.48404	0.0333221
TRINITY_DN45099_c0_g1	43.78	25	66.5543	6.75635	0.744515	0.00512091	1.06355	0.229004	0.791825	0.0082232
TRINITY_DN51630_c0_g5	48.36	27	64.2599	6.18896	0.950162	0.11167	1.08923	0.00525973	1.03494	0.244094
TRINITY_DN51069_c1_g3	40.47	24	115.523	6.90283	1.06603	0.00166922	1.10685	0.000519164	1.17994	5.20225e-05
TRINITY_DN50104_c0_g1	65.57	15	31.9624	8.90967	1.01292	0.782104	0.892095	0.003109	0.903625	0.0963395
TRINITY_DN55483_c0_g1	20.56	53	298.153	5.18604	1.44646	8.90518e-05	0.86701	0.00101288	1.2541	0.00172971
TRINITY_DN49106_c2_g1	66.1	18	38.5672	8.44092	1.03157	0.364799	0.841845	0.0028316	0.868425	0.0228198
TRINITY_DN49747_c1_g1	40.17	40	109.321	5.50342	1.04621	0.102783	0.949622	0.0367593	0.993509	0.703237
TRINITY_DN49197_c3_g1	64.2	4	17.4176	10.0229	1.09438	0.422836	0.737058	0.0439669	0.806622	0.0265687
TRINITY_DN55562_c1_g1	37.61	34	97.9455	5.74463	1.32377	0.00112834	0.930767	0.0751544	1.23212	0.00032117
TRINITY_DN46469_c0_g1	37.53	30	89.229	5.8335	0.927019	0.0294927	0.975159	0.337067	0.903991	0.00586303
TRINITY_DN52397_c0_g2	61.8	16	48.5283	6.7124	1.00511	0.916863	1.00739	0.866573	1.01253	0.741813
TRINITY_DN49725_c0_g1	41.52	28	77.8801	8.99756	1.17715	0.00601988	1.11241	0.0118077	1.30947	0.000279922
TRINITY_DN54010_c2_g2	44.11	16	45.0618	9.83252	1.01854	0.36985	0.718683	7.83658e-05	0.732008	1.58867e-05
TRINITY_DN55937_c2_g5	28.45	5	26.08	4.84326	0.857017	0.00707224	1.33029	0.00289438	1.14008	0.0362345
TRINITY_DN54298_c0_g1	50.93	21	59.2588	4.88135	1.10116	0.0322052	0.906959	0.0159306	0.998704	0.967447
TRINITY_DN49437_c3_g1	57.31	26	57.3533	7.04932	0.843783	0.000481703	1.33495	6.29772e-05	1.12641	0.0041143
TRINITY_DN54043_c2_g1	46.2	38	94.7272	6.50732	1.03226	0.224179	1.14338	0.00286321	1.18026	0.000867835
TRINITY_DN46795_c0_g1	66.8	18	28.0506	10.6968	1.07613	0.00945264	0.93003	0.0259942	1.00083	0.976795
TRINITY_DN32281_c0_g1	63.98	3	17.2585	10.0229	0.801441	0.00941436	0.721776	0.00739844	0.57846	0.000104554
TRINITY_DN51881_c0_g1	72.38	21	37.1773	5.93506	1.12636	0.00026549	0.75366	2.53589e-05	0.84889	0.000411917
TRINITY_DN52572_c1_g1	70.85	8	21.7963	5.17334	1.16271	0.00450725	1.44168	0.000500222	1.67626	8.93969e-05
TRINITY_DN50722_c4_g4	31.2	36	136.446	5.96045	1.04013	0.395215	1.05101	0.212208	1.09319	0.01459
TRINITY_DN44765_c0_g1	52.1	21	51.4764	7.97217	1.19429	0.0568737	0.842626	0.00430592	1.00634	0.931662
TRINITY_DN50405_c2_g1	38.4	22	65.9775	8.80713	1.03628	0.622797	1.18587	0.0446818	1.22889	0.00801229
TRINITY_DN53804_c1_g6	65.57	3	13.2995	10.1548	1.19722	0.00646147	0.79356	0.00125859	0.950063	0.10175
TRINITY_DN55322_c1_g2	43.34	19	64.9986	5.47803	1.00121	0.94309	0.965687	0.227693	0.966854	0.224326
TRINITY_DN51630_c0_g1	61.86	13	31.6222	5.5415	0.831099	0.0608639	1.21387	0.009074	1.00884	0.887737
TRINITY_DN46861_c0_g1	49.47	22	61.2964	6.97607	0.901775	0.00380257	0.943585	0.0565188	0.850901	0.000205253
TRINITY_DN48010_c0_g1	35.24	6	36.462	8.646	1.01991	0.842941	1.40098	0.00468445	1.42887	0.00254684
TRINITY_DN55211_c1_g3	54.43	13	51.8586	5.59229	0.444239	0.000544012	0.88116	0.0261508	0.391446	0.000412316
TRINITY_DN55364_c2_g2	66.46	14	34.4171	5.43994	0.654465	3.35191e-05	1.32852	2.97691e-05	0.869467	0.00165528
TRINITY_DN49229_c1_g5	60.54	19	29.6998	9.71533	1.04698	0.0763266	0.93084	0.04552	0.97457	0.334387
TRINITY_DN49843_c0_g2	55.4	2	15.7215	10.3452	0.950713	0.132067	1.1175	0.0273738	1.06242	0.0529631
TRINITY_DN49799_c3_g1	34.56	23	53.9142	5.40186	0.937897	0.0611523	1.1099	0.00724864	1.04097	0.22411
TRINITY_DN52551_c2_g6	43.48	3	34.2203	4.76709	0.553074	0.00941403	0.893188	0.291865	0.493999	0.00353722
TRINITY_DN49139_c3_g3	52.66	26	59.7655	7.82568	1.26472	0.000305482	0.752848	0.000248539	0.95214	0.102675
TRINITY_DN48694_c0_g1	64.1	37	66.8514	8.68994	1.11223	0.0124403	0.79568	0.000467378	0.884983	0.00750352
TRINITY_DN48568_c0_g1	45.25	26	63.5088	9.0708	1.01106	0.691233	0.814161	0.00151222	0.823162	0.00208621
TRINITY_DN49453_c3_g3	39.72	35	112.809	6.34131	0.951101	0.378429	0.997147	0.952239	0.948387	0.129849
TRINITY_DN54576_c1_g2	38.94	25	84.9758	5.47803	0.854791	0.000940584	0.95012	0.0202376	0.812154	0.000383391
TRINITY_DN54835_c1_g10	67.35	3	16.0115	4.97021	0.804541	0.187156	0.934061	0.553705	0.751491	0.0583245
TRINITY_DN50810_c3_g1	53.92	17	35.725	9.5542	0.998125	0.967766	0.864716	0.0191164	0.863095	0.0606557
TRINITY_DN53483_c0_g1	37.42	18	101.615	6.80029	1.33925	0.00272715	0.828737	0.00113558	1.10989	0.0752482
TRINITY_DN50221_c0_g1	63.08	8	14.7709	10.1841	0.879842	0.550887	1.36154	0.107825	1.19794	0.332194
TRINITY_DN54771_c4_g6	27.83	32	132.702	8.1626	2.99326	0.000130009	1.05658	0.31118	3.16263	2.39739e-06
TRINITY_DN51183_c1_g2	46.92	20	59.4352	6.72705	1.19142	0.000800431	0.944977	0.0510391	1.12587	0.00284125
TRINITY_DN49234_c0_g1	51.92	13	39.5823	5.75732	1.11872	0.0724185	1.40908	0.000592713	1.57637	0.000382949
TRINITY_DN52381_c1_g3	51.89	1	24.3556	5.16064	1.16573	0.228947	0.68848	0.025148	0.802583	0.0507843
TRINITY_DN51540_c2_g1	64.38	14	25.0926	5.36377	1.13002	0.14502	1.15977	0.0327927	1.31056	0.00744723
TRINITY_DN51973_c2_g1	57.65	23	47.3664	5.07178	1.12475	0.0129711	1.00062	0.984176	1.12545	0.00748848
TRINITY_DN50257_c1_g5	58.08	18	21.8621	9.39307	3.21933	3.93138e-06	2.57838	5.2367e-05	8.30068	1.2197e-05
TRINITY_DN52496_c0_g1	39.34	16	47.055	7.10791	1.13976	0.0209173	0.86617	0.00504112	0.987226	0.783693
TRINITY_DN53179_c1_g1	34.67	23	74.0801	5.65576	1.3463	0.00753622	0.914051	0.128883	1.23059	0.00562697
TRINITY_DN52433_c2_g2	53.08	17	41.2909	8.11865	0.792813	0.000373727	1.05896	0.120006	0.839557	0.00155307
TRINITY_DN45690_c0_g1	26.32	28	132.548	7.12256	0.993197	0.74888	0.985511	0.487222	0.978807	0.384008
TRINITY_DN54236_c1_g1	76.06	5	15.4272	9.20264	0.911229	0.0334077	0.786209	0.00233412	0.716416	1.24589e-05
TRINITY_DN50464_c0_g1	33.39	17	62.6765	6.48096	0.928209	0.0101856	0.959124	0.0664897	0.890268	0.00526307
TRINITY_DN48707_c3_g2	26.19	46	188.339	5.96045	0.765391	6.09983e-05	0.897491	0.00188653	0.686932	2.99811e-05
TRINITY_DN47541_c1_g1	32.56	12	42.3286	6.41748	0.958233	0.403952	1.25176	0.00592673	1.19948	0.00384177
TRINITY_DN46391_c0_g1	40.83	31	70.3271	8.52881	0.748416	9.03464e-05	1.01095	0.619301	0.756614	1.41109e-05
TRINITY_DN54835_c1_g14	35.65	1	25.3151	4.79248	1.25885	0.0661673	1.3027	0.0147043	1.6399	0.000238889
TRINITY_DN51833_c0_g1	40.49	21	63.298	7.04932	0.500321	0.000124105	0.860636	0.00162896	0.430595	7.46506e-05
TRINITY_DN49846_c0_g2	50	11	28.5634	9.42236	1.13589	0.0495385	0.976374	0.400282	1.10905	0.0599381
TRINITY_DN54236_c0_g2	16.56	2	70.8542	5.51611	1.07693	0.147512	1.55715	5.37363e-05	1.67695	5.95872e-05
TRINITY_DN50228_c0_g1	43.58	14	47.4096	8.47021	1.06027	0.191705	0.877961	0.00855636	0.930878	0.19629
TRINITY_DN45601_c0_g1	43.72	39	103.724	7.37158	1.17397	0.0020336	0.959257	0.181794	1.12613	0.00253363
TRINITY_DN46010_c1_g1	37.88	35	111.641	6.58057	1.52333	0.000229567	1.36064	0.0027844	2.07269	0.000143708
TRINITY_DN49934_c4_g1	44.58	23	44.0786	5.33838	0.965677	0.599971	1.28302	0.00182476	1.23898	0.0214985
TRINITY_DN54529_c0_g1	70.14	17	31.9953	8.1333	1.28513	0.0701456	1.93223	0.0112975	2.48318	0.00635696
TRINITY_DN54255_c1_g1	44.14	11	49.7759	5.75732	1.01114	0.711149	1.01631	0.317158	1.02763	0.364683
TRINITY_DN52497_c1_g2	47.05	18	47.837	4.7417	1.93167	7.86782e-05	1.07043	0.0647899	2.06771	7.12239e-07
TRINITY_DN51189_c0_g1	52.96	16	30.2884	9.93506	1.0208	0.309079	0.972226	0.163714	0.992452	0.482042
TRINITY_DN50042_c3_g3	72.85	6	16.2696	10.4478	1.072	0.129435	0.909563	0.0122627	0.975049	0.528869
TRINITY_DN47497_c0_g1	43.74	25	62.2262	7.85498	0.874993	0.00433632	1.0668	0.0773729	0.933441	0.0340104
TRINITY_DN45409_c0_g1	59.38	17	37.6622	6.16357	0.936648	0.166842	0.949807	0.144918	0.889635	0.0200595
TRINITY_DN52570_c3_g5	45.32	34	93.0619	8.45557	0.759704	0.00752324	0.960693	0.325248	0.729842	0.0033413
TRINITY_DN52918_c1_g1	36.36	30	105.222	5.8208	0.911984	0.0239315	0.88015	0.00718783	0.802683	0.0004502
TRINITY_DN52881_c1_g4	52.09	31	70.4371	9.02686	1.08709	0.134844	1.08271	0.087386	1.177	0.00630607
TRINITY_DN47908_c0_g1	39.85	10	29.4396	6.30322	1.16556	0.00284913	1.10314	0.0178792	1.28577	0.000407345
TRINITY_DN48520_c0_g1	77.09	11	19.6196	6.7417	1.51967	0.000936101	1.32941	0.00284647	2.02027	8.79729e-05
TRINITY_DN49519_c0_g2	45.57	12	44.1799	6.07471	0.437013	0.000263592	0.905206	0.1568	0.395587	0.000168229
TRINITY_DN54769_c0_g2	43.66	24	56.1807	7.00537	1.04253	0.0297222	1.2341	0.00652143	1.28659	0.00344199
TRINITY_DN54232_c0_g1	35.51	10	65.7919	5.33838	1.07318	0.348962	3.03957	5.33035e-06	3.262	5.12948e-06
TRINITY_DN51930_c0_g4	66.58	23	44.6516	8.96826	1.00596	0.727335	1.04247	0.0276601	1.04869	0.0126661
TRINITY_DN47732_c0_g2	45.49	16	53.0185	7.88428	0.973598	0.693209	1.42413	0.000709055	1.38653	0.000971707
TRINITY_DN55906_c1_g1	40.63	38	119.946	9.17334	1.19726	5.14394e-05	0.929072	0.0172787	1.11235	0.00644374
TRINITY_DN52031_c0_g1	67.35	22	38.1075	6.97607	1.2129	0.0310832	0.680334	0.000228023	0.82518	0.0416171
TRINITY_DN49139_c3_g1	36	9	26.4661	7.98682	0.817677	0.00115971	1.40908	0.000210214	1.15217	0.000984462
TRINITY_DN48111_c1_g1	45.8	19	55.3674	4.34814	1.01361	0.875223	0.77801	0.0262082	0.788599	0.0573003
TRINITY_DN48948_c1_g3	25.91	16	84.4996	5.21143	0.684103	6.12761e-05	0.835568	0.000732324	0.571614	2.46027e-05
TRINITY_DN53262_c2_g1	63.94	10	42.6556	5.80811	0.66303	0.00114091	0.645473	0.00142087	0.427967	4.89746e-05
TRINITY_DN52813_c4_g4	35.16	34	101.661	6.97607	0.899584	0.00061209	0.976365	0.289909	0.878323	0.00332037
TRINITY_DN53182_c5_g4	22.41	3	88.7213	6.13818	0.443614	0.000246183	0.925904	0.50996	0.410744	4.54357e-05
TRINITY_DN53058_c2_g3	37.02	9	40.5401	7.73779	0.297046	0.000150869	0.629938	0.0106273	0.187121	6.20916e-05
TRINITY_DN49743_c0_g1	53.17	33	83.9175	5.69385	1.05406	0.194319	0.950698	0.135154	1.00209	0.942485
TRINITY_DN51673_c2_g4	37.41	28	87.5846	6.81494	1.01137	0.863721	0.87985	0.00548525	0.889857	0.16092
TRINITY_DN48788_c1_g3	86.47	3	14.2254	5.03369	1.25423	0.000958856	0.904206	0.29157	1.13409	0.247125
TRINITY_DN54799_c0_g1	35.94	56	170.433	5.26221	1.13203	0.0575421	0.884337	0.0118702	1.00109	0.985026
TRINITY_DN49655_c1_g2	33.57	16	61.266	8.08936	1.21803	0.0701168	0.919723	0.334416	1.12025	0.0015165
TRINITY_DN53380_c0_g1	34.56	1	15.5415	10.0376	3.26819	0.0275186	0.623582	0.140565	2.03798	0.0883167
TRINITY_DN53925_c0_g1	50	24	57.3318	4.729	0.968123	0.141432	1.06691	0.0263325	1.0329	0.0917207
TRINITY_DN52642_c0_g2	50.41	8	26.4135	5.41455	1.10202	0.0261362	1.04886	0.151233	1.15587	3.84476e-05
TRINITY_DN49887_c0_g1	38.57	21	63.4429	6.771	0.96183	0.56924	1.20054	0.0176869	1.15471	0.015909
TRINITY_DN52389_c0_g6	63.92	1	17.714	5.73193	0.705147	0.000938916	0.876275	0.000211612	0.617902	0.000353509
TRINITY_DN48660_c4_g1	50.17	14	32.5143	5.10986	1.36647	0.00227753	1.20343	0.0131513	1.64445	0.000346262
TRINITY_DN52806_c0_g1	57.48	13	23.559	5.30029	1.10563	0.0217111	1.06293	0.128893	1.1752	0.00538981
TRINITY_DN52136_c2_g2	43.9	27	67.5824	7.2251	0.741367	0.000404089	1.03842	0.234686	0.769849	0.000989293
TRINITY_DN55735_c1_g5	48.78	19	49.0788	6.53662	0.969497	0.0453029	1.09571	0.000663364	1.06229	0.0116481
TRINITY_DN52874_c1_g2	27.29	9	49.9847	8.68994	1.29529	0.00935985	1.07626	0.148419	1.39407	0.000861551
TRINITY_DN54338_c1_g3	53.7	14	40.1585	8.07471	0.909596	0.0130903	1.06331	0.0289468	0.967179	0.202551
TRINITY_DN36397_c0_g1	52.98	20	47.1232	6.04932	1.08884	0.0724857	0.978597	0.491911	1.06553	0.0840695
TRINITY_DN50810_c3_g7	40.65	16	61.9276	8.68994	1.06827	0.286016	0.882704	0.0401911	0.942967	0.409149
TRINITY_DN49204_c0_g1	59.77	23	58.9834	7.43018	0.862799	0.0127391	1.13228	0.0124668	0.976929	0.413362
TRINITY_DN55067_c0_g5	36.14	25	100.201	4.93213	0.947171	0.0883873	1.08556	0.00420559	1.02821	0.227556
TRINITY_DN53724_c0_g1	64.63	29	56.1875	9.15869	0.972838	0.782916	1.10642	0.150661	1.07637	0.380362
TRINITY_DN39900_c0_g1	43.26	20	67.1442	6.62451	1.34519	0.000807857	1.17941	0.0104422	1.58652	0.000301384
TRINITY_DN45162_c0_g1	30.29	54	217.12	8.29443	1.08397	0.367069	1.05039	0.544364	1.13859	0.0542007
TRINITY_DN54734_c1_g2	43.17	19	63.4981	6.7417	0.994361	0.732042	0.963565	0.106498	0.958131	0.0909691
TRINITY_DN49400_c0_g1	48.16	22	51.2874	5.21143	0.911167	0.0168075	1.0729	0.0617883	0.977589	0.465233
TRINITY_DN53314_c0_g3	39.77	19	57.8316	9.48096	0.790041	0.000916384	1.08633	0.111855	0.858246	0.0254232
TRINITY_DN51418_c0_g1	44.29	14	40.2538	8.5874	0.476457	7.57901e-05	0.771124	0.000725819	0.367408	3.74842e-05
TRINITY_DN54071_c1_g1	51.99	14	30.4489	5.57959	0.951841	0.234566	1.04672	0.230269	0.996312	0.877211
TRINITY_DN52498_c2_g5	43.18	28	59.0467	6.0874	1.03859	0.137922	1.04912	0.0763666	1.08961	0.0207458
TRINITY_DN50639_c1_g1	47.18	19	48.2809	6.60986	1.27163	0.000126166	1.17551	0.0109943	1.49481	0.000496253
TRINITY_DN51251_c0_g1	51.23	20	54.1055	7.6499	1.77906	0.000511172	1.30451	0.00847293	2.3208	0.000376385
TRINITY_DN41232_c0_g1	54.36	19	49.4523	5.30029	0.754577	0.00123496	0.850196	0.000109758	0.641538	0.000273324
TRINITY_DN54612_c1_g2	59.63	34	47.5997	9.20264	0.719452	0.00015082	0.802249	0.000923634	0.57718	1.77221e-05
TRINITY_DN54263_c0_g1	46.35	15	43.8392	9.27588	1.02214	0.474099	0.955739	0.122079	0.976901	0.347464
TRINITY_DN50836_c1_g1	39.83	22	76.2731	5.85889	0.739976	0.000547745	1.01994	0.548266	0.75473	5.85629e-05
TRINITY_DN52994_c9_g1	58.38	21	42.4499	7.38623	1.65013	0.0152479	1.33755	0.000196582	2.20714	0.00145905
TRINITY_DN53836_c0_g1	60.82	18	29.5051	10.3745	1.05556	0.255859	0.976838	0.589757	1.03111	0.204217
TRINITY_DN55081_c0_g3	23.97	28	136.021	7.34229	0.845766	0.0921959	0.969801	0.655423	0.820225	0.0207671
TRINITY_DN54835_c1_g12	49.33	1	17.4348	4.4751	1.01774	0.711972	0.779708	0.00182011	0.793537	0.00411761
TRINITY_DN48857_c0_g2	63.2	20	25.9443	10.1548	1.02435	0.758762	0.961507	0.596315	0.98492	0.644762
TRINITY_DN50572_c2_g1	22.13	45	249.707	6.66846	0.952625	0.00640479	1.9224	9.3041e-05	1.83133	0.000118438
TRINITY_DN53904_c0_g1	38.84	18	64.8302	8.25049	1.49386	0.000633157	0.846357	0.0151529	1.26434	0.00378186
TRINITY_DN51273_c1_g4	49.27	12	22.713	9.15869	1.11282	0.0123475	1.33052	0.000168609	1.48064	0.000122925
TRINITY_DN45841_c0_g1	47.8	12	36.5625	6.25244	1.06053	0.354081	0.842384	0.0884228	0.893377	0.105537
TRINITY_DN51594_c0_g1	65.13	17	30.1446	8.6167	1.39324	0.0358415	1.32559	0.0415986	1.84685	0.0027969
TRINITY_DN47918_c6_g1	58.25	8	22.0926	8.29443	0.771931	0.109936	1.08771	0.375616	0.839635	0.150392
TRINITY_DN52241_c0_g2	61.88	1	20.6807	6.94678	0.727486	0.0122619	0.91077	0.180232	0.662572	0.00287388
TRINITY_DN48603_c1_g2	40	2	23.9273	11.312	0.937111	0.274672	0.850511	0.0420935	0.797023	0.00802088
TRINITY_DN50894_c3_g4	31	28	129.124	6.01123	1.16779	0.00894684	1.10834	0.00996714	1.29432	0.000560972
TRINITY_DN49999_c0_g1	47.2	17	41.6457	6.16357	0.775126	0.00193535	1.0228	0.524402	0.792796	0.000663644
TRINITY_DN43522_c0_g1	48.47	21	39.4871	6.354	1.02205	0.638726	1.09066	0.0407009	1.1147	0.0497518
TRINITY_DN53658_c1_g1	25.02	23	118.232	5.36377	0.843788	0.0251049	0.883141	0.0214731	0.745184	0.00236311
TRINITY_DN43876_c0_g1	55.52	15	36.2455	7.43018	0.996073	0.936765	1.01446	0.771698	1.01048	0.628894
TRINITY_DN55558_c0_g1	43.83	14	43.297	7.66455	0.944567	0.241922	1.01113	0.800582	0.95508	0.436873
TRINITY_DN54451_c0_g1	47.63	16	46.731	8.71924	1.08329	0.416535	0.911852	0.232559	0.987802	0.877945
TRINITY_DN53784_c5_g1	33.1	16	62.837	7.7085	1.16713	0.0153033	0.98576	0.678679	1.15051	0.0262604
TRINITY_DN54545_c0_g3	57.18	26	47.5494	6.46826	1.1032	0.00277409	0.942427	0.0424405	1.03968	0.165033
TRINITY_DN51594_c0_g3	78.54	20	25.4742	8.49951	1.083	0.459741	1.71046	0.00829741	1.85243	0.00574438
TRINITY_DN50387_c2_g1	63.08	21	44.3955	8.89502	1.36253	0.0110063	0.906464	0.0353596	1.23508	0.0340171
TRINITY_DN44648_c0_g1	64.79	10	23.5061	6.80029	0.714286	0.00135925	0.853466	0.0413782	0.609618	0.00023496
TRINITY_DN45472_c0_g1	51.79	22	44.3089	7.03467	1.11181	0.0126898	1.00753	0.724225	1.12019	0.00743243
TRINITY_DN52730_c0_g2	60.87	16	30.642	9.12939	0.941298	0.22518	1.11124	0.0116104	1.04601	0.273548
TRINITY_DN55107_c0_g4	56.08	8	20.4276	8.03076	0.752989	0.00217301	0.995819	0.901081	0.749841	0.00324988
TRINITY_DN51937_c0_g2	51.82	18	42.0348	7.45947	0.935938	0.206959	1.64199	0.000135304	1.5368	0.000100282
TRINITY_DN48513_c0_g1	51.53	12	29.535	7.6499	1.15145	0.136146	1.17042	0.0524783	1.34767	0.00226351
TRINITY_DN50153_c5_g4	49.29	16	39.7483	6.06201	1.13461	0.00395167	1.00221	0.93737	1.13712	0.0126146
TRINITY_DN51262_c3_g1	28.37	27	116.579	5.89697	3.46284	0.00283434	1.61423	0.00590305	5.58981	4.0016e-06
TRINITY_DN52687_c0_g1	36.42	25	69.7709	6.27783	1.06383	0.222245	1.09598	0.0238623	1.16593	0.0113996
TRINITY_DN51432_c2_g7	32.79	32	95.8195	6.97607	0.958561	0.199182	0.908973	0.00536541	0.871307	0.0116475
TRINITY_DN52124_c0_g3	60	9	27.809	4.91943	0.92948	0.391989	1.75035	0.0556281	1.62691	0.0812724
TRINITY_DN52989_c1_g2	49.64	14	30.2396	8.39697	1.02314	0.239123	1.3211	1.41671e-05	1.35168	5.48555e-05
TRINITY_DN46666_c0_g1	42.42	18	46.6095	6.87354	1.09471	0.0865061	0.996417	0.931242	1.09079	0.0651324
TRINITY_DN50501_c3_g3	36.79	13	48.0053	8.60205	0.943756	0.0338522	1.09991	0.167047	1.03804	0.546903
TRINITY_DN54437_c0_g3	38.8	14	50.0795	4.79248	0.932663	0.00489342	0.929792	0.034657	0.867182	0.0038138
TRINITY_DN51616_c0_g2	45.77	26	70.2286	9.05615	1.11357	0.00794813	0.997731	0.921234	1.11105	0.00673192
TRINITY_DN51739_c3_g2	67.58	19	24.9502	9.94971	0.982312	0.762351	1.01793	0.728682	0.999926	0.99809
TRINITY_DN45162_c1_g1	28.37	32	120.784	6.13818	1.10549	0.141125	0.947348	0.322299	1.04728	0.143337
TRINITY_DN48981_c0_g2	57.04	5	16.5198	10.0962	1.14317	0.190466	1.03967	0.491982	1.18852	0.0643139
TRINITY_DN51713_c0_g2	47.24	7	17.5861	8.67529	0.989924	0.782495	0.978587	0.467911	0.968726	0.297301
TRINITY_DN47264_c0_g1	35.15	6	26.3852	5.2749	0.927746	0.108801	0.913206	0.0399932	0.847224	0.00417714
TRINITY_DN54732_c0_g4	35.21	18	62.1913	9.51025	1.43917	0.000900478	1.01513	0.683107	1.46095	6.25991e-05
TRINITY_DN49054_c0_g1	38.9	20	69.2493	6.49365	1.33984	0.0410516	1.14109	0.0867818	1.52889	0.00448184
TRINITY_DN55990_c1_g1	26.6	14	75.5603	4.64014	0.981953	0.654278	1.07832	0.0605767	1.05886	0.169299
TRINITY_DN41450_c0_g1	64.29	17	33.5525	5.65576	1.86792	9.73704e-05	1.70873	0.000153835	3.19176	1.75703e-05
TRINITY_DN46638_c0_g1	36.4	11	27.4078	5.51611	1.24035	0.000156401	1.06242	0.0574267	1.31778	0.000635822
TRINITY_DN52357_c1_g2	25.49	16	83.536	5.60498	1.02362	0.142291	0.884443	0.00593746	0.905336	0.0165637
TRINITY_DN53468_c1_g1	56.74	10	23.472	8.04541	1.01311	0.885328	1.68299	0.000371279	1.70505	0.00131457
TRINITY_DN44477_c0_g1	24.43	11	52.8618	5.23682	0.872088	0.076531	0.8688	0.102292	0.75767	3.42739e-06
TRINITY_DN47604_c0_g1	48.03	18	49.9303	5.61768	1.0365	0.338099	0.969597	0.388808	1.00499	0.849195
TRINITY_DN54948_c0_g2	45.79	20	46.9903	7.48877	1.13183	0.00581186	0.947005	0.0474339	1.07185	0.0101126
TRINITY_DN54612_c3_g1	33.87	17	46.237	5.70654	0.888414	0.00624832	0.729516	0.000323191	0.648111	2.71585e-05
TRINITY_DN49736_c0_g1	12.88	2	25.341	9.80322	0.802781	0.0338882	1.09525	0.137738	0.879246	0.0822436
TRINITY_DN55656_c3_g1	38.56	10	28.3377	9.61279	1.11574	0.32158	1.12757	0.174108	1.25808	0.0122121
TRINITY_DN43361_c0_g1	46.43	13	30.795	8.38232	0.926414	0.247643	1.35655	0.000545487	1.25673	0.0143797
TRINITY_DN52910_c1_g1	47.09	9	19.701	9.18799	1.0127	0.913295	1.05863	0.4135	1.07207	0.470572
TRINITY_DN53350_c0_g1	51.23	11	26.8948	5.75732	0.632358	5.67708e-06	1.1783	0.0025823	0.745108	9.72515e-05
TRINITY_DN46882_c0_g1	50.87	28	67.4758	8.88037	0.878625	0.00709853	0.807869	0.00123914	0.709814	5.89544e-05
TRINITY_DN54161_c0_g2	50.26	17	42.4218	7.81104	0.758691	3.4281e-05	1.13527	0.000742926	0.861323	0.000170064
TRINITY_DN48282_c0_g2	23.67	8	43.4114	4.79248	1.12925	0.00101473	1.11389	0.00239641	1.25786	0.000290015
TRINITY_DN54390_c2_g1	40.94	21	50.8418	9.21729	1.00072	0.955063	1.12202	0.000538635	1.12283	0.00138451
TRINITY_DN48170_c1_g1	20.15	37	217.771	6.15088	1.10202	0.00787036	0.859272	6.39159e-05	0.946934	0.071018
TRINITY_DN43383_c0_g1	49.9	21	54.8409	7.6792	0.910237	0.151805	1.19444	0.064267	1.08722	0.16835
TRINITY_DN54151_c0_g1	57	8	43.0977	5.59229	0.54256	0.000167089	0.720777	0.000491995	0.391065	5.8608e-05
TRINITY_DN53931_c0_g1	64.83	10	16.1298	10.4478	1.02939	0.257478	0.974547	0.0314624	1.00319	0.896431
TRINITY_DN52203_c0_g1	66.36	2	11.812	7.41553	1.04827	0.555803	0.929893	0.337462	0.974781	0.503279
TRINITY_DN45112_c0_g1	55.42	13	27.1777	6.31592	1.13566	0.00151895	1.03315	0.274805	1.1733	0.00277175
TRINITY_DN52689_c0_g1	60.64	9	38.3527	7.56201	0.845946	0.0191847	0.97813	0.609296	0.827445	0.0111437
TRINITY_DN48451_c0_g2	46.22	17	46.5742	5.80811	1.83045	0.000381395	2.52259	1.96927e-05	4.61748	7.67753e-06
TRINITY_DN55176_c1_g3	63.56	17	27.776	6.354	0.845948	0.0326119	0.967782	0.574992	0.818694	0.00552325
TRINITY_DN54459_c0_g3	39.41	17	60.9928	7.15186	1.12806	0.000185362	0.795325	0.000218371	0.897176	0.0028275
TRINITY_DN55510_c1_g3	37.21	18	56.124	8.07471	0.98961	0.762673	0.998837	0.955443	0.988458	0.688477
TRINITY_DN51440_c4_g3	49.66	6	32.4122	9.24658	0.892083	0.0249853	1.22284	0.0045325	1.09087	0.098476
TRINITY_DN47894_c0_g1	24.5	40	191.251	6.82959	0.898723	0.00552005	0.882784	0.00217201	0.793378	0.000828053
TRINITY_DN47095_c0_g1	29.42	23	90.0726	6.07471	1.31881	0.00318264	1.19697	0.00750011	1.57858	5.14406e-05
TRINITY_DN52710_c3_g2	34.29	15	53.0313	7.10791	1.15259	0.00551616	1.15167	0.00126431	1.3274	0.000205932
TRINITY_DN49614_c1_g2	53.53	21	47.2588	5.64307	1.00779	0.818398	0.919128	0.0653037	0.926287	0.13448
TRINITY_DN55160_c2_g2	40.77	1	14.7939	6.20166	0.987129	0.830725	0.837328	0.00398326	0.826551	0.0263731
TRINITY_DN54543_c0_g1	43.78	11	25.5142	7.72314	0.680123	9.06717e-05	0.910063	0.0174537	0.618955	8.71446e-05
TRINITY_DN50848_c2_g3	35.27	27	76.8929	6.41748	0.951389	0.0832653	1.09655	0.0121321	1.04325	0.20342
TRINITY_DN53514_c2_g2	35.19	16	66.771	6.32861	0.895629	0.0289239	1.16745	0.00170023	1.04561	0.149151
TRINITY_DN54090_c2_g1	40.37	18	54.2548	6.91748	1.2932	0.00737313	1.18209	0.0184989	1.52867	1.48461e-05
TRINITY_DN17359_c0_g1	27.03	32	129.446	5.8208	0.971868	0.216039	0.968636	0.445214	0.941386	0.193227
TRINITY_DN55979_c2_g2	22.12	37	195.917	5.47803	1.52852	0.000466639	0.85413	0.0128455	1.30556	0.00124973
TRINITY_DN53617_c4_g2	66.86	25	37.3917	6.81494	1.03996	0.0897252	1.01051	0.587565	1.05089	0.0248667
TRINITY_DN48603_c1_g1	32.85	1	24.3925	11.2241	0.944751	0.210649	0.941164	0.130469	0.889166	0.0292659
TRINITY_DN55063_c0_g2	43.2	12	37.2427	6.30322	1.65482	0.0384203	5.22005	3.15671e-05	8.63823	1.16794e-05
TRINITY_DN51677_c1_g2	46.93	15	38.8883	9.56885	0.869393	0.0183785	0.693536	0.000178081	0.602956	0.0003793
TRINITY_DN53565_c1_g2	27.49	32	148.999	9.36377	1.45486	0.0229504	1.27562	0.0534023	1.85585	0.00295429
TRINITY_DN53058_c2_g5	25.12	8	42.7103	7.00537	0.657651	0.00287409	1.31824	0.000770675	0.86694	0.0583839
TRINITY_DN52124_c0_g1	63.13	10	20.6736	6.3667	0.724716	0.0211701	1.17417	0.378078	0.850937	0.34998
TRINITY_DN47124_c0_g1	44.11	33	103.029	5.31299	1.16669	0.00201056	0.507333	6.33315e-06	0.591902	0.000141637
TRINITY_DN55558_c0_g2	29.32	21	113.651	6.53662	1.11615	0.00557657	1.10674	0.0130872	1.23529	0.000458335
TRINITY_DN53000_c0_g1	45.48	7	36.4558	8.33838	1.07394	0.00671948	1.34535	0.000156247	1.44482	0.000100365
TRINITY_DN54255_c1_g4	43.75	9	38.0084	8.48486	1.05986	0.0647721	0.925284	0.0142645	0.980673	0.421303
TRINITY_DN52381_c1_g4	57.72	4	13.6706	5.05908	0.610409	0.00141441	0.998058	0.981373	0.609224	8.62244e-05
TRINITY_DN54416_c0_g5	35.57	19	47.0508	7.78174	0.949605	0.0441705	0.969233	0.103139	0.920388	0.0131202
TRINITY_DN52275_c1_g3	45.64	10	39.0826	4.91943	1.02232	0.452235	0.852109	0.00249179	0.871128	0.00237928
TRINITY_DN53319_c4_g1	30.54	22	81.9401	6.02393	1.11943	0.052606	0.6528	0.000365878	0.730763	0.00378556
TRINITY_DN48660_c4_g3	78.91	9	15.8151	9.26123	1.05349	0.692553	1.39174	0.0196221	1.46618	0.0240689
TRINITY_DN49667_c2_g5	40.61	7	18.6852	10.2134	1.28603	0.0254465	0.934697	0.37398	1.20205	0.0161076
TRINITY_DN48212_c0_g1	42.18	16	50.8448	7.31299	0.977667	0.248285	1.19814	2.0946e-05	1.17139	0.000460126
TRINITY_DN53617_c4_g1	45.17	20	58.8544	6.354	1.28886	0.000709885	1.21337	0.000698955	1.56387	0.000177657
TRINITY_DN51238_c0_g1	24.62	26	129.99	6.63916	1.05618	0.237551	0.928891	0.0396308	0.981074	0.630463
TRINITY_DN51420_c2_g1	38.78	23	70.3309	7.10791	0.891308	0.00272094	0.941211	0.0860765	0.838909	0.00251199
TRINITY_DN52551_c2_g7	55.15	1	15.8295	8.47021	1.08128	0.798339	1.12244	0.637112	1.21367	0.369374
TRINITY_DN48788_c1_g1	62.41	3	14.3214	4.93213	1.12231	0.132021	0.897279	0.197641	1.00702	0.91834
TRINITY_DN50272_c0_g3	43.09	20	60.6116	6.03662	0.950077	0.117088	0.851409	0.00212681	0.808904	0.00229793
TRINITY_DN52745_c2_g1	77.38	15	17.8197	6.78564	2.45775	0.000106032	2.7883	6.02872e-05	6.85296	2.45189e-05
TRINITY_DN48191_c0_g1	49.54	7	24.4912	9.81787	1.15912	0.241041	1.00826	0.933097	1.1687	0.163952
TRINITY_DN54544_c2_g1	51.98	14	36.4152	5.22412	0.858918	0.00383271	0.862361	0.00195018	0.740697	0.00014401
TRINITY_DN52229_c0_g4	25.12	16	117.063	7.62061	1.31274	0.00182978	0.748263	0.00261155	0.982277	0.649153
TRINITY_DN51681_c1_g1	37.66	19	62.3976	8.01611	0.591277	0.00352454	0.678602	0.00136555	0.401242	0.000817774
TRINITY_DN55615_c0_g5	16.32	1	85.2743	6.27783	0.454327	0.01887	0.918537	0.505261	0.417316	0.0159392
TRINITY_DN49211_c0_g1	55.63	9	15.5397	4.93213	1.0165	0.643944	1.03345	0.37378	1.0505	0.257429
TRINITY_DN53908_c1_g2	33.57	1	15.0856	10.6382	1.52303	0.0103095	0.779199	0.0670598	1.18674	0.0623585
TRINITY_DN51494_c1_g1	40.25	25	64.3176	6.06201	0.920822	0.0389122	1.04043	0.0456223	0.958051	0.180893
TRINITY_DN53804_c0_g1	29.6	28	110.386	4.80518	0.926153	0.119877	0.981879	0.611085	0.90937	0.0355432
TRINITY_DN44501_c0_g1	41.07	13	36.9013	6.96143	0.810774	0.00738426	0.944105	0.17446	0.765456	0.000937476
TRINITY_DN42132_c0_g1	38.49	20	63.4414	6.43018	1.17018	0.0031192	0.978293	0.446224	1.14478	0.00452494
TRINITY_DN53739_c1_g1	32.76	19	72.4468	6.66846	0.950738	0.184783	1.1129	0.0514356	1.05808	0.0844001
TRINITY_DN55944_c1_g2	8.88	41	488.781	6.29053	1.10824	0.090298	0.970529	0.479537	1.07557	0.0451684
TRINITY_DN48477_c0_g1	34.36	15	42.8448	6.65381	1.1797	0.000756342	1.29695	0.000382589	1.53002	3.8419e-05
TRINITY_DN48578_c0_g1	39.22	13	41.7756	7.34229	0.890428	0.00804809	1.18696	0.000617171	1.05691	0.0872712
TRINITY_DN47695_c0_g1	42.79	4	24.5252	9.72998	1.06458	0.646768	1.31225	0.0589725	1.39699	0.0253682
TRINITY_DN50580_c1_g3	55.22	3	15.6747	10.4624	1.14428	0.0452311	1.09042	0.0906924	1.24774	0.00158299
TRINITY_DN56010_c3_g2	40.43	17	51.2769	8.00146	0.850861	0.000644511	0.762668	0.000157112	0.648925	8.18275e-06
TRINITY_DN55219_c1_g5	43.09	31	79.966	9.11475	0.895381	0.0205855	0.849287	0.00788663	0.760436	4.24648e-06
TRINITY_DN56038_c4_g3	56.45	10	13.8895	10.4771	1.86755	0.00183521	2.02329	1.32113e-05	3.77859	8.52697e-06
TRINITY_DN50810_c3_g2	36.08	11	65.4002	7.94287	0.755128	0.000612826	0.925104	0.0553247	0.698572	0.000429905
TRINITY_DN54960_c0_g5	39.89	24	61.7365	6.354	1.10878	0.0113916	1.29278	4.86187e-05	1.4334	0.000111185
TRINITY_DN50185_c1_g1	40.89	24	64.9699	5.5542	1.17259	0.0122997	0.989327	0.722668	1.16008	0.00628027
TRINITY_DN48394_c5_g2	35.65	16	60.7387	7.04932	0.875532	0.000687277	0.931004	0.0241061	0.815124	0.000989964
TRINITY_DN15085_c0_g1	29.66	9	42.3174	7.38623	2.35726	0.000295112	1.24605	0.00903198	2.93726	1.53647e-06
TRINITY_DN50580_c1_g4	68.97	4	13.5925	10.1987	0.884164	0.0292429	0.972306	0.554951	0.859678	0.00819554
TRINITY_DN51440_c4_g5	57.21	3	25.6026	8.90967	0.945016	0.41764	1.12224	0.173429	1.06054	0.343701
TRINITY_DN54214_c2_g2	15.26	18	143.543	5.31299	1.32243	0.000726643	1.01174	0.627916	1.33795	0.000239456
TRINITY_DN50637_c4_g1	18.56	43	275.072	8.646	1.11138	0.0097714	0.890865	0.0075313	0.990094	0.171682
TRINITY_DN52414_c0_g3	62.62	10	21.7486	7.41553	1.8012	5.27112e-05	2.39372	5.0205e-05	4.31157	1.93547e-05
TRINITY_DN53968_c0_g1	29.34	19	76.2561	8.54346	1.08324	0.0170785	1.05333	0.0786664	1.14102	0.00168013
TRINITY_DN50606_c0_g1	35.61	12	50.3693	9.0708	1.04431	0.317284	0.844503	0.00638485	0.881925	0.00914384
TRINITY_DN53746_c2_g1	38.41	15	51.2769	6.15088	0.694979	0.000105759	0.851751	0.00606713	0.591949	9.69495e-05
TRINITY_DN55745_c0_g1	30	3	14.4749	10.2427	2.34129	1.76188e-06	0.921006	0.0336736	2.15634	3.31705e-05
TRINITY_DN51519_c3_g2	38.7	14	58.027	5.16064	1.31223	1.89704e-06	1.96421	0.000206501	2.5775	8.70104e-05
TRINITY_DN50762_c1_g1	39.34	5	30.9587	10.9312	1.08951	0.213325	0.907976	0.173496	0.989253	0.39345
TRINITY_DN53574_c1_g1	51.28	20	39.7161	7.6499	0.505497	0.00258177	1.10142	0.0310515	0.556765	0.00416666
TRINITY_DN49977_c2_g1	36.18	20	69.8424	7.04932	0.418839	0.000384688	0.938301	0.319923	0.392997	0.000409361
TRINITY_DN53119_c0_g1	17.58	9	79.8255	5.16064	1.09092	0.302123	0.844009	0.0839818	0.920745	0.165728
TRINITY_DN48416_c1_g3	31.39	12	47.5566	6.63916	1.06173	0.322874	0.827611	0.00603927	0.878703	0.0534609
TRINITY_DN54916_c1_g3	60.85	11	24.9736	4.83057	1.00212	0.948829	1.11619	0.0068154	1.11856	0.00617918
TRINITY_DN50604_c1_g2	53.27	18	48.1753	6.85889	1.34934	0.0115979	5.66062	5.24692e-05	7.63808	4.06935e-05
TRINITY_DN53354_c0_g1	27.38	24	76.0735	5.56689	0.973016	0.486512	0.984183	0.569723	0.957625	0.189929
TRINITY_DN47040_c0_g1	40	7	15.5833	9.5835	2.85015	0.000363632	2.12136	2.53716e-05	6.04617	2.19595e-06
TRINITY_DN55745_c0_g3	30	3	14.3808	10.2427	2.8359	0.000172796	0.698227	0.00336455	1.9801	5.72171e-05
TRINITY_DN51884_c2_g1	44.49	5	31.4007	4.99561	0.854704	0.0237109	1.37279	0.031478	1.17333	0.177541
TRINITY_DN52903_c0_g1	40.53	27	75.8794	6.68311	2.14287	0.000184664	0.841441	0.0201472	1.8031	0.000883363
TRINITY_DN55654_c1_g1	25.6	9	60.0773	9.18799	0.305455	0.000997019	1.06268	0.507028	0.324601	0.00101876
TRINITY_DN48822_c2_g1	25.23	22	110.884	6.25244	1.82188	0.000950031	1.21192	0.017453	2.20796	6.96408e-06
TRINITY_DN47030_c0_g1	35.45	16	59.452	5.51611	0.860109	0.00349811	0.656212	1.36372e-05	0.564414	4.12469e-05
TRINITY_DN53603_c0_g1	37.65	13	50.9457	8.92432	0.903758	0.253709	0.910369	0.0176066	0.822753	0.0636146
TRINITY_DN52907_c1_g7	46.79	6	16.8425	5.05908	1.02923	0.296197	1.40144	0.000461368	1.4424	0.000253288
TRINITY_DN43003_c0_g1	38.3	16	42.6706	5.80811	1.46844	0.00109555	1.11729	0.0189092	1.64068	8.98771e-05
TRINITY_DN55652_c1_g1	49.06	12	28.671	9.94971	0.957795	0.0984885	1.03636	0.262258	0.992621	0.775916
TRINITY_DN54808_c0_g5	32.88	1	15.3807	10.5649	1.33758	0.0292739	0.639211	0.0146415	0.854993	0.0735956
TRINITY_DN51440_c0_g1	41.58	18	44.8033	6.58057	0.976402	0.428844	1.10002	0.0285174	1.07406	0.00448904
TRINITY_DN48788_c1_g2	65.41	2	14.2964	5.0083	1.15997	0.0760027	0.857137	0.095982	0.99425	0.929325
TRINITY_DN52241_c0_g1	61.88	1	20.7127	6.94678	1.14027	0.0394288	1.1708	0.0219363	1.33502	0.00118082
TRINITY_DN55229_c0_g3	49.09	14	43.6669	4.4624	0.987166	0.797807	1.03402	0.617568	1.02075	0.658477
TRINITY_DN54773_c0_g1	21.87	1	41.7658	5.47803	1.91472	0.471412	0.342443	0.32108	0.655682	0.354632
TRINITY_DN49588_c1_g4	8.05	2	84.7077	5.0083	0.906843	0.00539978	0.89758	0.00722622	0.813964	0.000955547
TRINITY_DN53746_c2_g3	64.66	5	13.5205	10.1108	1.06686	0.522538	1.02373	0.802355	1.09218	0.0183758
TRINITY_DN49107_c0_g11	28.38	35	139.377	7.72314	1.02164	0.166573	0.800662	0.000294888	0.817988	0.000596575
TRINITY_DN50239_c1_g3	34.42	10	33.3382	7.73779	1.04029	0.396172	0.875793	0.0434899	0.911079	0.00357247
TRINITY_DN56055_c2_g1	45.66	9	30.2423	6.12549	0.828582	0.233784	1.55932	0.0038363	1.29203	0.0528036
TRINITY_DN55331_c1_g1	31.09	26	97.1367	5.50342	1.10884	0.108513	0.664105	0.00160403	0.736388	0.000240352
TRINITY_DN53275_c3_g1	53.74	22	51.7374	6.02393	0.946102	0.0813821	1.04142	0.311226	0.985295	0.700521
TRINITY_DN47962_c0_g1	42.34	16	54.8054	5.94775	1.01596	0.711274	0.890108	0.0047956	0.904317	0.0615444
TRINITY_DN44277_c0_g1	31.83	11	31.6379	9.31982	1.31647	0.00195421	1.39961	8.56615e-05	1.84255	5.68072e-05
TRINITY_DN44446_c0_g3	24.29	1	14.4379	10.3159	1.587	0.0112196	0.854928	0.153206	1.35677	0.0136219
TRINITY_DN51368_c0_g1	34.54	18	61.9821	5.50342	1.30517	0.000671775	0.978493	0.49015	1.2771	0.000139934
TRINITY_DN51717_c0_g1	23.36	15	58.3059	8.67529	0.674467	0.0146985	0.793311	0.0430247	0.535062	0.00240248
TRINITY_DN45402_c0_g1	41.5	14	48.3733	6.56592	1.09713	0.00898307	1.00051	0.984277	1.09768	0.0164331
TRINITY_DN50191_c0_g1	22.13	2	12.0037	4.2085	1.09297	0.12595	1.03655	0.527362	1.13291	0.0675287
TRINITY_DN48342_c0_g1	41.18	14	36.3939	6.45557	1.15712	0.103519	1.00329	0.87948	1.16094	0.0913312
TRINITY_DN52734_c0_g1	55.22	13	29.759	7.00537	1.04853	0.186195	1.03697	0.315973	1.08729	0.00617018
TRINITY_DN47991_c1_g1	40.99	13	35.4739	6.1001	1.03662	0.631661	1.13397	0.0608507	1.1755	0.0196659
TRINITY_DN55937_c2_g1	47.08	7	28.4103	5.18604	0.866526	0.0431382	1.04082	0.417322	0.901896	0.0642911
TRINITY_DN54936_c1_g2	17.21	4	51.0626	6.16357	0.875581	0.0244687	1.12873	0.034877	0.988295	0.820619
TRINITY_DN54407_c0_g1	47.73	9	25.0071	9.36377	0.95525	0.311782	1.10432	0.101675	1.0549	0.329275
TRINITY_DN53352_c1_g2	43.54	12	34.6133	9.27588	0.98713	0.825807	1.40242	0.000696994	1.38437	0.00195579
TRINITY_DN54622_c0_g1	20.25	19	109.618	5.69385	0.909469	0.00916253	1.07184	0.0255455	0.974804	0.228405
TRINITY_DN43315_c0_g1	45.13	13	34.1023	5.22412	1.1369	0.187045	1.18514	0.0299172	1.34739	0.00599946
TRINITY_DN56055_c2_g2	34.77	3	40.1202	6.62451	0.261084	0.00192402	0.982478	0.927642	0.25651	0.001775
TRINITY_DN46838_c0_g1	58.78	10	14.7919	9.65674	1.40272	0.0381092	0.981612	0.769367	1.37693	0.0290211
TRINITY_DN51602_c0_g1	27.74	11	47.2266	5.17334	0.87821	0.0393674	0.886348	0.00180073	0.778399	0.00625327
TRINITY_DN51521_c1_g6	38.85	15	47.6427	6.53662	1.65983	0.00120984	0.94031	0.290335	1.56075	3.1403e-05
TRINITY_DN55258_c0_g2	16.04	23	163.547	6.25244	0.970173	0.0600022	0.893865	0.00126916	0.867203	0.000585431
TRINITY_DN55096_c1_g6	36.68	23	69.0066	9.29053	0.946515	0.283324	0.986203	0.670075	0.933456	0.225166
TRINITY_DN53951_c0_g1	73.08	8	11.1574	7.43018	1.89859	3.80811e-06	5.66355	0.00951548	10.7528	0.00676877
TRINITY_DN53802_c2_g2	40.25	10	34.3982	5.30029	1.38646	0.000371724	1.16961	0.0104335	1.62163	0.0005412
TRINITY_DN50649_c1_g4	41.5	8	32.9491	7.02002	1.02998	0.329129	0.922766	0.0334366	0.95043	0.205107
TRINITY_DN45397_c0_g1	59.44	10	20.6527	8.73389	1.07622	0.419673	0.855846	0.0989673	0.921078	0.21455
TRINITY_DN51720_c1_g4	63.79	13	27.8258	6.85889	1.8548	9.34645e-05	1.12681	0.684749	2.09	0.113123
TRINITY_DN49244_c1_g2	21.91	6	48.7135	9.23193	0.928363	0.261665	1.15307	0.0345296	1.07046	0.194963
TRINITY_DN51093_c0_g2	34.39	2	29.198	9.90576	1.29657	0.00804623	0.799539	0.0054254	1.03666	0.532856
TRINITY_DN52210_c1_g1	48.72	30	65.8958	9.0415	0.832536	0.00187491	0.923802	0.0310012	0.769099	0.00105608
TRINITY_DN44742_c0_g1	18.34	21	140.484	6.20166	1.28135	0.00907561	0.957029	0.214429	1.22629	0.0129413
TRINITY_DN50562_c0_g1	40.23	25	68.3746	5.90967	1.06027	0.0983767	1.00229	0.950878	1.0627	0.090942
TRINITY_DN44291_c0_g1	33.11	19	81.1035	5.63037	0.854326	0.00199285	1.18337	0.00267676	1.01099	0.73398
TRINITY_DN55765_c0_g1	27.4	4	15.4912	7.63525	2.80979	5.74175e-06	1.71476	1.29161e-05	4.81812	1.07764e-06
TRINITY_DN52679_c0_g1	31.63	15	60.2956	7.15186	1.06311	0.226366	1.16067	0.0179341	1.23393	0.00674892
TRINITY_DN52806_c1_g1	28.6	24	96.3342	4.53857	1.14272	0.00216763	0.946547	0.0296952	1.08164	0.0194848
TRINITY_DN52113_c0_g1	29.44	19	89.4812	6.22705	1.13334	0.00214939	0.503144	3.37054e-06	0.570235	6.66696e-06
TRINITY_DN54639_c0_g1	63.3	10	12.6044	5.88428	1.15018	0.0440131	1.16263	0.0151016	1.33723	0.00315262
TRINITY_DN48601_c0_g4	36.56	11	57.012	7.88428	0.643249	0.000577799	1.25332	0.00443138	0.806193	0.00255798
TRINITY_DN51695_c0_g1	50.21	25	53.2391	6.12549	1.06335	0.148237	1.0687	0.0630103	1.13641	0.00537373
TRINITY_DN55373_c2_g3	34.97	13	44.2192	5.41455	0.89829	0.0229453	1.14154	0.349954	1.02543	0.844416
TRINITY_DN54564_c2_g1	36.84	20	39.6054	5.05908	1.11328	0.229188	0.870655	0.0533747	0.969286	0.663934
TRINITY_DN42344_c0_g1	42.66	3	15.0664	10.3892	1.43961	0.0245868	0.850347	0.188683	1.22417	0.0194502
TRINITY_DN53201_c2_g1	24.01	30	120.564	5.36377	0.854492	0.000553809	0.850986	0.000139652	0.72716	2.59876e-05
TRINITY_DN55080_c0_g1	25.3	19	90.0687	5.63037	1.26818	0.0111151	1.20857	0.0109815	1.53269	0.00313634
TRINITY_DN53271_c1_g2	31.87	4	26.1992	8.646	0.651966	0.00352069	1.26055	0.0299582	0.821832	0.0691651
TRINITY_DN55364_c2_g3	45.14	11	42.6515	8.5874	0.859941	0.0637301	1.39005	0.000844695	1.19536	0.0180279
TRINITY_DN49786_c8_g1	32.81	6	34.0657	5.8208	1.61908	0.0125925	1.10298	0.299696	1.78581	3.40418e-05
TRINITY_DN50539_c0_g1	34.85	8	33.1792	5.61768	0.967198	0.707693	1.16822	0.0305698	1.1299	0.117756
TRINITY_DN54380_c1_g1	57.59	11	17.0953	6.22705	0.849983	0.0892042	0.762331	0.0209672	0.647968	0.00127902
TRINITY_DN51347_c2_g9	26.41	11	65.6001	5.05908	0.891742	0.0105838	1.0878	0.203065	0.970039	0.590127
TRINITY_DN53805_c1_g2	30.89	7	48.8899	5.61768	1.27734	0.00369863	0.864154	0.0113263	1.10381	0.0120933
TRINITY_DN36730_c0_g1	30.36	15	69.777	7.51807	0.810062	0.00107335	0.721431	0.000647526	0.584404	8.71118e-05
TRINITY_DN55999_c1_g2	79.17	5	24.2063	6.23975	0.567772	8.79324e-05	1.07419	0.109747	0.609894	7.64422e-05
TRINITY_DN49300_c0_g2	48.41	17	32.3106	5.40186	0.903393	0.0171122	0.853282	0.000651936	0.770849	0.000960703
TRINITY_DN48124_c0_g1	57.98	8	13.2737	5.22412	0.761694	0.00137179	1.25799	0.0731569	0.958203	0.653894
TRINITY_DN44930_c0_g1	36.95	14	47.4657	8.79248	1.12698	0.251085	1.06388	0.0332314	1.19897	0.098948
TRINITY_DN51453_c0_g1	26.8	23	100.283	5.12256	0.90385	0.00230564	1.03124	0.0511497	0.932086	0.00278624
TRINITY_DN43070_c0_g1	34.21	15	58.0495	6.88818	1.02361	0.504624	1.2025	0.0010691	1.23089	0.00283829
TRINITY_DN53861_c0_g4	25.08	25	132.238	5.36377	0.982134	0.668663	0.884088	0.0160573	0.868293	0.0151655
TRINITY_DN52518_c2_g3	31.58	25	65.4938	9.65674	1.14787	0.0386888	0.760077	0.00275922	0.872471	0.0121849
TRINITY_DN41772_c0_g1	29.61	19	79.7185	6.53662	0.977192	0.33904	0.960964	0.16702	0.939047	0.0189333
TRINITY_DN54459_c1_g1	45.81	10	23.0338	7.63525	1.00781	0.777095	1.03688	0.0324056	1.04498	0.182292
TRINITY_DN51721_c0_g1	23.53	31	144.499	5.26221	1.0368	0.445046	0.787423	0.00444312	0.816402	0.0189777
TRINITY_DN54456_c2_g4	50.51	10	21.7473	7.03467	0.957742	0.0033011	0.94086	0.0102162	0.901101	0.00085339
TRINITY_DN54868_c0_g3	46.03	6	28.245	5.12256	1.14006	0.0705929	0.756636	0.00469907	0.862607	0.0116465
TRINITY_DN53066_c0_g2	36.66	10	33.9778	5.57959	2.82587	0.000164019	1.29491	0.00619212	3.65926	8.27271e-06
TRINITY_DN54684_c1_g3	62.79	12	24.3904	5.22412	0.701767	0.00383511	1.11207	0.0181558	0.780412	0.0118583
TRINITY_DN43590_c0_g1	40.86	12	39.9283	6.32861	1.01545	0.185776	1.2715	0.00581516	1.29114	0.00499336
TRINITY_DN54580_c0_g2	46.77	16	48.7089	6.45557	1.16244	0.0467313	0.514999	0.000591335	0.598652	4.32324e-06
TRINITY_DN51818_c1_g4	26.94	10	49.8409	8.27979	0.731834	0.00354334	1.12584	0.028582	0.823925	0.0143286
TRINITY_DN51293_c0_g1	32.85	16	54.8505	6.13818	1.23373	0.00497905	0.836295	0.000859284	1.03176	0.495705
TRINITY_DN50649_c1_g1	55.6	9	26.9931	9.05615	1.29818	0.00101112	0.923392	0.0358781	1.19873	0.00171209
TRINITY_DN51931_c0_g1	30.17	11	71.4724	5.18604	1.12807	0.079538	0.76755	0.007084	0.865853	0.0226062
TRINITY_DN53746_c1_g1	43.85	2	14.8644	10.7114	0.951767	0.315234	0.870516	0.0230151	0.828528	0.00852625
TRINITY_DN55289_c2_g2	23.79	4	27.4248	9.81787	0.845484	0.00794201	1.03833	0.273843	0.877893	0.0148586
TRINITY_DN53468_c1_g2	68.94	5	14.6437	8.32373	0.622665	0.0109231	1.77749	0.00115271	1.10678	0.285389
TRINITY_DN54094_c0_g2	15.37	11	121.866	9.26123	1.2671	0.0220864	1.27739	0.0115964	1.61857	0.000512217
TRINITY_DN56020_c0_g2	37.19	17	47.7388	7.97217	0.974888	0.648654	1.36895	0.00224912	1.33457	0.000133951
TRINITY_DN49014_c0_g1	27.13	9	34.3441	8.90967	0.862061	0.0167067	1.08142	0.167723	0.932249	0.18524
TRINITY_DN48972_c1_g7	40.66	11	52.885	6.17627	0.584106	0.000872022	0.927359	0.202702	0.541676	0.000318903
TRINITY_DN41483_c0_g1	25.91	13	55.7226	6.65381	1.20227	0.00339017	1.26747	0.000332346	1.52384	9.4272e-05
TRINITY_DN51582_c2_g1	44.75	12	24.669	5.23682	1.39675	0.000956932	1.09307	0.0145865	1.52675	9.66543e-05
TRINITY_DN44367_c0_g1	35	1	14.9063	10.3892	1.49935	0.00180162	1.43773	0.00407371	2.15567	0.000294836
TRINITY_DN54180_c2_g2	24.97	21	91.1218	5.40186	0.942935	0.00425886	0.973294	0.00243933	0.917753	0.000948146
TRINITY_DN48390_c1_g2	27.54	25	117.963	5.2876	1.09209	0.184429	0.763515	0.00984982	0.833826	0.00035316
TRINITY_DN55536_c0_g1	36.32	33	74.9875	6.7124	1.16313	0.00219631	0.875599	0.00581853	1.01844	0.472947
TRINITY_DN44658_c0_g1	34.33	14	51.8773	8.27979	1.64996	0.000714495	0.851452	0.0288877	1.40486	0.000968355
TRINITY_DN43780_c0_g1	53.78	18	38.1357	4.83057	1.71191	0.00596054	1.16914	0.0589789	2.00146	0.000323702
TRINITY_DN49942_c2_g1	57.61	14	33.7218	8.35303	0.843634	0.0777141	1.3468	0.358671	1.13621	0.650628
TRINITY_DN48687_c0_g2	32.42	5	19.6963	11.5757	1.2483	0.322595	0.637471	0.0706963	0.795754	0.174908
TRINITY_DN49695_c1_g1	42.93	14	43.4989	6.39209	1.06111	0.191371	1.16686	0.00174464	1.23817	0.0048498
TRINITY_DN44566_c1_g1	24.23	34	150.951	6.31592	1.02931	0.551171	0.979375	0.667205	1.00808	0.721917
TRINITY_DN52736_c0_g1	27.15	16	73.9787	6.88818	0.950652	0.310529	1.0019	0.952503	0.952453	0.300377
TRINITY_DN53516_c0_g1	24.48	9	44.0752	8.08936	1.35268	0.0106516	1.12465	0.0553428	1.5213	0.00101031
TRINITY_DN55314_c0_g1	29.48	14	63.594	5.2876	1.03336	0.598661	0.968644	0.625135	1.00095	0.963191
TRINITY_DN53190_c1_g1	36.61	17	77.6343	6.771	0.681425	0.000559945	0.966936	0.314658	0.658895	0.000666167
TRINITY_DN54921_c1_g2	67.65	9	14.287	8.49951	2.09275	0.00217807	1.80757	0.00046181	3.7828	3.06928e-06
TRINITY_DN47704_c0_g1	39.52	10	24.4635	6.87354	0.85752	0.00209022	0.924213	0.0143453	0.79253	0.000917475
TRINITY_DN49932_c1_g3	32.2	1	13.3103	7.25439	1.52525	0.15645	1.05624	0.636743	1.61103	0.139468
TRINITY_DN52306_c0_g5	40.26	19	70.7408	8.33838	0.546309	0.00218002	0.841567	0.00986079	0.459756	0.00117652
TRINITY_DN50738_c0_g1	29.79	9	40.395	8.36768	1.25925	0.000906055	1.25066	0.00289435	1.57489	0.000248887
TRINITY_DN51442_c1_g2	53.39	17	39.5881	4.99561	0.617244	0.0073463	0.919659	0.0441559	0.567654	0.00484803
TRINITY_DN54591_c1_g1	51.94	14	37.1283	6.27783	1.18038	0.0156743	1.33848	9.81033e-05	1.57992	0.000269492
TRINITY_DN46708_c0_g1	35.41	13	38.747	8.74854	1.40937	0.0130552	1.88464	7.71664e-06	2.65615	4.91468e-05
TRINITY_DN53493_c0_g1	80.45	8	14.3374	9.0708	2.87724	0.000143668	3.76574	0.000408242	10.835	0.000170213
TRINITY_DN47677_c0_g1	36.66	13	38.332	8.646	1.12112	0.0128002	1.69143	6.2726e-05	1.8963	1.3177e-05
TRINITY_DN52554_c1_g1	54.14	9	19.0383	10.4185	1.19724	0.10342	1.026	0.715546	1.22837	0.0190827
TRINITY_DN56003_c1_g1	35.7	20	55.8759	7.10791	0.854576	0.0155808	0.933892	0.0604939	0.798082	0.00460491
TRINITY_DN50684_c1_g1	37.37	14	41.8446	7.95752	0.79385	1.27283e-05	1.01174	0.486344	0.803173	0.00015327
TRINITY_DN55989_c2_g2	44.91	9	29.5892	5.31299	1.17246	0.02462	1.52917	0.00037106	1.7929	6.21404e-05
TRINITY_DN55239_c1_g2	58.4	22	42.1736	7.02002	1.03747	0.0379309	0.834053	0.000124092	0.865302	9.9912e-05
TRINITY_DN51153_c3_g2	41.48	3	19.3006	5.50342	0.908356	0.223013	0.885757	0.19453	0.804583	0.0325697
TRINITY_DN44772_c0_g1	34.07	16	50.1807	7.1665	1.22536	0.00272733	1.28034	0.00192147	1.56888	0.000213992
TRINITY_DN54095_c6_g1	46.68	25	63.5309	8.63135	0.971673	0.351341	0.904131	0.00214206	0.878519	0.0120707
TRINITY_DN55671_c1_g2	64.93	5	23.7291	5.17334	1.04865	0.747304	3.11079	4.50564e-05	3.26214	2.80308e-05
TRINITY_DN51392_c0_g1	34.55	6	29.8639	8.57275	1.08387	0.283908	0.88966	0.118998	0.964273	0.344072
TRINITY_DN51003_c0_g1	41.45	4	30.4566	7.92822	0.681933	0.00298096	0.960026	0.622355	0.654673	0.000371071
TRINITY_DN52518_c2_g1	28.35	12	42.2492	5.14795	1.20684	0.0182464	0.942857	0.251379	1.13788	0.00833511
TRINITY_DN51926_c2_g2	58.94	10	23.0859	7.91357	0.801395	0.00480673	0.921526	0.0744459	0.738506	0.00122343
TRINITY_DN53215_c0_g1	19.33	26	134.893	6.46826	1.14963	0.00311829	0.977682	0.39637	1.12397	0.00238273
TRINITY_DN55663_c4_g3	17.6	4	73.5132	4.61475	0.622706	0.000338865	1.51647	0.000218422	0.944316	0.0832918
TRINITY_DN55774_c1_g1	23.05	11	57.9587	8.38232	1.07173	0.147404	0.70539	0.000786294	0.755989	0.00033378
TRINITY_DN54216_c0_g3	44.58	11	27.1991	7.03467	1.19916	0.054648	1.06609	0.397898	1.27842	0.0111324
TRINITY_DN54090_c1_g1	82.24	1	11.5752	5.07178	0.969004	0.757994	1.05204	0.550147	1.01943	0.839244
TRINITY_DN53000_c0_g4	30.19	2	17.0486	5.14795	1.06282	0.524993	0.977647	0.771068	1.03907	0.644888
TRINITY_DN55500_c1_g2	41.57	20	63.7954	6.84424	1.24797	0.00284138	0.945006	0.200385	1.17934	0.00853806
TRINITY_DN55349_c0_g1	17.29	30	202.21	5.89697	1.021	0.522731	0.908501	0.00509223	0.927575	0.0632739
TRINITY_DN46190_c0_g1	21.57	10	56.5735	8.48486	1.06833	0.0260539	1.16162	0.0194951	1.241	0.00666487
TRINITY_DN50813_c0_g1	26.5	22	95.369	7.04932	1.15121	1.96511e-05	0.930437	0.00441918	1.07113	0.00770732
TRINITY_DN51160_c0_g1	29.11	11	60.4059	5.43994	0.753374	0.00022936	0.929126	0.0448736	0.699979	0.000134005
TRINITY_DN52182_c0_g1	41.51	8	34.7062	4.88135	1.29446	0.0035005	1.11568	0.00396153	1.44421	0.000845108
TRINITY_DN55100_c0_g1	26.73	6	33.0987	5.45264	1.04918	0.805478	1.19765	0.230661	1.25655	0.115086
TRINITY_DN55995_c3_g1	30.85	9	41.5561	5.52881	2.48952	4.37606e-05	1.35644	0.0059475	3.37689	8.93489e-05
TRINITY_DN44484_c0_g1	67.69	6	13.9542	9.62744	1.18209	0.000208693	1.14894	0.00494539	1.35815	0.000307482
TRINITY_DN51664_c0_g1	21.13	21	132.273	5.74463	0.847733	0.0045223	0.918987	0.0390454	0.779056	8.32534e-05
TRINITY_DN48318_c0_g1	27.06	19	78.4261	5.19873	0.831218	0.0253904	0.791271	0.00112339	0.657719	0.00147364
TRINITY_DN55152_c2_g1	30.8	21	83.1627	6.81494	0.883743	0.0240735	0.819958	7.28182e-05	0.724632	0.00123108
TRINITY_DN46810_c0_g1	63.21	5	10.4623	11.6489	1.15076	0.00188946	1.23244	0.00046177	1.41824	4.47707e-05
TRINITY_DN54966_c1_g2	41.2	22	52.2471	9.46631	1.10151	0.0178939	1.2621	0.000928105	1.39021	0.000141456
TRINITY_DN51495_c2_g1	36.27	15	46.0908	6.16357	0.95094	0.0450625	0.817243	0.00232342	0.777149	0.000285631
TRINITY_DN50482_c0_g1	42.77	12	34.455	5.87158	0.954856	0.394241	1.27064	4.73575e-05	1.21327	0.00977153
TRINITY_DN52475_c1_g5	41.44	16	48.9588	5.66846	1.10831	0.147238	0.72414	0.00750517	0.802573	0.0128765
TRINITY_DN47023_c0_g1	11.08	4	46.374	10.1987	0.993352	0.876472	0.960274	0.394879	0.953891	0.0274698
TRINITY_DN46579_c0_g2	67.23	5	12.5387	9.14404	1.17666	0.0790433	0.873158	0.0197774	1.02741	0.702303
TRINITY_DN51093_c0_g1	48.68	3	25.7007	10.4478	0.918663	0.30894	0.850997	0.115873	0.781779	0.000649872
TRINITY_DN41270_c0_g1	24.61	19	99.4985	4.90674	1.09145	0.434632	0.892843	0.135808	0.974494	0.800142
TRINITY_DN51109_c1_g3	13.28	17	150.798	9.02686	1.22278	0.0106778	0.930746	0.167164	1.1381	0.0343863
TRINITY_DN54960_c0_g3	20.37	16	125.151	7.38623	0.966331	0.103035	0.764913	0.000110899	0.739159	0.000274161
TRINITY_DN55569_c0_g1	22.27	14	68.9744	7.02002	0.878211	0.17076	1.78819	0.000738188	1.57041	0.000712552
TRINITY_DN55310_c2_g1	40.63	21	67.9237	8.104	0.901315	0.0562096	0.796777	0.0117299	0.718147	0.000165942
TRINITY_DN51140_c3_g1	25.9	23	111.496	5.10986	1.08291	0.00766276	0.845109	0.000386812	0.915182	0.0111589
TRINITY_DN49044_c0_g1	43.07	11	38.6112	6.82959	1.09227	0.372828	1.20625	0.0392061	1.31755	0.00527241
TRINITY_DN54926_c1_g1	31.66	18	64.8313	9.26123	0.937871	0.154428	0.771614	0.00165134	0.723674	0.00088513
TRINITY_DN49824_c0_g1	29.47	12	47.4961	5.2749	0.757078	0.005647	0.969746	0.570923	0.734173	0.000829082
TRINITY_DN47786_c0_g1	28.66	21	92.3304	6.7417	0.922032	0.0123348	1.01017	0.726496	0.931412	0.0237808
TRINITY_DN51676_c0_g3	25.38	15	66.9304	6.7124	1.13655	0.0433848	0.863582	0.0288724	0.981504	0.541536
TRINITY_DN50958_c0_g3	44.19	18	48.3514	10.1108	1.09734	0.0262498	0.90526	0.0165889	0.993378	0.792215
TRINITY_DN43001_c0_g1	26.08	22	108.599	6.44287	0.949983	0.186108	0.971972	0.340924	0.923357	0.020184
TRINITY_DN52480_c0_g1	43.06	10	32.0849	7.12256	0.972218	0.457683	1.13444	0.123176	1.10292	0.206759
TRINITY_DN46038_c0_g1	39.02	10	38.6144	5.93506	1.2635	0.00517182	1.2052	0.000910181	1.52277	0.000169619
TRINITY_DN44400_c0_g1	53.94	23	46.9218	4.70361	0.851334	0.000676531	0.963388	0.00468736	0.820165	0.000252097
TRINITY_DN54868_c0_g4	40.66	7	37.2754	6.23975	1.30851	0.00660626	0.709389	0.00518618	0.928245	0.20664
TRINITY_DN52229_c0_g2	16.65	7	117.791	7.79639	1.05482	0.297702	0.850599	0.00869947	0.897227	0.0345066
TRINITY_DN54969_c0_g1	48.27	24	52.0472	6.29053	3.33246	1.67647e-05	1.58923	5.18233e-05	5.29604	9.46219e-08
TRINITY_DN69684_c0_g1	51.63	10	23.7161	5.84619	1.02894	0.0641446	1.06848	0.0241049	1.0994	0.00434978
TRINITY_DN50142_c0_g1	34.83	14	52.678	7.78174	0.83947	0.0118972	1.43162	0.0009393	1.2018	0.000917093
TRINITY_DN55403_c0_g2	38.33	5	13.8498	11.7954	1.08662	0.0528735	0.955331	0.0643754	1.03808	0.227106
TRINITY_DN53439_c0_g5	20.39	18	102.895	5.13525	1.29744	0.00354345	0.936635	0.133991	1.21522	0.0238104
TRINITY_DN4650_c0_g1	40	1	11.567	9.15869	1.03659	0.659993	0.901588	0.264175	0.934581	0.20196
TRINITY_DN10520_c0_g1	35.93	14	37.3329	7.32764	1.98997	0.00162568	0.915452	0.242762	1.82173	0.000174356
TRINITY_DN54620_c0_g1	34.86	22	65.5979	5.13525	0.58846	3.13763e-05	0.835821	0.0119779	0.491847	3.43146e-05
TRINITY_DN50643_c1_g4	42.23	11	39.4661	8.29443	0.961855	0.424334	1.16746	0.0169025	1.12293	0.0196196
TRINITY_DN53932_c2_g2	22.85	15	72.7467	5.10986	0.933728	0.204315	0.780597	0.00149456	0.728865	0.00180363
TRINITY_DN53098_c0_g1	43.66	5	15.3009	7.98682	0.931092	0.387878	1.63861	0.000671872	1.52569	0.000589429
TRINITY_DN47637_c0_g1	35.7	14	43.3382	7.62061	0.989389	0.489779	0.786334	3.83404e-05	0.77799	5.63137e-05
TRINITY_DN48984_c1_g5	31.85	14	61.0675	5.50342	0.877769	0.244228	1.1652	0.175784	1.02278	0.81719
TRINITY_DN50587_c0_g1	43.79	17	30.6545	10.8433	0.86198	0.0508761	0.788592	0.0191758	0.679751	0.000587226
TRINITY_DN47242_c0_g1	39.78	13	30.1116	8.45557	3.39931	6.56936e-06	2.8171	2.43668e-05	9.57619	6.16078e-06
TRINITY_DN51224_c0_g1	56.55	14	18.8924	9.74463	1.1207	0.23692	1.00193	0.979107	1.12286	0.0869819
TRINITY_DN51418_c0_g2	28.37	5	23.8322	6.90283	0.763865	0.00465455	0.879952	0.0646375	0.672165	0.000164838
TRINITY_DN53723_c1_g5	45.45	8	23.1708	6.78564	1.10614	0.0243402	1.21723	0.00148153	1.34643	1.44528e-05
TRINITY_DN46009_c0_g1	49.26	11	21.714	9.05615	1.06875	0.542652	1.01985	0.814529	1.08997	0.224883
TRINITY_DN40918_c0_g1	16.31	1	14.9385	10.4478	1.7435	0.126438	0.954922	0.835305	1.66491	0.0182478
TRINITY_DN45707_c0_g2	40.59	10	41.8152	4.80518	0.864763	0.0162801	0.847818	0.00661098	0.733161	0.00293112
TRINITY_DN53484_c2_g1	44.67	15	38.4728	5.49072	0.942092	0.176549	1.2042	6.80532e-06	1.13447	0.0183386
TRINITY_DN52967_c1_g1	16.11	24	223.231	8.06006	1.24414	0.0216494	0.884329	0.0970562	1.10023	0.047307
TRINITY_DN48497_c0_g1	38	18	51.4751	6.85889	0.936439	0.00306385	0.949369	0.115984	0.889026	0.00827423
TRINITY_DN51908_c1_g5	40.76	9	27.399	8.19189	1.54193	7.45518e-05	1.49083	0.000724241	2.29875	9.42613e-05
TRINITY_DN49207_c1_g1	49.24	10	27.7926	9.72998	1.14777	0.00351523	1.19636	0.00045363	1.37314	3.94838e-05
TRINITY_DN49437_c3_g2	42.98	14	40.4854	8.49951	0.941768	0.125642	0.989332	0.567595	0.931722	0.0765246
TRINITY_DN55058_c7_g2	42.01	5	24.2501	7.89893	0.453315	0.00218734	1.14759	0.100049	0.520218	0.0040137
TRINITY_DN40875_c0_g1	42.38	8	23.8271	5.46533	1.20495	0.000384358	1.10578	0.00592619	1.3324	0.000261081
TRINITY_DN55663_c4_g4	31.9	3	25.0208	7.15186	0.692735	0.0922667	1.62875	0.00396024	1.12829	0.346323
TRINITY_DN16716_c0_g1	30.47	23	78.3316	8.60205	1.00636	0.819494	1.14749	0.00318846	1.15479	0.00346379
TRINITY_DN47141_c0_g1	42.3	20	39.9328	5.5415	1.10049	0.0922692	0.768758	0.000996957	0.846011	0.0128639
TRINITY_DN46066_c0_g1	35.97	11	66.5823	4.37354	3.02929	6.83955e-05	1.31853	0.00548705	3.99421	3.25339e-05
TRINITY_DN46449_c0_g1	27.03	9	44.2616	5.42725	1.04947	0.411045	1.25773	0.00582184	1.31995	0.000124391
TRINITY_DN49149_c1_g6	35.85	17	53.8976	7.00537	0.909169	0.124966	0.897113	0.0838173	0.815627	0.00332929
TRINITY_DN46898_c0_g1	31.62	15	54.5786	6.23975	0.595625	0.00707291	1.20548	0.0237833	0.718015	0.0224475
TRINITY_DN51055_c1_g4	51.28	6	13.5073	9.59814	1.22535	0.0183025	0.987247	0.782231	1.20972	0.00266109
TRINITY_DN44729_c1_g1	30.71	12	42.4757	5.17334	1.8878	0.000103875	1.25019	0.000744717	2.3601	3.14228e-05
TRINITY_DN48348_c0_g1	46.01	7	23.2383	6.66846	1.08078	0.441775	1.1639	0.0294174	1.25792	0.0301263
TRINITY_DN55788_c1_g3	51.3	12	36.7248	9.26123	1.2141	0.000592491	0.782981	1.26397e-05	0.950616	0.072563
TRINITY_DN50377_c1_g2	36.42	12	38.0063	4.97021	0.901733	0.0927566	1.11261	0.0480608	1.00328	0.911981
TRINITY_DN52169_c0_g1	28.68	15	69.0847	8.5874	1.17538	0.000878066	0.885501	0.0016909	1.0408	0.164393
TRINITY_DN44246_c1_g1	60.4	16	33.0659	8.86572	1.11879	0.00648	0.985344	0.505815	1.10239	0.00142507
TRINITY_DN55550_c1_g2	26.61	8	36.9488	6.0874	1.86969	0.000281326	4.40678	4.08521e-05	8.23932	2.35371e-05
TRINITY_DN56057_c3_g1	26.12	20	95.4571	7.37158	0.898103	0.221152	1.01244	0.360556	0.909278	0.271176
TRINITY_DN54275_c0_g4	43.69	12	44.2793	5.63037	2.47606	0.000176975	1.42831	0.0017976	3.53659	1.09581e-05
TRINITY_DN46876_c0_g1	54.2	11	29.0743	4.729	0.848992	0.0398642	0.745987	0.000323642	0.633337	0.00152689
TRINITY_DN38865_c0_g1	42.61	16	56.6507	6.30322	1.94502	9.18285e-06	1.81082	0.000100754	3.5221	1.44733e-05
TRINITY_DN48588_c0_g1	42.91	12	32.2454	5.36377	0.952858	0.352346	1.10049	0.251945	1.04861	0.565588
TRINITY_DN54350_c2_g3	54.87	5	12.2635	8.646	0.637397	0.0243032	1.20749	0.0957907	0.769652	0.0515724
TRINITY_DN52914_c1_g1	17.73	12	72.1868	5.98584	0.905145	0.0152882	0.827693	0.000522877	0.749182	0.00015467
TRINITY_DN53980_c0_g4	42.93	12	45.4554	5.74463	1.33343	0.00255095	0.875489	0.0152687	1.1674	0.00891746
TRINITY_DN39891_c0_g1	28.03	15	56.8549	7.79639	1.70907	0.00395288	2.67899	0.000655896	4.57859	0.000295499
TRINITY_DN54799_c0_g2	35.25	5	33.6769	5.04639	1.61	0.000392125	1.53313	0.00092394	2.46834	0.000132594
TRINITY_DN54714_c0_g3	48.08	5	17.7134	10.4771	1.40008	0.000202325	0.847544	0.00271816	1.18663	0.000499003
TRINITY_DN55572_c1_g2	29.26	22	82.8994	6.72705	1.02281	0.416288	1.00107	0.943774	1.02391	0.411219
TRINITY_DN47708_c0_g2	37.95	13	45.5955	8.08936	2.79919	1.29847e-05	1.85171	2.62956e-05	5.18328	1.53902e-06
TRINITY_DN50760_c0_g2	22.5	19	96.3059	5.57959	0.675123	1.27813e-05	1.02642	0.504102	0.692957	0.000177714
TRINITY_DN47345_c0_g1	51.92	13	31.2639	5.47803	1.0109	0.89149	1.13806	0.0736554	1.15047	0.0367697
TRINITY_DN50596_c0_g4	36.3	15	45.2027	7.85498	0.866824	0.0122138	1.19572	0.00245704	1.03648	0.263963
TRINITY_DN54138_c1_g3	33.23	9	35.0334	6.26514	1.0081	0.719506	1.08431	0.197841	1.09309	0.186672
TRINITY_DN53536_c0_g4	27.72	26	113.318	6.84424	1.09352	0.00601496	0.751965	2.60072e-05	0.822291	0.000428041
TRINITY_DN54249_c0_g1	57.41	5	11.9816	10.5063	0.972448	0.443841	0.995139	0.885088	0.967721	0.18797
TRINITY_DN51602_c1_g1	31.93	18	57.7352	8.66064	1.09757	0.0422127	0.87979	0.00551339	0.965633	0.212392
TRINITY_DN54779_c2_g8	46.41	8	22.4973	9.62744	0.974464	0.573004	2.64759	5.41018e-05	2.57998	8.37198e-05
TRINITY_DN55083_c0_g7	26.61	21	108.842	5.33838	1.00684	0.758651	1.134	7.51785e-05	1.14176	0.00254821
TRINITY_DN49257_c1_g2	45.23	10	26.0304	5.13525	0.842559	0.123238	1.25618	0.0061089	1.05841	0.489635
TRINITY_DN51320_c0_g1	38.93	5	27.6245	9.21729	0.879503	0.120697	1.38859	0.00155787	1.22127	0.014375
TRINITY_DN54118_c2_g1	49.83	12	32.2457	6.31592	1.17212	0.0121055	1.34137	4.33869e-05	1.57225	0.000130045
TRINITY_DN53202_c4_g1	15.68	20	139.791	8.19189	0.884001	0.00182619	0.949452	0.0263092	0.839317	0.000503051
TRINITY_DN49897_c0_g1	45.79	12	34.8502	7.85498	1.03775	0.181829	1.00463	0.834293	1.04255	0.143088
TRINITY_DN52799_c0_g2	22.76	23	123.535	8.88037	1.03246	0.35905	0.832117	0.00435511	0.859124	0.00112064
TRINITY_DN43866_c0_g1	57.03	17	25.598	10.5063	1.32388	0.0107911	0.632537	0.000914314	0.837403	0.0458586
TRINITY_DN55153_c0_g3	26.85	16	86.2747	7.13721	1.18333	0.00440252	1.02289	0.469873	1.21042	0.000155496
TRINITY_DN51673_c3_g1	30.91	12	48.1787	7.21045	0.340385	2.77994e-06	1.17987	0.00460657	0.401609	3.13557e-06
TRINITY_DN49878_c0_g1	44.72	18	43.1592	8.67529	0.819714	0.00687317	1.10406	0.0465601	0.905016	0.0523107
TRINITY_DN48188_c0_g1	35.83	7	35.2696	7.88428	1.26782	0.00223732	1.29909	0.00144143	1.64701	4.46046e-05
TRINITY_DN43254_c0_g1	22.17	16	81.1038	5.79541	1.03748	0.4236	0.964184	0.119989	1.00032	0.994093
TRINITY_DN51426_c0_g1	32.51	18	85.9837	5.66846	0.76028	0.000105903	0.899876	0.00480172	0.684157	2.48863e-05
TRINITY_DN53576_c0_g1	46.18	18	28.3734	10.6968	1.06391	0.210014	0.824717	0.00650771	0.877428	0.0631693
TRINITY_DN49448_c3_g1	29.52	9	48.8716	8.80713	0.74482	0.00165109	0.768021	0.00131644	0.572037	0.000214924
TRINITY_DN47463_c0_g1	56.67	8	16.2758	9.99365	2.0359	0.00347592	1.3054	0.0115865	2.65766	0.000946043
TRINITY_DN47333_c0_g1	69.57	8	12.1352	6.52197	1.33283	0.0330829	1.36848	0.0101033	1.82394	0.000268927
TRINITY_DN46485_c0_g1	42.75	6	14.4838	9.40771	1.93153	0.000646818	4.86973	0.091536	9.40605	0.0677449
TRINITY_DN51204_c3_g4	28.95	8	35.8376	4.90674	1.12007	0.124024	1.05833	0.268058	1.1854	0.0278767
TRINITY_DN47516_c0_g1	39.63	25	67.1055	8.74854	0.735377	0.000803695	1.32146	0.00771229	0.971772	0.638693
TRINITY_DN43211_c0_g2	33.2	8	26.8579	9.51025	1.14629	0.0294595	0.944189	0.0292007	1.08231	0.119999
TRINITY_DN50783_c0_g3	17.23	17	98.8405	6.32861	1.03926	0.387287	0.985253	0.589577	1.02394	0.497122
TRINITY_DN55243_c2_g5	28.03	2	40.5053	6.90283	0.773105	0.030565	0.85458	0.0220458	0.66068	0.00586042
TRINITY_DN54714_c0_g2	32.44	20	68.8873	8.36768	1.13001	0.0200618	1.20787	0.0015636	1.36491	6.89891e-05
TRINITY_DN49663_c0_g1	36.36	8	37.6475	6.62451	0.898805	0.12292	1.19303	0.0309203	1.0723	0.361271
TRINITY_DN47427_c1_g1	33.58	7	30.8968	9.45166	1.34133	9.95592e-05	1.17025	0.000511471	1.5697	8.65036e-06
TRINITY_DN51710_c3_g2	37.13	14	43.256	6.1001	1.0047	0.908052	1.53451	4.95892e-06	1.54172	0.000155692
TRINITY_DN45030_c0_g1	54.07	7	19.135	4.91943	1.64914	0.00857383	5.32458	2.08225e-06	8.78095	3.51482e-07
TRINITY_DN55524_c1_g3	30.34	8	32.3523	8.80713	1.11945	0.0798767	0.821443	0.00797741	0.919563	0.106887
TRINITY_DN44763_c0_g1	23.97	12	57.0483	7.32764	0.937162	0.267764	1.01194	0.723234	0.948351	0.272485
TRINITY_DN53549_c1_g1	11.22	24	200.934	6.32861	1.05888	0.195167	0.783441	0.000507559	0.829569	0.00727586
TRINITY_DN54232_c0_g3	24.58	2	45.1385	5.08447	0.591246	0.0148751	0.721315	0.109341	0.426475	0.00066042
TRINITY_DN52079_c0_g9	33.58	18	60.6528	6.37939	1.38254	0.000135663	1.17871	0.00195477	1.62961	2.34564e-05
TRINITY_DN53500_c1_g3	34.95	15	51.762	5.26221	1.03479	0.452053	1.11241	0.0440948	1.15111	0.00165903
TRINITY_DN53932_c2_g4	33.65	12	47.9749	6.21436	1.15915	0.0177697	1.34836	0.00212944	1.56294	0.000188733
TRINITY_DN49122_c1_g1	19.65	12	84.1366	5.18604	0.993874	0.696794	0.625072	2.94571e-05	0.621243	9.06236e-06
TRINITY_DN46717_c0_g1	33.92	18	69.5633	6.52197	1.10704	0.00204378	0.762303	5.28503e-05	0.843899	0.000353201
TRINITY_DN47807_c0_g2	25.12	16	68.1743	7.94287	1.05555	0.138711	0.881204	0.00935807	0.930156	0.0573421
TRINITY_DN45640_c0_g1	34.23	9	36.0975	7.81104	0.834189	0.00167282	1.29935	0.000705329	1.0839	0.0421827
TRINITY_DN51599_c0_g1	36.38	18	54.7778	9.23193	1.05835	0.0196847	0.98641	0.528183	1.04396	0.0654334
TRINITY_DN53247_c0_g2	49.35	9	24.4445	5.47803	1.00854	0.935675	1.20012	0.0656675	1.21037	0.0385067
TRINITY_DN52707_c0_g1	54.17	6	20.4684	5.8335	0.567297	0.00012337	0.938492	0.317605	0.532404	0.0001995
TRINITY_DN52088_c1_g4	48.36	7	13.6803	9.5542	1.36704	0.00272489	0.957433	0.346326	1.30885	0.00509586
TRINITY_DN51301_c4_g1	21.1	11	52.563	6.69775	1.07651	0.0925219	1.10626	0.0438865	1.1909	0.00303219
TRINITY_DN44858_c0_g1	31.87	14	57.6676	6.58057	1.2699	0.00107209	1.34592	0.000776257	1.70918	6.56505e-05
TRINITY_DN50684_c2_g3	44.78	19	43.7407	7.13721	2.64435	0.000165449	1.54227	0.00142349	4.07831	9.73959e-05
TRINITY_DN54155_c5_g1	43.02	14	38.1883	5.2876	1.12104	0.0977492	0.555936	0.00111657	0.623228	7.10694e-05
TRINITY_DN48804_c0_g1	14.63	15	118.763	8.1626	0.964258	0.150091	0.880719	0.00488374	0.849241	0.00045132
TRINITY_DN52957_c0_g2	18.17	16	119.412	5.30029	0.764891	0.0314832	1.06151	0.0159602	0.811941	0.0614599
TRINITY_DN54389_c0_g2	33.88	7	27.1466	8.76318	0.904003	0.0954675	1.04897	0.0539933	0.948275	0.325555
TRINITY_DN55807_c1_g2	42.37	3	12.9798	5.92236	0.688994	0.00619154	0.94473	0.444574	0.650913	0.000842111
TRINITY_DN42087_c0_g1	43.75	9	37.2838	6.11279	0.87983	0.00197893	1.19108	0.00827019	1.04794	0.204724
TRINITY_DN51194_c1_g2	33.45	8	31.6359	9.45166	1.37432	0.000937425	0.991375	0.725667	1.36246	0.00194709
TRINITY_DN51818_c1_g1	37.05	14	44.6823	7.29834	0.538643	5.16626e-05	1.45281	0.000627505	0.782546	0.000300125
TRINITY_DN49803_c0_g1	30.62	10	33.266	6.80029	1.1174	0.00351823	1.25834	0.000738122	1.40606	0.000140458
TRINITY_DN53990_c0_g1	21.44	11	58.2925	5.57959	1.16048	0.0345833	0.879175	0.0201107	1.02027	0.599877
TRINITY_DN45029_c0_g1	41.54	14	35.9136	9.17334	1.25862	0.0005025	0.855492	0.000565198	1.07674	0.0237811
TRINITY_DN55748_c1_g4	59.63	4	18.1463	6.354	0.938689	0.290042	2.86798	0.000717595	2.69214	0.000829148
TRINITY_DN55378_c1_g1	35.65	9	25.6533	8.48486	1.35452	0.000999357	1.89707	0.0120993	2.56961	0.00489967
TRINITY_DN45604_c0_g2	38.21	13	44.0216	7.29834	0.668181	0.00146487	1.14748	0.0464485	0.766726	0.00154175
TRINITY_DN52429_c3_g2	19.51	14	80.674	6.87354	0.758857	0.000150805	0.977477	0.342829	0.741765	0.000237748
TRINITY_DN44745_c0_g1	27.01	7	30.4786	6.12549	1.11053	0.047767	1.03913	0.203471	1.15398	0.0164774
TRINITY_DN52933_c4_g1	24.57	18	93.7268	5.5415	0.828841	0.00794946	0.988958	0.582057	0.819688	0.00546321
TRINITY_DN53035_c3_g2	58.42	2	11.4179	7.18115	0.76923	0.0212519	0.959386	0.618949	0.737989	0.00103713
TRINITY_DN51796_c1_g1	38.96	14	45.2679	6.62451	0.963763	0.174904	1.00055	0.981076	0.964293	0.25306
TRINITY_DN45667_c0_g2	29.79	15	68.6509	6.23975	0.773711	0.000562794	0.935536	0.084614	0.723835	2.73981e-05
TRINITY_DN54490_c1_g1	27.09	17	76.1757	8.38232	0.935238	0.100598	0.839428	0.00773413	0.785065	0.00018303
TRINITY_DN1330_c0_g1	22.96	16	80.2722	6.48096	1.01007	0.666109	0.912132	0.00557804	0.921321	0.0122179
TRINITY_DN45315_c0_g1	26.03	25	99.7106	5.04639	0.950422	0.000241311	0.901071	0.00807186	0.856397	0.00161124
TRINITY_DN51987_c1_g1	35	14	43.6343	9.43701	1.06309	0.25777	0.9785	0.70811	1.04024	0.521533
TRINITY_DN44153_c0_g1	26.59	18	82.303	9.14404	0.957278	0.0557198	0.952557	0.0702183	0.911862	0.0039434
TRINITY_DN53588_c0_g2	41.26	3	15.537	5.05908	1.45949	0.0105478	2.04939	0.000107878	2.99107	4.47859e-06
TRINITY_DN51077_c1_g3	24.5	6	31.9379	6.78564	0.78663	9.74702e-07	1.23692	8.0674e-05	0.972997	0.0755511
TRINITY_DN55326_c0_g1	46.71	10	17.1596	8.55811	1.08936	0.251343	0.954425	0.20096	1.03971	0.542192
TRINITY_DN51776_c0_g2	22.66	9	64.75	6.49365	1.01433	0.591064	1.06187	0.113769	1.07708	0.0449625
TRINITY_DN51276_c0_g9	24.59	7	44.082	6.78564	1.22371	0.0805166	1.71349	0.000890347	2.09682	1.64432e-06
TRINITY_DN35812_c0_g1	27.25	8	41.1172	8.38232	0.95774	0.347498	1.14735	0.00185187	1.09887	0.0842607
TRINITY_DN46205_c0_g1	42.05	8	21.3413	8.86572	1.11902	0.0390025	0.982306	0.63126	1.09922	0.0766764
TRINITY_DN49393_c0_g1	27.05	8	29.558	7.10791	1.40076	0.0172362	0.852887	0.0908247	1.19469	0.046885
TRINITY_DN53483_c0_g2	25.62	4	77.114	5.43994	0.927896	0.142016	0.983947	0.717791	0.913	0.177231
TRINITY_DN9853_c0_g1	36.62	19	65.1737	5.31299	0.858171	0.00481315	0.956068	0.186579	0.820469	0.000620974
TRINITY_DN43176_c0_g1	47.97	8	13.2397	9.59814	1.22807	0.0122001	1.95189	0.0397525	2.39705	0.0226134
TRINITY_DN52638_c3_g2	17.19	25	192.475	6.63916	1.06857	0.103057	0.973486	0.229237	1.04024	0.226561
TRINITY_DN43981_c0_g1	14.15	24	177.507	8.1626	0.915237	0.0495053	1.05181	0.28544	0.962657	0.32811
TRINITY_DN48894_c0_g1	29.86	28	92.5029	8.1333	1.02039	0.549292	0.935205	0.0993429	0.954273	0.115389
TRINITY_DN53474_c0_g1	43.31	17	46.3449	5.24951	0.788287	0.00989776	1.39367	0.0503742	1.09861	0.457882
TRINITY_DN55373_c2_g6	41.94	16	44.7901	7.41553	1.34395	0.00461225	1.05614	0.328436	1.41941	0.000242931
TRINITY_DN54172_c2_g1	60.21	8	19.6028	5.93506	0.998713	0.969455	1.10323	0.000812595	1.10181	0.0270995
TRINITY_DN48516_c0_g1	33.28	18	70.8487	8.99756	0.842015	0.00162049	0.700652	0.000130056	0.589959	4.02814e-05
TRINITY_DN44829_c0_g1	27.07	17	74.5198	8.22119	1.02127	0.426874	0.926442	0.0361469	0.946145	0.00242542
TRINITY_DN46462_c0_g1	33.21	13	59.8209	5.5542	1.15521	0.0943046	1.14741	0.0609227	1.3255	0.000618077
TRINITY_DN50904_c3_g3	44.03	11	29.3136	9.86182	0.866137	0.00589467	1.15045	0.0459399	0.996448	0.943387
TRINITY_DN47249_c0_g1	33.54	12	54.0163	4.67822	0.464766	0.000116935	0.921227	0.268224	0.428155	1.96928e-05
TRINITY_DN53071_c1_g1	21.26	34	163.593	6.88818	1.12534	0.00187782	0.790572	0.000112268	0.889663	0.00663308
TRINITY_DN48401_c0_g1	63.08	11	14.7061	11.2974	1.0862	0.625908	1.20899	0.261072	1.31321	0.0205531
TRINITY_DN51847_c3_g1	57.64	8	22.5763	7.06396	0.793681	0.0295918	1.07855	0.193071	0.85602	0.0985364
TRINITY_DN49537_c2_g8	33.71	9	38.2396	5.94775	0.971793	0.200783	0.906647	0.0290705	0.881073	0.00478272
TRINITY_DN55320_c0_g5	8.13	35	437.979	7.45947	1.06772	0.260461	0.792987	0.014562	0.846692	0.0029333
TRINITY_DN49891_c1_g1	53.02	3	24.1713	5.93506	0.801468	0.0205434	0.831096	0.0603593	0.666097	0.00202011
TRINITY_DN52924_c2_g1	23.19	15	65.4601	6.82959	0.904738	0.0158348	0.90842	0.0334414	0.821882	0.00650023
TRINITY_DN56000_c1_g1	29.12	17	92.784	7.95752	1.0168	0.644065	1.03031	0.415313	1.04762	0.174088
TRINITY_DN48384_c0_g1	25.61	16	70.8407	8.29443	1.22732	0.000588182	0.873311	0.00206694	1.07183	0.0249443
TRINITY_DN49714_c0_g4	66.67	11	30.8194	8.82178	0.918913	0.239586	1.58969	0.00137371	1.46079	0.00359689
TRINITY_DN48632_c0_g1	33.4	15	56.1528	9.02686	1.21858	0.00495632	0.833106	0.00186063	1.0152	0.718959
TRINITY_DN53415_c1_g2	21.21	23	125.681	5.92236	0.934907	0.115906	1.24923	0.00543306	1.16792	0.032311
TRINITY_DN45345_c1_g1	33.01	22	81.1587	5.97314	0.96998	0.261474	0.928058	0.0273439	0.900198	0.019399
TRINITY_DN49454_c3_g7	24.84	1	17.53	7.94287	0.638231	0.342362	1.28831	0.419556	0.822242	0.599573
TRINITY_DN54204_c1_g1	13.14	19	158.919	5.99854	1.09206	0.012922	0.896805	0.00696906	0.979366	0.123551
TRINITY_DN51682_c1_g8	51.98	7	20.0596	6.96143	0.950535	0.678423	1.11646	0.140427	1.06124	0.641295
TRINITY_DN53222_c1_g1	13.77	4	36.3435	4.85596	0.613448	0.00920094	0.927015	0.141222	0.568676	0.00648433
TRINITY_DN52040_c3_g2	40.82	9	28.5057	7.02002	0.993358	0.933911	0.829335	0.089854	0.823827	0.000784265
TRINITY_DN48698_c0_g2	40.06	14	37.4099	6.45557	1.07557	0.0449533	1.31635	0.000171149	1.41583	0.000190311
TRINITY_DN49421_c1_g8	26.97	8	37.1806	4.90674	1.29944	0.00299984	0.875065	0.0104181	1.1371	0.048512
TRINITY_DN55676_c0_g5	29.74	5	50.618	8.73389	1.00994	0.777914	1.06476	0.125349	1.07534	0.00601167
TRINITY_DN49911_c1_g1	38.29	10	40.5866	6.39209	1.42988	0.00591712	1.09073	0.16664	1.55962	0.000368758
TRINITY_DN53714_c1_g1	59.75	12	24.8132	10.3745	1.23258	0.0486865	0.705136	0.00607729	0.869137	0.141253
TRINITY_DN52079_c0_g4	25.53	9	47.0898	4.94482	0.478421	0.00328444	1.05048	0.261844	0.502571	0.00357324
TRINITY_DN54638_c0_g1	29.5	17	78.1315	8.03076	1.19027	0.000468709	0.882776	0.00131141	1.05074	0.0660719
TRINITY_DN52431_c1_g5	30	11	35.5394	5.04639	1.0962	0.0545262	0.907082	0.055442	0.994346	0.769468
TRINITY_DN54236_c2_g2	28.7	2	11.6322	5.47803	1.27096	0.016111	2.1174	0.000800301	2.69114	0.000530752
TRINITY_DN49728_c2_g3	44.82	15	39.8137	8.26514	0.925238	0.070541	0.82117	0.00369227	0.759778	0.000224012
TRINITY_DN50773_c1_g2	46.25	14	37.0111	4.76709	0.621957	0.0047332	0.665361	0.00141808	0.413826	0.000813319
TRINITY_DN49346_c0_g3	40.78	12	38.8218	6.771	1.01958	0.758699	1.47523	0.0015261	1.50411	0.000988502
TRINITY_DN54190_c5_g1	26.15	20	83.9222	5.8208	1.0974	0.0303669	1.35021	0.00270381	1.48172	0.0010106
TRINITY_DN53280_c1_g1	38.14	7	23.7375	7.00537	1.24444	0.0124919	0.909917	0.135184	1.13234	0.123365
TRINITY_DN53490_c0_g2	16.28	27	204.045	5.97314	0.851118	0.000685344	0.96583	0.0296184	0.822035	0.00033688
TRINITY_DN47940_c0_g1	15.49	8	74.8337	7.69385	0.628997	0.00177099	0.783401	0.0261281	0.492756	0.00010949
TRINITY_DN55000_c0_g2	19.1	16	108.359	6.0874	0.99369	0.827704	1.04047	0.133534	1.0339	0.27011
TRINITY_DN52304_c6_g1	38.92	5	20.5466	7.38623	1.18595	0.00591764	0.981321	0.673142	1.1638	0.0135889
TRINITY_DN52111_c1_g1	14.28	29	214.697	7.44482	1.22577	0.000678339	0.925814	0.0046496	1.13483	0.00859795
TRINITY_DN52226_c3_g9	26.8	9	39.8704	5.18604	0.711661	0.0370017	1.42349	0.120721	1.01304	0.943499
TRINITY_DN55625_c4_g1	13.41	18	171.008	5.96045	1.01724	0.238606	0.832775	0.000276447	0.847132	0.00062415
TRINITY_DN49763_c1_g1	32.39	17	51.2865	6.01123	1.29425	0.0011609	0.8994	0.0132882	1.16405	0.00277315
TRINITY_DN53798_c1_g1	60.41	8	22.0923	9.62744	2.22661	0.000737319	1.31854	0.00602164	2.93588	6.51021e-06
TRINITY_DN48510_c3_g6	61.76	1	15.2745	11.2974	1.24984	0.591927	0.724089	0.220893	0.904996	0.810758
TRINITY_DN55952_c3_g1	19.6	12	70.9748	5.08447	1.08763	0.160502	1.04459	0.0599821	1.13613	0.0571222
TRINITY_DN50527_c1_g2	20.82	18	97.6648	6.85889	1.15563	0.0157524	0.97728	0.51661	1.12937	0.00491936
TRINITY_DN47720_c0_g1	35.42	6	25.5077	8.71924	1.26996	0.00424917	1.20031	0.00745453	1.52435	5.67474e-05
TRINITY_DN48144_c0_g1	73.58	4	11.8698	4.37354	1.05887	0.50859	1.26074	0.0240236	1.33496	0.0021861
TRINITY_DN55657_c1_g2	27.53	10	50.3965	6.07471	1.05881	0.0779797	1.09977	0.0736394	1.16445	0.0122773
TRINITY_DN54149_c0_g4	41.14	17	50.3732	6.72705	0.946249	0.00171053	1.26976	2.33624e-05	1.20151	4.0296e-05
TRINITY_DN49210_c1_g1	32.23	15	46.8789	6.07471	0.944329	0.052205	1.05239	0.414833	0.993798	0.909851
TRINITY_DN53412_c3_g1	18.79	6	38.7142	6.52197	1.4654	0.000928872	1.30846	0.00302641	1.91742	8.89951e-05
TRINITY_DN51253_c0_g6	19.8	11	109.917	5.66846	1.50504	0.00197604	0.869398	0.000738103	1.30847	0.0109977
TRINITY_DN47297_c0_g3	16.56	5	49.8563	8.73389	0.595909	0.0662074	1.632	0.0489196	0.972521	0.901277
TRINITY_DN52952_c0_g1	26.71	22	92.9073	6.55127	1.22694	0.00169915	0.46585	2.20679e-05	0.571568	3.15833e-06
TRINITY_DN51343_c2_g1	29.32	18	81.4371	6.68311	1.07937	0.0193181	0.891572	0.0057385	0.96234	0.224999
TRINITY_DN52077_c1_g1	24.75	25	112.823	5.03369	1.41551	0.000217515	0.767477	0.000421801	1.08637	0.00455537
TRINITY_DN51762_c0_g1	35.73	15	57.7325	4.98291	1.64222	0.00292812	0.859212	0.0348698	1.41102	0.0110683
TRINITY_DN49453_c4_g2	23.41	15	74.3191	6.39209	1.67212	0.00052018	1.16409	0.0261945	1.9465	7.13911e-05
TRINITY_DN50826_c1_g1	20.14	3	33.3203	5.75732	1.18011	0.0326166	0.87599	0.0495176	1.03376	0.368936
TRINITY_DN54309_c0_g1	17.63	25	156.41	6.55127	1.59704	0.00023395	1.06696	0.0873818	1.70399	1.51457e-06
TRINITY_DN50214_c0_g1	54.96	6	13.9439	8.48486	1.16256	0.121517	0.95649	0.554917	1.11198	0.0151893
TRINITY_DN46592_c0_g1	46.2	14	37.7756	8.52881	0.952606	0.146978	0.836882	0.000212316	0.797219	0.00142976
TRINITY_DN48491_c5_g3	61.71	10	18.9091	9.33447	1.12306	0.0826277	1.10694	0.102804	1.24316	0.00623696
TRINITY_DN50602_c0_g2	43.53	11	25.1938	10.4038	0.983983	0.899989	1.2069	0.036756	1.18757	0.138468
TRINITY_DN52273_c1_g5	17.37	20	141.401	5.70654	0.970766	0.27752	0.925619	0.02581	0.898559	0.0132823
TRINITY_DN55954_c2_g2	32.12	22	70.1188	6.84424	0.808907	0.0320687	1.00214	0.970286	0.810637	0.0294521
TRINITY_DN53684_c2_g1	26.32	27	115.41	7.88428	1.63527	0.000839146	1.21674	0.00423456	1.98969	1.59502e-05
TRINITY_DN52530_c2_g1	25.9	12	57.549	8.27979	0.987328	0.852359	1.23769	0.0128063	1.22201	0.00255876
TRINITY_DN53923_c1_g2	16.25	7	57.0159	5.22412	1.06464	0.235101	0.818958	0.0117257	0.871897	0.00226961
TRINITY_DN55631_c0_g2	34.54	25	78.096	5.14795	1.14546	0.000231202	1.13029	0.000250789	1.29471	6.01035e-05
TRINITY_DN43682_c0_g1	41.06	18	50.8461	8.1626	0.619624	0.000705316	1.13237	0.00493164	0.701646	0.00210611
TRINITY_DN45752_c1_g2	31.19	13	58.1077	6.69775	0.890406	0.127846	1.04204	0.415579	0.927838	0.214806
TRINITY_DN51673_c3_g3	56.44	7	21.5552	8.01611	0.697443	0.00291836	1.19931	0.000161962	0.836449	0.0263927
TRINITY_DN55748_c1_g7	57.26	3	13.3221	8.39697	1.42415	0.00249206	3.25409	5.18721e-05	4.63431	3.53932e-05
TRINITY_DN44776_c1_g1	41.8	4	13.4447	8.49951	1.54687	0.00025172	1.65786	0.000561126	2.56449	7.81359e-05
TRINITY_DN52979_c1_g2	32.55	8	33.3195	5.97314	0.745077	0.264221	1.0172	0.871004	0.757892	0.260312
TRINITY_DN52552_c1_g2	21.66	7	86.1048	7.03467	0.895681	0.0612367	1.04855	0.212437	0.939166	0.231331
TRINITY_DN55551_c0_g1	17.45	20	124.588	5.52881	1.2342	0.000753791	0.851362	0.00698782	1.05075	0.129935
TRINITY_DN54668_c4_g1	22.88	7	35.8082	6.25244	0.922058	0.135963	1.62945	0.000244097	1.50245	0.00114854
TRINITY_DN47886_c0_g2	31.1	10	49.2091	8.22119	1.88382	0.000155522	1.94278	0.000203064	3.65985	2.69429e-05
TRINITY_DN55503_c2_g1	19.15	12	81.3549	6.50732	0.982989	0.546727	1.01548	0.66122	0.998207	0.962722
TRINITY_DN54030_c0_g1	19.26	20	121.618	6.53662	1.55245	0.000538061	1.12372	0.0491379	1.74453	9.77136e-05
TRINITY_DN50542_c2_g1	30.79	11	37.3962	6.69775	0.676015	0.00219031	1.12502	0.0333398	0.760528	0.0069624
TRINITY_DN52664_c1_g1	51.79	9	19.1028	8.38232	0.735676	0.00798352	1.06532	0.244845	0.783729	0.0207243
TRINITY_DN54399_c1_g2	23.3	13	73.886	5.66846	0.905716	0.0283205	1.08088	0.0442095	0.978967	0.436351
TRINITY_DN56063_c5_g2	69.77	8	14.5195	8.08936	0.755619	0.0160203	1.03504	0.502803	0.782095	0.0261793
TRINITY_DN50281_c0_g1	36.94	10	25.9787	9.96436	0.967996	0.547072	0.983548	0.699897	0.95207	0.310586
TRINITY_DN53420_c1_g1	16.35	19	146.399	6.07471	1.07557	0.0237514	0.914455	0.0220686	0.983561	0.544196
TRINITY_DN51576_c0_g1	64.23	1	14.7327	4.64014	0.473118	0.00123463	0.928147	0.188332	0.439123	0.000814906
TRINITY_DN52114_c0_g6	46.91	9	17.981	4.81787	0.490912	0.038116	3.21986	0.00463414	1.58067	0.0821477
TRINITY_DN44650_c0_g1	30.03	13	38.8669	5.40186	1.0616	0.187314	1.03342	0.358653	1.09708	0.0389001
TRINITY_DN52319_c0_g5	28.94	14	56.1388	5.50342	1.24092	0.0146027	1.1728	0.0293029	1.45536	0.00183908
TRINITY_DN55588_c0_g1	39.42	11	39.6065	10.3306	1.57816	0.000297378	0.871433	0.0192329	1.37526	0.000492402
TRINITY_DN54010_c2_g4	35.96	12	34.8071	4.53857	1.11578	0.0497952	0.872407	0.0239385	0.97341	0.231477
TRINITY_DN51066_c0_g4	34.71	10	40.6312	5.2749	0.856358	0.0520481	0.975733	0.599341	0.835577	0.0426043
TRINITY_DN54202_c0_g2	35.65	4	23.2443	7.6792	0.93752	0.529462	2.24459	0.000131648	2.10435	6.86803e-05
TRINITY_DN51142_c0_g2	41.83	10	28.5006	6.16357	0.880949	0.0266582	1.40872	0.000300883	1.24101	0.00315237
TRINITY_DN48300_c1_g1	29.22	16	55.2248	6.27783	0.923836	0.266941	0.961108	0.536528	0.887906	0.0434587
TRINITY_DN53729_c0_g1	32.66	15	53.8041	7.25439	1.11795	0.00106817	0.966121	0.126051	1.08008	0.0109571
TRINITY_DN51407_c2_g1	78.46	11	14.1245	9.5835	1.6087	0.00839341	1.81067	0.00131499	2.91283	0.000166687
TRINITY_DN46247_c0_g1	31.29	14	78.2612	6.45557	0.940448	0.649117	2.90311	0.000457699	2.73023	0.000780048
TRINITY_DN45054_c0_g1	18.77	19	111.614	6.63916	1.0475	0.028155	1.03361	0.10467	1.0827	0.00504182
TRINITY_DN51805_c1_g2	34.24	12	44.9553	8.47021	0.612203	0.000358374	1.30301	0.00152731	0.797709	0.00626132
TRINITY_DN49723_c3_g1	68.48	12	18.7322	10.3599	1.07914	0.142113	0.977957	0.576019	1.05535	0.0839878
TRINITY_DN48510_c3_g7	73.68	1	12.9032	10.7993	1.78991	0.284906	0.610275	0.23564	1.09234	0.835662
TRINITY_DN52914_c0_g1	42.68	14	35.3741	6.7417	0.889739	0.161955	1.25942	0.0456771	1.12056	0.187338
TRINITY_DN46498_c0_g1	27.38	15	66.3285	6.11279	1.01761	0.580861	0.799368	0.000875533	0.813444	0.00247611
TRINITY_DN50700_c5_g2	14.51	17	128.116	6.50732	1.21199	0.126127	1.05536	0.481693	1.27909	0.0179023
TRINITY_DN54883_c0_g4	23.66	10	80.7312	6.68311	1.55603	4.70387e-05	0.997514	0.91148	1.55216	3.02917e-05
TRINITY_DN54353_c0_g1	27.37	18	70.4719	6.44287	0.875698	0.0276426	1.15747	0.0235582	1.01359	0.674259
TRINITY_DN49801_c1_g1	31.53	8	45.99	6.7417	1.03532	0.489076	0.965079	0.493395	0.99917	0.975004
TRINITY_DN53360_c0_g2	37.97	13	43.1434	8.41162	1.14564	0.0853123	0.939262	0.335954	1.07606	0.0507213
TRINITY_DN52134_c2_g2	48.32	5	16.9016	8.92432	1.13872	0.0829614	0.963951	0.493256	1.09767	0.199047
TRINITY_DN51380_c0_g1	19.88	13	55.8151	7.13721	1.03834	0.46777	1.11313	0.0372854	1.15581	0.00924496
TRINITY_DN52665_c1_g1	31.23	19	62.3205	4.70361	0.993404	0.842218	0.953682	0.143847	0.947392	0.121344
TRINITY_DN50226_c0_g1	17.63	11	77.6049	5.98584	1.2654	0.00435809	0.928202	0.130889	1.17455	0.00329498
TRINITY_DN54932_c0_g1	28.23	17	80.9832	6.15088	1.30449	0.00792887	0.800629	0.0224658	1.04441	0.424751
TRINITY_DN50952_c0_g3	18.54	24	140.118	7.7085	1.00223	0.858723	0.817645	0.00231533	0.819466	0.00222929
TRINITY_DN48315_c0_g4	23.34	11	97.21	6.21436	0.746177	0.00464567	1.02302	0.542191	0.763355	0.00447699
TRINITY_DN52688_c0_g1	31.57	13	57.4199	4.90674	0.365441	0.000567812	0.848586	0.165951	0.310108	0.000368517
TRINITY_DN47602_c0_g1	11.19	3	29.0945	8.99756	1.35155	0.00292915	0.990104	0.747917	1.33818	0.00173948
TRINITY_DN46210_c0_g1	27.02	8	35.1519	5.99854	1.47325	0.0127756	1.34494	0.00905472	1.98142	0.000221405
TRINITY_DN46161_c0_g1	20.04	9	56.463	9.08545	1.98606	0.000174145	1.50225	0.00173344	2.98355	8.16962e-05
TRINITY_DN48879_c0_g2	56.64	10	16.2979	10.1548	1.04453	0.0986545	0.905029	0.0622965	0.945327	0.196597
TRINITY_DN51821_c0_g1	27.12	15	71.0509	6.11279	1.18399	0.00909508	1.06432	0.216329	1.26014	0.00568876
TRINITY_DN49018_c0_g1	23.36	9	59.8248	5.2749	1.2937	0.0205953	0.769351	0.00351685	0.995311	0.944377
TRINITY_DN55955_c0_g1	28.93	15	62.0139	5.32568	1.45727	0.00359865	0.946146	0.226273	1.37879	0.00320104
TRINITY_DN50735_c0_g3	13.55	19	168.687	6.13818	1.07779	0.0356655	1.04035	0.138249	1.12128	0.0151355
TRINITY_DN49127_c0_g1	36.43	14	44.8163	5.97314	0.758505	0.0348523	1.30499	0.0901694	0.989841	0.937208
TRINITY_DN52169_c0_g2	25.33	9	48.5694	7.81104	1.33122	0.000184111	1.05451	0.19366	1.40378	0.0010392
TRINITY_DN53631_c2_g3	54.62	8	14.7697	10.0083	1.06059	0.577525	1.02711	0.728758	1.08933	0.26578
TRINITY_DN47459_c0_g1	53.72	5	21.0483	6.96143	1.04296	0.675556	0.824344	0.120734	0.859754	0.00852374
TRINITY_DN53017_c1_g3	39.02	16	42.0059	7.00537	1.03471	0.504959	0.832821	0.0211382	0.861732	0.00362349
TRINITY_DN51311_c1_g4	23	7	31.7317	5.22412	1.0644	0.289083	1.26005	0.00124081	1.3412	0.00440217
TRINITY_DN53445_c4_g1	31.34	12	44.5199	6.78564	0.898136	0.125439	1.13339	0.107006	1.01794	0.61075
TRINITY_DN54757_c0_g3	42.11	4	16.9738	5.75732	1.59543	0.0119146	3.24806	1.1866e-05	5.18205	1.08365e-05
TRINITY_DN56060_c1_g1	25.31	13	71.0785	9.78857	1.12678	0.0106503	0.946607	0.0666941	1.06662	0.116656
TRINITY_DN51844_c1_g2	13.29	15	127.31	6.65381	1.12504	0.0374492	0.867569	0.00648997	0.97605	0.616167
TRINITY_DN52580_c0_g7	21.87	21	113.169	5.79541	1.68389	8.67216e-06	1.10107	0.0092772	1.85408	8.13538e-06
TRINITY_DN47849_c0_g1	31.07	13	46.3088	5.69385	1.12312	0.0347522	0.882469	0.02647	0.991118	0.856787
TRINITY_DN48078_c0_g1	33.63	17	62.674	6.63916	2.50073	4.25106e-05	1.9093	0.000237168	4.77464	2.17766e-05
TRINITY_DN52551_c2_g3	15.23	1	38.4418	5.96045	1.03826	0.756718	0.916894	0.658671	0.951972	0.773742
TRINITY_DN52327_c1_g2	30.74	6	29.1217	5.64307	0.656141	0.00554945	0.770061	0.0127792	0.505269	0.000816225
TRINITY_DN49959_c0_g3	63.57	10	14.9455	4.91943	0.884089	0.0264213	2.50416	0.000317769	2.2139	0.000470034
TRINITY_DN46993_c0_g1	32.51	6	26.3328	9.53955	0.904346	0.0181265	1.13866	0.000626607	1.02974	0.252027
TRINITY_DN49955_c0_g1	24.2	9	47.5765	7.25439	0.982106	0.590624	1.26154	0.00439784	1.23897	0.0105513
TRINITY_DN45788_c1_g1	37.5	8	37.5202	9.0415	1.69321	2.91643e-05	1.29687	0.000247756	2.19588	3.90578e-06
TRINITY_DN52182_c1_g1	38.95	8	31.4447	8.00146	0.847519	0.0361044	0.863144	0.0232697	0.731531	0.00512687
TRINITY_DN50258_c3_g1	41.52	13	32.6892	5.22412	0.712639	0.0150716	1.06364	0.608009	0.757989	0.0744929
TRINITY_DN50030_c0_g2	26.17	14	63.2871	5.90967	0.729356	0.00227074	1.20801	0.00114683	0.881069	0.0380995
TRINITY_DN56055_c1_g2	32.22	8	37.1894	6.11279	0.952221	0.655576	1.11216	0.32663	1.05902	0.174194
TRINITY_DN55676_c0_g1	35.05	2	35.7712	7.79639	0.975616	0.525383	1.00086	0.982995	0.976457	0.353993
TRINITY_DN42112_c0_g1	21.92	8	44.3036	9.12939	1.00182	0.934027	0.941431	0.0583161	0.943147	0.0446295
TRINITY_DN45184_c0_g1	48.85	17	43.7321	6.94678	0.889066	0.0730123	0.991468	0.850899	0.881481	0.0210294
TRINITY_DN50040_c0_g2	36.08	7	21.4483	8.38232	0.954564	0.59071	4.53123	3.29073e-05	4.32535	4.60195e-05
TRINITY_DN44391_c0_g2	56.16	16	24.7863	9.43701	1.18635	0.168567	1.99212	0.000135912	2.36335	0.000136923
TRINITY_DN46116_c0_g1	27.97	8	40.2833	7.02002	0.904505	0.0432622	1.11998	0.0466369	1.01303	0.646283
TRINITY_DN53522_c0_g1	22.86	18	98.7576	7.78174	0.918194	0.00222324	1.04687	0.0157794	0.961234	0.021372
TRINITY_DN53456_c1_g1	8.7	5	79.6498	9.20264	1.63661	0.00326097	1.25811	0.0178316	2.05903	9.44916e-05
TRINITY_DN52352_c0_g1	25.95	9	37.4128	9.64209	0.840879	0.021349	0.695551	0.000223932	0.584874	0.000535663
TRINITY_DN53756_c2_g1	31.22	11	52.0114	6.7417	0.9475	0.0315129	0.824519	0.000122047	0.781232	5.36235e-05
TRINITY_DN47856_c0_g1	49.59	4	13.5816	6.50732	1.0847	0.264002	0.952135	0.536663	1.03278	0.699845
TRINITY_DN53245_c1_g2	28.8	8	40.1919	6.22705	3.16311	0.000109713	1.47563	0.00212262	4.66759	2.83073e-05
TRINITY_DN47213_c0_g1	53.98	2	19.988	5.04639	1.06475	0.281997	2.50174	0.000439639	2.66374	0.00044493
TRINITY_DN45553_c0_g3	25.38	14	59.0542	6.01123	1.18648	0.0141211	1.27552	0.00449701	1.51337	0.000233476
TRINITY_DN44384_c0_g1	34.56	17	56.8435	4.81787	1.28989	0.0214834	0.864611	0.000415055	1.11526	0.216438
TRINITY_DN49712_c2_g1	21.71	12	69.6204	5.89697	1.05448	0.0591713	0.943271	0.0513946	0.994656	0.740455
TRINITY_DN49348_c4_g1	43.83	14	36.2264	9.68604	0.737082	0.00172585	0.992488	0.842158	0.731545	0.00171009
TRINITY_DN48286_c1_g1	35.66	9	29.7899	8.83643	1.29792	0.00229952	1.04389	0.0808592	1.35488	0.00112593
TRINITY_DN51289_c1_g2	27.91	12	57.6311	6.91748	0.937362	0.277181	0.857567	0.0462474	0.803851	0.0107493
TRINITY_DN49134_c1_g1	18.24	11	92.2576	6.78564	1.30967	0.000285677	1.03591	0.374441	1.35671	0.000893091
TRINITY_DN50781_c0_g2	53.39	6	12.8438	10.3599	1.23928	0.00170929	0.92753	0.0302698	1.14947	0.00230635
TRINITY_DN43717_c0_g1	43.44	11	26.3996	9.48096	1.02986	0.335694	1.00858	0.671792	1.03869	0.237634
TRINITY_DN49802_c2_g2	27.03	17	83.9649	4.71631	1.03257	0.244678	1.1235	0.00930123	1.16009	0.000460004
TRINITY_DN54982_c1_g4	19.16	8	42.1805	8.44092	1.56507	0.000405081	1.26199	0.000594311	1.9751	1.00351e-05
TRINITY_DN45783_c0_g1	61.79	7	13.65	4.95752	1.49613	0.00259863	1.66981	0.000390572	2.49826	3.9569e-05
TRINITY_DN44194_c0_g3	20.86	8	44.126	8.88037	1.15953	0.000878769	1.17145	0.00240253	1.35833	0.00018233
TRINITY_DN44149_c0_g2	17.19	9	100.079	8.52881	1.07055	0.336704	0.826651	0.0273967	0.88497	0.0380309
TRINITY_DN53728_c1_g2	27.83	12	43.4485	8.51416	0.938142	0.281425	0.851018	0.0395918	0.798375	0.000374819
TRINITY_DN53512_c0_g1	11.84	29	267.352	5.60498	1.15746	0.00677475	0.878848	0.00417469	1.01723	0.662591
TRINITY_DN47422_c0_g1	30.58	6	22.4926	6.55127	2.23886	0.00111087	2.31209	7.30342e-05	5.17643	2.95383e-06
TRINITY_DN47591_c0_g1	4.35	1	92.4564	4.86865	0.720257	0.0673217	1.00896	0.940498	0.726709	0.0298426
TRINITY_DN38085_c0_g1	56.45	13	30.3427	5.36377	2.05075	1.14478e-05	1.78661	0.00286249	3.6639	0.000421359
TRINITY_DN54883_c0_g1	21.63	12	80.7258	7.34229	0.762989	0.105134	0.991481	0.576973	0.756489	0.0975517
TRINITY_DN51164_c0_g2	31.81	15	53.5801	6.65381	1.06167	0.0535433	1.18473	0.00521165	1.25778	0.00222179
TRINITY_DN52316_c0_g4	22.04	15	81.7701	7.78174	0.993995	0.736285	1.25521	7.23571e-05	1.24767	4.74342e-06
TRINITY_DN51673_c3_g2	32	8	35.8324	5.71924	0.71547	0.000135437	1.16761	0.0212264	0.83539	0.010143
TRINITY_DN49541_c0_g2	44.72	8	14.3948	10.6089	1.00256	0.950315	0.948694	0.237166	0.951124	0.0653679
TRINITY_DN47502_c0_g1	31.83	10	43.6612	5.40186	1.10464	0.0213068	0.992652	0.871808	1.09652	0.104215
TRINITY_DN52264_c0_g2	30.23	9	38.2441	8.39697	2.04831	0.00160685	3.15801	6.92974e-05	6.46859	2.01907e-05
TRINITY_DN52943_c1_g1	34.96	20	67.5024	6.3667	0.887034	0.0178981	1.00639	0.764012	0.892702	0.0202548
TRINITY_DN43914_c0_g1	58.74	5	16.5061	6.53662	0.916119	0.0518164	1.17488	0.0792536	1.07633	0.30706
TRINITY_DN47481_c0_g1	38.57	8	30.8719	7.37158	1.00751	0.783845	1.02461	0.348943	1.0323	0.142029
TRINITY_DN53203_c0_g1	41.62	7	19.2219	8.54346	3.68651	3.96769e-06	1.48162	0.000304955	5.46202	4.65601e-06
TRINITY_DN55368_c2_g2	20.86	5	47.1229	5.89697	0.567131	0.00581587	0.880501	0.252093	0.499359	0.00238508
TRINITY_DN46679_c0_g2	42.7	6	19.8062	6.91748	1.13036	0.0419277	1.08306	0.17083	1.22424	0.00833596
TRINITY_DN49111_c0_g1	24.51	6	27.7713	7.53271	1.30436	2.12625e-05	1.70896	2.16281e-06	2.22909	1.09917e-06
TRINITY_DN52039_c0_g2	32.13	9	35.7069	4.77979	1.02064	0.71751	1.25197	0.00233231	1.27781	0.00312756
TRINITY_DN51106_c0_g3	37.39	15	52.7919	5.22412	1.04006	0.163676	0.98155	0.240676	1.02087	0.365019
TRINITY_DN45304_c0_g1	39.33	10	30.2238	7.23975	0.562883	0.000586741	0.954454	0.0593926	0.537245	0.000502633
TRINITY_DN47545_c0_g1	48.9	13	37.0703	6.69775	1.39133	0.0197772	2.21262	0.000249356	3.07848	0.00014972
TRINITY_DN49663_c0_g2	48.63	7	16.4236	8.32373	0.641694	0.0326443	0.783554	0.106234	0.502802	0.0149097
TRINITY_DN46203_c0_g1	23.11	26	114.244	8.44092	0.763405	0.000295185	0.944039	0.113449	0.720684	0.000574845
TRINITY_DN48672_c3_g3	35.84	12	45.5118	7.32764	1.18341	0.00102123	0.806437	0.000755321	0.954349	0.105388
TRINITY_DN50642_c2_g1	27.73	6	35.6406	8.99756	1.09403	0.17136	0.807197	0.0124981	0.883094	0.0263911
TRINITY_DN51177_c0_g1	27.76	11	41.7883	5.70654	0.883718	0.0132309	0.874547	0.0133939	0.772853	0.000113766
TRINITY_DN52906_c0_g1	29.08	9	27.1511	6.63916	0.962501	0.286487	1.25167	0.00345159	1.20474	0.0113456
TRINITY_DN45353_c0_g1	22.36	18	99.1189	6.60986	1.77708	3.53059e-05	0.523747	1.10359e-05	0.930738	0.0597528
TRINITY_DN49996_c0_g1	43.56	11	25.4255	9.75928	0.317393	0.00100276	1.22659	0.0897784	0.38931	0.00146816
TRINITY_DN48845_c0_g1	35.09	13	44.7324	8.85107	0.935816	0.136553	0.897707	0.0383936	0.840089	0.000864109
TRINITY_DN48874_c0_g1	22.3	12	65.5358	8.1333	1.30143	0.000984889	1.14419	0.00603859	1.48909	3.6698e-07
TRINITY_DN51407_c1_g1	33.59	12	58.0283	8.06006	1.06722	0.0388947	0.579986	6.02241e-05	0.618972	9.93805e-06
TRINITY_DN50529_c0_g1	28.06	8	31.666	6.30322	1.10996	0.00615137	0.973009	0.230722	1.08	0.00383936
TRINITY_DN52823_c3_g2	19.46	16	82.9057	8.77783	0.789702	0.0400059	1.072	0.307551	0.846561	0.0585415
TRINITY_DN53722_c0_g2	21.88	20	113.642	6.52197	0.843363	0.00526621	0.978986	0.374944	0.825641	0.00221155
TRINITY_DN52397_c0_g1	33.14	1	18.6869	8.08936	0.689576	0.0296479	0.946911	0.693402	0.652967	0.00413985
TRINITY_DN49788_c0_g1	11.59	5	57.4227	8.1333	1.10854	0.00405434	1.17204	0.0156824	1.29925	0.00389101
TRINITY_DN50745_c0_g1	24.59	11	60.8629	4.729	0.466099	3.06667e-05	0.843894	0.0114924	0.393338	1.09841e-05
TRINITY_DN53020_c3_g1	11.13	6	72.2525	5.2876	0.785594	0.00652971	0.996675	0.949651	0.782982	0.00426523
TRINITY_DN55393_c4_g6	17.36	11	95.3593	6.34131	0.710662	0.00145263	1.07759	0.18862	0.765803	0.000920442
TRINITY_DN52352_c0_g2	29.76	10	40.9947	9.53955	0.849033	0.000414379	0.756308	0.000730866	0.64213	7.22006e-05
TRINITY_DN52704_c5_g1	47.77	13	27.8439	8.23584	1.02046	0.777365	0.809273	0.000741967	0.825834	0.0574593
TRINITY_DN47263_c0_g1	37.59	9	31.0565	5.33838	1.25881	0.00138075	0.85921	0.00504481	1.08158	0.0217237
TRINITY_DN51025_c0_g2	90.38	3	11.5273	4.37354	1.14202	0.317829	0.613581	0.00492798	0.700718	0.0494219
TRINITY_DN16888_c0_g1	36.94	16	42.4905	5.80811	0.714755	0.000160619	0.772101	0.00081939	0.551863	1.06412e-05
TRINITY_DN53453_c0_g4	35.45	7	20.8203	5.07178	1.1175	0.073852	1.16387	0.0356682	1.30062	0.00685586
TRINITY_DN8148_c0_g1	22.66	12	53.8124	6.65381	1.05059	0.423557	0.964862	0.553083	1.01368	0.778536
TRINITY_DN50088_c4_g2	32.8	12	42.8205	7.1958	1.92635	0.000671478	1.31413	0.00924546	2.53147	0.000354868
TRINITY_DN46323_c0_g1	22.5	11	62.8258	7.10791	0.872505	0.00225084	0.999423	0.977652	0.872001	0.00116807
TRINITY_DN55667_c0_g1	26.59	9	44.6936	6.45557	1.01917	0.601054	0.759188	0.00154604	0.77374	0.00105521
TRINITY_DN47675_c0_g1	11.48	19	184.188	5.75732	1.00644	0.722167	0.967269	0.19755	0.973495	0.208075
TRINITY_DN53043_c0_g2	34.24	19	66.7995	5.78271	1.19674	0.0538058	1.13753	0.0443505	1.36132	0.00181843
TRINITY_DN50279_c0_g1	19.74	20	108.805	6.04932	1.02074	0.306936	0.963838	0.0981344	0.983832	0.414107
TRINITY_DN55907_c1_g1	16.21	7	132.503	7.57666	0.944835	0.271435	0.897583	0.0831082	0.848068	0.0026617
TRINITY_DN54681_c0_g1	19.52	6	28.3244	7.06396	1.80484	0.00090994	1.43988	0.001321	2.59877	1.74344e-05
TRINITY_DN56017_c1_g1	26.57	3	29.3063	7.85498	0.569513	0.019455	0.751608	0.00705936	0.42805	0.00699603
TRINITY_DN47931_c0_g1	23.63	10	44.0299	8.74854	1.09051	0.0619163	1.18646	0.00867647	1.29385	0.000355071
TRINITY_DN51672_c2_g5	34.81	7	31.2297	6.01123	2.01895	0.000361503	1.50271	0.014266	3.03389	0.000893051
TRINITY_DN47584_c0_g1	28.25	17	70.1079	7.53271	1.13635	0.0080481	0.499863	2.08631e-05	0.568019	7.22246e-06
TRINITY_DN50593_c1_g1	29.77	2	14.3705	8.44092	0.592729	0.0754298	1.15485	0.361858	0.68451	0.146133
TRINITY_DN52155_c1_g1	21.72	19	86.0181	6.25244	1.26166	0.000418181	0.977267	0.276527	1.23298	4.15227e-05
TRINITY_DN49462_c0_g1	31.05	9	38.3037	4.729	1.00202	0.901345	1.12708	0.0624958	1.12936	0.0531365
TRINITY_DN50000_c1_g2	51.72	8	15.4785	8.70459	1.05881	0.280052	0.816836	0.011707	0.86487	0.0797744
TRINITY_DN50361_c1_g2	14.53	10	88.5316	6.75635	1.1044	0.00836052	1.07452	0.0675899	1.18671	0.00477054
TRINITY_DN55211_c1_g1	19.34	1	49.9616	5.97314	0.812339	0.111652	1.20179	0.0997845	0.97626	0.707185
TRINITY_DN51860_c2_g5	30.37	1	14.8281	10.0376	0.833344	0.721541	1.14032	0.575457	0.950282	0.917417
TRINITY_DN55389_c2_g1	49.1	4	18.7356	6.41748	1.13636	0.0937404	1.59749	3.12163e-05	1.81532	0.000192845
TRINITY_DN50171_c3_g2	18.02	12	75.6473	7.48877	1.10181	0.0250768	0.57098	5.02866e-05	0.629114	0.000218744
TRINITY_DN55329_c3_g3	27.48	14	52.401	6.75635	0.991566	0.539117	0.942999	0.00213445	0.935046	0.00434121
TRINITY_DN51375_c3_g3	38.64	18	66.8773	5.2876	1.52823	0.0010133	1.04351	0.487168	1.59472	0.00166992
TRINITY_DN54311_c0_g1	26.36	13	59.48	8.32373	1.53073	0.000103407	1.22313	0.000546411	1.87227	3.94058e-06
TRINITY_DN50027_c2_g2	22.69	8	46.3532	5.94775	0.526486	0.000326969	2.19142	0.00184932	1.15375	0.164408
TRINITY_DN50509_c2_g2	23.79	16	86.9314	6.87354	0.868495	0.0110818	1.08435	0.178043	0.941754	0.18124
TRINITY_DN48262_c0_g1	18.95	10	67.3322	8.93896	1.89365	0.00272206	1.21545	0.0347419	2.30164	9.93372e-06
TRINITY_DN52593_c1_g5	23.99	11	44.2993	8.41162	0.852027	0.0557833	0.758383	0.0104615	0.646163	0.000412359
TRINITY_DN49959_c0_g1	14.18	8	88.3997	6.11279	1.25504	0.0661291	0.993348	0.933087	1.24669	0.0314679
TRINITY_DN52841_c2_g1	26.24	10	48.1168	6.25244	0.660507	0.000775968	0.823885	0.00165336	0.544181	0.000238628
TRINITY_DN54757_c0_g5	48.39	5	14.0312	5.33838	1.66765	0.0016422	3.86069	0.000498092	6.4383	0.000307813
TRINITY_DN55500_c1_g3	24.92	7	36.3626	6.65381	0.99618	0.945964	1.05265	0.297802	1.04863	0.231473
TRINITY_DN48626_c0_g1	17.84	8	57.7027	6.18896	0.745203	0.000639883	1.09149	0.00080477	0.813383	0.00231909
TRINITY_DN50145_c3_g2	15.35	10	96.4694	4.76709	1.09188	0.0549251	1.0131	0.781972	1.10618	0.0389588
TRINITY_DN52673_c1_g1	18.27	12	71.734	5.69385	1.02792	0.803519	1.18253	0.061466	1.21555	0.0753223
TRINITY_DN55231_c1_g3	51.13	6	14.0349	8.70459	0.493395	0.108504	1.02498	0.881396	0.50572	0.123977
TRINITY_DN50077_c0_g3	10.03	19	184.59	6.29053	1.05008	0.217093	0.806307	0.00222541	0.84669	0.016754
TRINITY_DN53190_c0_g2	45.42	7	27.0157	6.87354	0.576154	0.00104691	0.976138	0.658184	0.562406	0.00152059
TRINITY_DN49312_c2_g5	71.52	8	18.1647	6.58057	0.88594	0.0512852	1.1664	0.0272543	1.03336	0.540543
TRINITY_DN54028_c0_g1	46.9	1	12.4022	5.23682	1.08975	0.233429	1.30564	0.0422788	1.42282	0.0121223
TRINITY_DN49774_c1_g1	16.13	2	20.29	10.2573	1.41464	0.000632947	0.841829	0.00566141	1.19089	0.00164009
TRINITY_DN54905_c0_g1	25.83	8	40.0784	6.63916	0.521162	0.000666295	1.3178	0.00194195	0.686786	0.00236405
TRINITY_DN55632_c1_g1	41.77	3	17.6667	5.5415	1.00703	0.937179	0.89116	0.0529804	0.897422	0.253399
TRINITY_DN44476_c0_g1	46.43	10	23.7617	5.22412	1.37199	2.57354e-05	1.49268	0.000325104	2.04793	4.96178e-05
TRINITY_DN53383_c1_g2	50.96	12	29.1403	6.94678	0.895046	0.00781112	0.959048	0.145447	0.858393	0.00216584
TRINITY_DN43994_c0_g1	31.09	11	38.0115	5.13525	1.30674	0.000353778	1.02764	0.165702	1.34286	0.000370794
TRINITY_DN49947_c2_g1	42.95	11	35.33	6.04932	1.3167	0.00232814	1.7122	2.52692e-05	2.25445	7.77041e-07
TRINITY_DN43564_c0_g1	55.46	6	12.8435	5.21143	1.15964	0.0310194	1.08592	0.124834	1.25928	0.00115522
TRINITY_DN50650_c6_g3	14.48	18	154.863	5.19873	1.0843	0.0127555	0.974058	0.485078	1.05618	0.188752
TRINITY_DN51992_c2_g2	21.93	8	47.9536	8.104	0.76344	0.00163153	0.892281	0.174399	0.681203	0.00505072
TRINITY_DN49977_c1_g3	23.44	14	67.6102	6.49365	0.973001	0.681368	1.13071	0.111154	1.10018	0.0463892
TRINITY_DN50116_c1_g7	34.6	6	28.2487	4.71631	1.02521	0.40726	1.0764	0.135693	1.10354	0.0363229
TRINITY_DN51435_c1_g4	38.6	7	24.4348	5.41455	1.13152	0.0038501	0.930767	0.118233	1.05318	0.185376
TRINITY_DN49305_c0_g1	33.16	11	44.2356	5.60498	0.94339	0.182166	0.97776	0.600286	0.922409	0.0679645
TRINITY_DN41077_c0_g1	30.7	14	60.0595	9.01221	0.916698	0.000491382	1.01025	0.514848	0.926099	0.0069851
TRINITY_DN19349_c0_g1	22.6	2	22.3736	6.04932	1.13765	0.059693	1.72023	6.78925e-05	1.95703	0.000131519
TRINITY_DN50542_c2_g3	38.21	11	36.732	7.41553	0.931095	0.143615	0.885731	0.021634	0.824699	0.00638286
TRINITY_DN50104_c0_g3	26.61	2	11.7508	8.86572	1.26835	0.0017391	1.25929	0.000478162	1.59721	9.62993e-05
TRINITY_DN52290_c0_g3	42.8	5	26.8647	6.29053	1.16294	0.0111147	1.3822	0.00462795	1.60742	0.00156963
TRINITY_DN51992_c1_g2	28.21	6	39.6696	4.4751	1.34156	0.00838906	0.840115	0.0299225	1.12706	0.144121
TRINITY_DN53635_c1_g8	37.42	13	35.9841	9.36377	0.956817	0.468244	0.843235	0.0160651	0.806822	0.0276838
TRINITY_DN55075_c1_g1	15.11	12	100.293	5.30029	1.20537	0.00320964	0.95265	0.246986	1.14829	0.00663228
TRINITY_DN51992_c2_g1	22.6	12	64.5258	5.32568	1.10215	0.0298258	0.672744	0.000103231	0.741467	0.00102785
TRINITY_DN52243_c1_g1	36.14	7	21.8764	10.0815	1.06716	0.346705	0.725859	0.000387391	0.774608	0.0184623
TRINITY_DN53560_c6_g1	26.51	14	70.6275	5.73193	1.17716	0.0181299	1.09019	0.0982629	1.28333	0.000757311
TRINITY_DN53442_c2_g5	36.12	12	39.9308	9.31982	0.749836	0.00239362	0.994935	0.852868	0.746038	0.00257235
TRINITY_DN48310_c0_g1	35.18	16	55.4773	7.98682	0.828046	0.00486621	0.988127	0.818361	0.818215	0.0160582
TRINITY_DN47687_c0_g1	13.59	5	39.7131	9.65674	0.131052	3.25343e-05	0.887499	0.517655	0.116308	1.98985e-05
TRINITY_DN54202_c0_g1	27.03	2	24.1086	6.94678	1.00956	0.829303	1.48787	0.000454562	1.50209	0.000503516
TRINITY_DN55322_c1_g1	34.93	6	31.3705	5.0083	0.954999	0.516188	1.09019	0.114388	1.04113	0.495208
TRINITY_DN52902_c1_g1	37.22	12	34.3489	7.35693	1.10649	0.18458	0.908991	0.0798954	1.00579	0.924977
TRINITY_DN52381_c1_g1	20.18	4	22.8473	4.42432	1.25721	0.0235352	1.03679	0.430897	1.30346	0.00614647
TRINITY_DN45003_c0_g1	31.47	11	49.3049	8.36768	1.00485	0.78757	1.1561	0.0220351	1.1617	0.0222589
TRINITY_DN53123_c1_g6	7.95	1	19.1759	8.25049	1.43734	0.0229876	1.64898	0.000688864	2.37015	7.08666e-05
TRINITY_DN47532_c0_g1	32.99	15	53.4941	5.0083	1.19329	0.0189631	0.966484	0.383908	1.15329	0.066144
TRINITY_DN43627_c0_g2	18.91	12	75.4545	5.2749	1.01265	0.733636	0.759922	0.00124919	0.769536	0.00102471
TRINITY_DN52065_c0_g1	13.81	8	82.6896	6.97607	2.45802	0.00137172	0.820321	0.0858077	2.01637	0.000173015
TRINITY_DN46335_c0_g2	28.03	3	16.7864	6.13818	0.693023	0.00365038	0.958244	0.366168	0.664085	0.00142076
TRINITY_DN47825_c0_g2	28.5	10	46.1406	7.13721	1.02578	0.692319	1.56636	0.00079838	1.60675	8.49013e-05
TRINITY_DN49052_c0_g1	31.06	4	15.234	9.1001	0.976482	0.806484	0.952336	0.492224	0.929939	0.368619
TRINITY_DN45638_c0_g1	61.5	11	22.9766	9.37842	0.810259	0.0788782	1.00051	0.995886	0.810668	0.00372651
TRINITY_DN49561_c1_g1	52.53	6	18.1424	6.0874	1.01548	0.860514	2.80565	0.000446572	2.84909	0.000626452
TRINITY_DN55981_c1_g1	16.78	14	95.9939	5.23682	0.958681	0.0793845	0.788057	0.000448176	0.755495	0.000115691
TRINITY_DN42061_c0_g1	20.07	10	65.6563	5.85889	1.51414	7.30558e-05	1.38737	0.000420434	2.10068	2.47125e-05
TRINITY_DN49874_c0_g1	63.25	7	18.3011	5.21143	1.8103	0.00113166	1.75962	0.000578392	3.18543	0.000101664
TRINITY_DN48001_c0_g1	40.31	8	28.8244	6.21436	1.31231	0.000235992	1.20632	0.000318725	1.58307	3.10608e-06
TRINITY_DN55681_c1_g1	21.84	10	75.2589	8.36768	1.07084	0.122206	0.548744	0.000146198	0.587618	2.28345e-05
TRINITY_DN52421_c0_g3	15.13	7	46.6492	6.07471	0.771791	0.0032915	1.13965	0.0182091	0.879571	0.00716974
TRINITY_DN52067_c0_g3	39.93	14	34.0625	7.73779	0.901296	0.187401	1.22585	0.01199	1.10485	0.24013
TRINITY_DN50774_c2_g1	33.22	8	32.0566	6.53662	1.08963	0.0618403	1.20577	0.00352576	1.31385	0.000340579
TRINITY_DN47297_c0_g2	16.07	5	48.8975	7.47412	0.908543	0.48106	1.56736	0.00766056	1.42402	0.0520078
TRINITY_DN42679_c0_g1	33.95	14	42.0074	6.66846	1.09282	0.00986094	0.911944	0.00715935	0.996591	0.882233
TRINITY_DN55096_c1_g5	22.98	14	68.8342	8.42627	1.07034	0.0545321	1.04502	0.0178726	1.11852	0.00900808
TRINITY_DN49299_c1_g1	21.4	5	27.2408	8.104	0.991577	0.900987	1.73173	0.000421351	1.71715	0.000215602
TRINITY_DN49096_c0_g1	29.53	4	20.8879	8.38232	1.04852	0.119797	1.54247	0.00748215	1.61731	0.00557574
TRINITY_DN50874_c2_g4	27.59	5	27.4945	9.29053	1.08231	0.348181	0.988101	0.803718	1.06943	0.324573
TRINITY_DN54208_c0_g2	30.51	5	20.1206	5.85889	1.25645	0.0369833	1.32777	0.0177204	1.66827	0.000648155
TRINITY_DN41034_c0_g1	28.66	14	54.3306	6.07471	1.4258	0.000135269	0.917513	0.00958495	1.30819	0.000809928
TRINITY_DN48346_c0_g1	37.32	6	15.9063	7.41553	0.912284	0.463011	1.79447	0.000203543	1.63706	0.00589883
TRINITY_DN52707_c0_g3	38.42	5	21.8111	6.55127	0.692677	0.000821861	1.28091	0.0414318	0.887259	0.142047
TRINITY_DN43919_c0_g1	16.1	8	58.095	9.39307	0.784654	0.0178235	0.845441	0.014138	0.663379	0.00273143
TRINITY_DN53676_c0_g1	14.38	16	146.966	4.88135	1.28792	0.00590566	0.881823	0.0416767	1.13572	0.122992
TRINITY_DN51916_c1_g1	20	3	12.2817	8.95361	1.14783	0.0182899	0.94925	0.234423	1.08958	0.108428
TRINITY_DN51164_c0_g1	30.25	12	52.4936	6.94678	0.943185	0.131055	1.20853	0.000149379	1.13987	0.00902725
TRINITY_DN55092_c0_g4	21.25	7	39.0744	9.46631	0.941005	0.337099	1.03094	0.490921	0.970122	0.520403
TRINITY_DN48214_c0_g1	24.66	5	30.9522	9.05615	1.07084	0.165093	0.858938	0.0119064	0.919784	0.0374781
TRINITY_DN53805_c1_g1	17.49	20	148.109	7.25439	1.22016	0.00645367	1.06837	0.272517	1.30358	0.00625955
TRINITY_DN50383_c2_g1	33.77	3	17.3937	11.1509	1.60431	0.00642419	0.906085	0.330167	1.45364	0.00726
TRINITY_DN52984_c0_g1	31.51	10	26.5962	8.73389	0.967606	0.216195	0.754885	0.00132075	0.730431	0.000433068
TRINITY_DN52569_c2_g1	28.84	11	52.9989	5.17334	1.22186	0.00854733	0.99276	0.886209	1.21301	0.0406664
TRINITY_DN53419_c2_g1	16.16	18	106.373	6.46826	0.974771	0.676082	0.687132	0.00388569	0.669796	0.000290574
TRINITY_DN54467_c0_g4	37.1	7	14.114	11.2681	1.15193	0.0577806	0.872777	0.0244363	1.00538	0.910646
TRINITY_DN48430_c0_g1	26.22	15	56.5962	8.71924	1.05493	0.156197	1.07344	0.179632	1.13241	0.030527
TRINITY_DN46606_c0_g1	16.25	11	62.077	7.31299	1.31407	0.00321025	1.21903	0.00431514	1.60189	4.87161e-05
TRINITY_DN53395_c2_g1	21.44	10	54.8379	6.84424	1.19487	0.00177291	0.89678	0.0157709	1.07154	0.090094
TRINITY_DN41134_c0_g1	56.58	6	17.4925	10.7261	0.984875	0.909574	0.908671	0.417144	0.894927	0.316262
TRINITY_DN54119_c5_g2	31.61	3	16.3254	8.39697	0.646706	0.00252763	1.41255	0.0075898	0.913503	0.280282
TRINITY_DN54781_c1_g2	13.02	10	104.171	5.31299	1.11651	0.0853148	0.751312	0.00263221	0.838846	0.0261388
TRINITY_DN53596_c1_g4	8.59	15	195.737	6.11279	1.03937	0.486772	0.961131	0.298078	0.998967	0.980958
TRINITY_DN49257_c1_g1	17.36	3	26.1895	5.46533	0.553492	0.00163316	1.27824	0.0251319	0.707496	0.00909768
TRINITY_DN54404_c0_g1	36.03	3	15.0233	10.2134	0.927978	0.0617836	0.896442	0.0242534	0.831878	0.00948412
TRINITY_DN51765_c2_g1	30.35	10	33.8857	9.30518	0.684659	0.000837546	0.999645	0.982968	0.684416	0.000939654
TRINITY_DN54266_c2_g3	15.11	13	91.6315	5.49072	1.03764	0.164542	0.994031	0.791831	1.03145	0.211357
TRINITY_DN49121_c1_g6	12.18	6	68.263	7.26904	1.30328	0.0463311	1.1354	0.16705	1.47975	0.00016733
TRINITY_DN53350_c0_g3	43.58	6	25.6813	9.1001	0.890918	0.0688551	1.31314	0.0132559	1.1699	0.0937419
TRINITY_DN52751_c1_g2	35.11	6	32.255	6.31592	0.472353	0.000474406	0.909859	0.283698	0.429775	0.0002216
TRINITY_DN48399_c0_g1	41.32	9	26.6295	7.25439	1.08141	0.118496	0.928995	0.13548	1.00463	0.83285
TRINITY_DN54959_c0_g1	24.35	11	79.0653	6.62451	1.03668	0.678111	2.75368	0.00108379	2.85468	0.00088581
TRINITY_DN54902_c0_g1	38.46	6	16.0563	7.34229	1.08901	0.258719	1.61235	0.000977218	1.75586	0.000556562
TRINITY_DN52140_c1_g1	38.78	10	16.9194	4.729	1.73511	0.00228813	5.21115	1.70057e-05	9.04191	8.94417e-06
TRINITY_DN54035_c4_g3	26.52	17	60.0701	9.20264	0.893202	0.0205861	0.890005	0.00121289	0.794954	0.00148007
TRINITY_DN55200_c0_g1	13.98	17	142.206	5.32568	1.14369	0.00487817	0.852074	0.00198306	0.974507	0.400662
TRINITY_DN54074_c0_g4	13.26	16	134.757	6.78564	0.889744	0.0131147	0.860938	0.00617449	0.766014	0.000218445
TRINITY_DN52524_c0_g3	22.68	4	34.9662	4.69092	1.04296	0.477852	1.0005	0.992425	1.04348	0.436698
TRINITY_DN53670_c0_g2	18.8	12	68.2153	8.1626	0.991975	0.907204	1.14026	0.0397329	1.13111	0.164455
TRINITY_DN51504_c2_g4	30.26	10	37.9667	5.56689	1.4374	0.0131383	1.34584	0.0258488	1.93452	0.00113523
TRINITY_DN51754_c0_g3	30.97	6	29.0133	6.53662	1.48765	0.0143697	0.884214	0.128995	1.3154	0.0268909
TRINITY_DN55364_c3_g2	40.91	11	30.3684	8.77783	1.69922	0.000420085	0.94447	0.225208	1.60486	0.00079169
TRINITY_DN49107_c0_g3	27.15	18	63.9353	5.40186	1.02446	0.399785	1.09827	0.0106682	1.12514	0.0178593
TRINITY_DN51665_c2_g1	20.09	13	74.1119	7.86963	0.803457	0.0100806	1.34065	0.00073706	1.07715	0.171399
TRINITY_DN49041_c0_g1	20.83	12	58.6345	9.33447	0.913593	0.0892574	0.882955	0.0371078	0.806662	0.0030275
TRINITY_DN54410_c1_g1	14.21	8	107.366	6.27783	1.14604	0.0953664	0.92727	0.1876	1.06269	0.426497
TRINITY_DN51739_c3_g1	35.24	7	24.8339	5.42725	0.682258	0.000320947	0.849436	0.0201308	0.579534	1.74691e-05
TRINITY_DN50477_c0_g2	18.35	8	49.6087	4.90674	1.16341	0.0367275	0.734397	0.000877186	0.854404	0.023486
TRINITY_DN51694_c0_g4	32	22	81.5365	5.75732	1.04474	0.419868	0.991974	0.777127	1.03636	0.49385
TRINITY_DN49992_c0_g2	10.79	15	218.974	8.33838	0.787812	0.00027696	0.818645	0.000636518	0.644938	1.01961e-05
TRINITY_DN47464_c0_g1	23.13	6	29.2113	5.99854	1.00656	0.945697	0.896502	0.277384	0.902386	0.0635777
TRINITY_DN55588_c0_g2	33.74	6	17.9203	7.94287	1.28003	0.0901753	0.983553	0.869466	1.25898	0.0120158
TRINITY_DN41542_c0_g1	58.14	9	19.3501	8.79248	1.0432	0.529429	0.804336	0.000881542	0.839087	0.0734572
TRINITY_DN55249_c0_g1	30.16	10	55.9112	6.60986	0.874946	0.0384698	0.926756	0.0935953	0.810861	0.00581429
TRINITY_DN43913_c0_g1	22.39	16	82.4847	5.18604	1.05999	0.172676	0.926663	0.0623569	0.982253	0.537904
TRINITY_DN52696_c1_g1	15.3	9	67.9868	5.79541	0.888166	0.0243594	0.957697	0.108105	0.850594	0.0149159
TRINITY_DN53431_c0_g2	14.32	18	134.001	8.25049	0.936494	0.172075	0.68259	0.00146149	0.639241	7.55801e-07
TRINITY_DN51222_c1_g2	22.38	8	47.1313	8.22119	1.10564	0.0931725	1.2344	0.00551055	1.3648	0.00503752
TRINITY_DN46468_c0_g1	39.19	6	16.9428	8.27979	1.07298	0.508523	4.06989	0.000249346	4.36691	0.000256858
TRINITY_DN44397_c2_g1	15.4	6	56.5932	7.25439	1.23392	0.00223605	1.13916	0.0145065	1.40562	0.000895083
TRINITY_DN20276_c0_g1	32.88	13	30.5053	10.4185	1.84675	8.89498e-05	0.925995	0.0580116	1.71008	0.000365271
TRINITY_DN53507_c0_g1	20.19	8	44.8357	8.44092	0.571306	0.0159219	2.91022	0.000848322	1.66262	0.0107663
TRINITY_DN51606_c0_g1	22.11	13	56.2129	9.61279	1.19121	0.0293547	1.10023	0.122908	1.3106	0.000355125
TRINITY_DN53984_c1_g2	38.99	6	17.3767	5.40186	1.46727	8.76674e-05	1.24577	0.000464488	1.82787	2.96836e-06
TRINITY_DN50951_c1_g2	24.8	8	27.8848	9.56885	1.03635	0.49807	1.29603	0.000876598	1.34314	0.00204239
TRINITY_DN46984_c0_g1	22.7	4	31.5734	6.55127	0.69559	0.000192353	1.08211	0.0393349	0.752705	0.000744264
TRINITY_DN45430_c0_g1	28.39	9	34.2908	8.32373	1.04179	0.037657	1.22145	0.000645914	1.27249	0.000493081
TRINITY_DN48501_c0_g1	25.45	3	29.9161	9.15869	0.763781	0.00599961	1.10694	0.0567382	0.845458	0.0213362
TRINITY_DN51946_c0_g1	52.54	9	13.3424	10.1255	1.06585	0.162905	0.971878	0.48267	1.03588	0.180058
TRINITY_DN54249_c0_g3	41.67	4	11.9295	10.5942	0.936879	0.167329	1.00562	0.924788	0.942148	0.221163
TRINITY_DN48843_c0_g3	22.03	4	24.5165	8.35303	1.32336	0.0114988	0.829904	0.0393348	1.09826	0.34262
TRINITY_DN51462_c0_g1	24.54	17	73.9514	8.42627	0.885153	0.106419	0.903403	0.142221	0.79965	0.00730237
TRINITY_DN51776_c0_g1	19.29	6	65.4894	5.96045	1.09946	0.0765977	0.969175	0.378424	1.06557	0.082521
TRINITY_DN52622_c3_g1	11.94	15	155.296	6.45557	0.987009	0.749925	1.03906	0.218755	1.02556	0.535336
TRINITY_DN46146_c0_g1	30.36	14	52.1425	6.56592	0.751521	0.000537702	0.871939	0.0255001	0.655281	0.000125487
TRINITY_DN49164_c1_g2	30.41	5	39.2846	7.75244	0.845669	0.045455	1.06166	0.28222	0.897809	0.0388482
TRINITY_DN55663_c2_g1	40.82	9	29.9735	6.1001	0.998319	0.94498	1.04753	0.291977	1.04577	0.363926
TRINITY_DN53805_c0_g2	18.28	2	42.7882	6.72705	1.57675	0.00105669	0.748969	0.00413866	1.18094	0.0318139
TRINITY_DN49538_c2_g4	54.91	7	18.6591	9.40771	1.39075	0.00659683	1.42657	0.00576322	1.98401	0.00114521
TRINITY_DN55160_c2_g6	12.31	11	98.8719	6.04932	1.00059	0.984127	0.965379	0.285454	0.965946	0.203851
TRINITY_DN50527_c1_g6	39.82	8	36.2869	6.99072	0.869723	0.109602	0.969767	0.710411	0.843428	0.0109147
TRINITY_DN49094_c5_g1	49.74	9	21.319	5.73193	0.833645	0.0340678	1.18209	0.0479265	0.985447	0.76173
TRINITY_DN51739_c2_g1	17.95	7	42.5176	7.56201	1.24754	0.0361648	1.30021	0.00441618	1.62206	0.00020371
TRINITY_DN54673_c1_g1	34.52	14	49.1441	7.18115	4.19999	0.000248651	1.50971	0.00346325	6.34077	2.09881e-05
TRINITY_DN52989_c1_g7	15.15	4	28.4162	7.41553	1.11868	0.141565	1.39021	0.00442972	1.5552	0.000801934
TRINITY_DN54974_c0_g1	33.1	8	50.1832	9.42236	0.963226	0.182969	0.919858	0.0803471	0.886031	0.0383085
TRINITY_DN53784_c5_g2	18.41	5	52.3396	7.03467	0.743153	0.0034084	0.93733	0.285257	0.696579	0.0014727
TRINITY_DN46711_c0_g1	30.54	7	26.215	4.70361	1.38585	0.000300613	1.23821	0.000880007	1.71598	1.40148e-05
TRINITY_DN54143_c1_g1	26.15	10	37.552	9.11475	0.933198	0.152316	0.939926	0.167101	0.877137	0.00725887
TRINITY_DN50129_c0_g4	23.01	3	36.8405	5.57959	0.96094	0.420796	0.985994	0.789302	0.947482	0.283458
TRINITY_DN12589_c0_g1	32.36	10	33.4245	7.81104	0.574284	0.000337361	1.05136	0.0309052	0.603777	0.00045513
TRINITY_DN54951_c0_g1	25.42	3	14.0512	10.3892	1.01392	0.925581	0.919127	0.0657706	0.931924	0.648819
TRINITY_DN44498_c0_g1	19.95	25	148.597	6.78564	1.00306	0.688575	0.807799	0.000544846	0.81027	0.00065256
TRINITY_DN47022_c0_g2	25.19	6	45.1614	8.14795	1.15087	0.00786837	0.961694	0.0194224	1.10678	0.0204403
TRINITY_DN48390_c0_g1	36.65	12	34.4511	6.12549	1.11742	0.0565134	1.03352	0.420262	1.15487	0.00126139
TRINITY_DN44419_c0_g1	27.11	9	44.3816	6.68311	0.936868	0.1639	1.32691	0.000299519	1.24314	0.00538246
TRINITY_DN51850_c1_g3	26.39	5	23.6755	5.57959	0.750984	0.00896542	1.10793	0.0883268	0.832041	0.0122048
TRINITY_DN37804_c0_g1	22.91	7	39.1613	8.79248	1.32123	0.00759602	1.09706	0.1854	1.44947	0.00250155
TRINITY_DN49368_c0_g1	43.31	13	29.3928	5.75732	1.00576	0.891001	0.863704	3.28814e-05	0.868675	0.0302524
TRINITY_DN52611_c1_g2	32	12	35.3673	7.82568	1.04349	0.220593	1.03547	0.309528	1.0805	0.00420385
TRINITY_DN52001_c0_g1	34.03	4	36.8766	6.90283	0.491977	0.000200149	0.898342	0.079921	0.441963	8.37698e-05
TRINITY_DN54797_c2_g3	16.58	5	44.3739	6.46826	1.75306	0.00182787	1.25134	0.0106128	2.19367	4.3765e-05
TRINITY_DN56010_c3_g1	19.21	10	81.2497	8.70459	1.40231	0.000551595	0.867762	0.0116744	1.21687	0.000413457
TRINITY_DN47768_c0_g1	39.31	3	16.2663	4.93213	0.98705	0.811375	0.942518	0.373155	0.930313	0.149055
TRINITY_DN50391_c2_g4	65.97	10	15.9042	9.83252	1.20536	0.0619549	0.986505	0.768765	1.18909	0.0741887
TRINITY_DN45120_c0_g1	29.37	4	15.8632	9.5249	1.4209	0.000646541	1.22926	0.00548404	1.74665	0.000276347
TRINITY_DN51190_c2_g2	26.7	12	47.8895	7.89893	0.832364	0.000934929	1.33874	9.39686e-05	1.11432	0.00439072
TRINITY_DN49148_c0_g1	22.49	10	46.0789	5.66846	1.09551	0.356617	1.29478	0.0049628	1.41844	0.005627
TRINITY_DN53075_c0_g4	16.13	20	116.273	7.23975	0.928598	0.0443081	0.977263	0.460047	0.907485	0.00138314
TRINITY_DN49561_c1_g5	37.63	5	22.4579	9.59814	1.57745	0.00294538	4.80794	2.37002e-05	7.5843	1.61457e-05
TRINITY_DN48470_c0_g4	18.58	12	70.7958	9.21729	0.801488	0.000414982	0.778321	0.000374937	0.623815	3.48178e-06
TRINITY_DN49891_c0_g1	29.49	3	24.3972	6.01123	0.680866	0.0143431	0.85928	0.255297	0.585054	0.00059334
TRINITY_DN53981_c2_g7	12.51	7	94.3206	7.06396	0.443063	0.000458915	1.12931	0.105794	0.500355	0.000431084
TRINITY_DN69848_c0_g1	39.68	11	35.0278	6.78564	1.6802	7.94809e-05	1.13608	0.00209637	1.90884	1.85766e-05
TRINITY_DN54029_c0_g1	20	6	29.5143	8.88037	1.03667	0.272012	0.896043	0.0372111	0.928899	0.0262214
TRINITY_DN53289_c0_g1	32.23	2	24.8077	7.06396	0.750679	0.00964473	0.680757	0.007385	0.51103	0.00144292
TRINITY_DN49427_c0_g1	25.19	17	76.713	7.63525	1.12985	0.00247204	0.762609	0.000262449	0.861637	0.00250783
TRINITY_DN42926_c0_g1	41.59	4	23.676	5.74463	0.80923	0.0173405	1.08991	0.19887	0.881985	0.00445133
TRINITY_DN51217_c0_g1	14.68	9	63.4845	7.12256	0.954781	0.552223	1.00294	0.962562	0.957586	0.544533
TRINITY_DN55178_c0_g4	22	9	50.4906	5.08447	0.98601	0.77228	1.0566	0.0719687	1.04182	0.36833
TRINITY_DN48899_c0_g1	47.97	6	13.8311	7.98682	3.52181	1.83195e-06	1.88105	0.0103777	6.62469	0.00116197
TRINITY_DN50964_c0_g1	12.57	9	79.2907	8.92432	1.04553	0.272867	0.807595	0.00113768	0.844363	0.0131966
TRINITY_DN55631_c2_g3	25	7	30.109	6.27783	0.740466	0.0250402	1.06823	0.156277	0.790989	0.0421621
TRINITY_DN51653_c0_g4	10.15	13	143.893	8.98291	0.680491	0.000542863	0.835657	0.00354362	0.568657	8.3442e-05
TRINITY_DN51338_c0_g1	11.77	13	119.326	5.90967	0.945958	0.0871724	0.98646	0.620377	0.93315	0.00323034
TRINITY_DN54491_c0_g1	25.36	22	101.133	6.69775	1.36759	0.000599572	0.721707	0.000298546	0.987002	0.627309
TRINITY_DN53528_c0_g2	18.73	7	37.5557	8.93896	1.19591	0.0792948	1.54073	0.00114067	1.84257	0.000729211
TRINITY_DN45094_c0_g1	33.53	5	18.1106	9.48096	1.65777	0.000543692	1.39763	0.000332781	2.31694	3.71235e-06
TRINITY_DN52544_c3_g2	21.93	8	43.1617	6.23975	0.892017	0.0102116	1.0012	0.937322	0.893092	0.00868444
TRINITY_DN49802_c2_g6	9.2	5	58.2092	4.89404	0.695217	8.50471e-05	0.824246	0.000599021	0.57303	1.38374e-05
TRINITY_DN54956_c0_g1	19.32	8	53.9978	4.67822	0.78772	0.00298102	1.27604	0.00057298	1.00516	0.896228
TRINITY_DN48859_c0_g2	60.71	18	26.0908	11.0776	0.869898	0.0608919	0.352647	2.39947e-05	0.306766	0.000136829
TRINITY_DN45370_c0_g2	48.56	5	22.9824	5.13525	1.40098	0.00670717	1.25385	0.00467625	1.75662	0.00092662
TRINITY_DN53355_c3_g6	38.57	6	24.0383	9.17334	0.832592	0.00738464	1.13322	0.00602247	0.943509	0.185188
TRINITY_DN50420_c1_g4	44.19	2	14.6512	5.8208	0.325719	0.000536404	1.09563	0.508681	0.356867	0.000961641
TRINITY_DN41543_c0_g1	23.16	6	40.8377	8.39697	0.951004	0.0265242	1.19026	0.00371394	1.13194	0.0115911
TRINITY_DN49215_c0_g1	39.94	12	36.6726	7.45947	0.889335	0.0425483	1.28733	0.00330003	1.14487	0.0125631
TRINITY_DN49700_c0_g1	33.07	5	12.9155	9.05615	3.07753	0.00266146	2.08748	0.000459699	6.42428	7.79029e-07
TRINITY_DN50846_c0_g2	17.01	7	54.2691	6.30322	0.817163	0.0109051	0.974911	0.615519	0.796662	0.00856161
TRINITY_DN52290_c0_g1	33.46	5	28.7867	6.1001	1.54646	0.00980548	1.08076	0.431711	1.67136	0.00278607
TRINITY_DN45178_c0_g1	28.03	9	43.765	5.17334	1.16499	0.20317	1.13149	0.126221	1.31817	0.017854
TRINITY_DN47100_c0_g3	43.95	4	18.4022	6.3667	0.871107	0.037248	1.23924	0.0929689	1.07951	0.437716
TRINITY_DN49590_c0_g1	16.44	4	39.4135	7.6499	1.28383	0.00257888	1.04925	0.23521	1.34705	0.000465925
TRINITY_DN51694_c0_g1	14.41	13	115.374	6.03662	1.04513	0.223039	0.891805	0.0075104	0.932049	0.0460349
TRINITY_DN43663_c0_g1	32.31	12	38.6087	7.69385	1.17519	0.00844413	1.3645	6.54075e-05	1.60354	2.98012e-05
TRINITY_DN41124_c0_g1	39.5	10	26.1923	6.87354	0.927375	0.0106909	1.01732	0.394545	0.943434	0.0130122
TRINITY_DN53339_c0_g1	13.76	10	82.5574	7.57666	0.721851	0.000170572	0.910093	0.0125728	0.656951	0.000140679
TRINITY_DN51237_c1_g1	29.15	14	37.1882	5.33838	0.894419	0.026818	0.716425	0.000288339	0.640785	0.000217453
TRINITY_DN52886_c2_g1	28.15	5	14.9976	8.35303	0.512786	3.5286e-05	0.955894	0.31609	0.490169	1.21813e-05
TRINITY_DN55456_c2_g2	47.29	8	28.3085	5.98584	0.752223	0.000613368	1.07925	0.223395	0.811837	0.00883322
TRINITY_DN49663_c0_g5	33.94	4	30.5219	7.44482	1.1771	0.00769543	0.921126	0.0618141	1.08426	0.0368774
TRINITY_DN53020_c3_g3	19.5	8	39.7613	6.91748	1.06981	0.290467	0.951335	0.422553	1.01774	0.409435
TRINITY_DN52907_c0_g1	30.54	4	26.0594	5.38916	1.1331	0.0248639	0.958065	0.224782	1.08558	0.055351
TRINITY_DN51753_c0_g2	20.7	5	25.2525	8.86572	1.56862	0.000461553	1.65997	0.000296187	2.60386	2.52833e-05
TRINITY_DN53205_c2_g2	14.29	10	93.1758	6.30322	0.66117	0.00229148	0.788294	0.00695162	0.521196	0.00101596
TRINITY_DN54371_c0_g2	13.49	19	151.955	6.40479	0.897954	0.00715033	0.984888	0.734921	0.884384	0.0232039
TRINITY_DN47983_c0_g1	28.9	5	33.8177	4.91943	1.49874	0.000235111	1.40485	0.00122865	2.1055	7.99882e-05
TRINITY_DN55176_c0_g1	30.28	14	50.1229	5.77002	0.534262	0.00144896	0.896619	0.00835097	0.479029	0.000883757
TRINITY_DN55456_c1_g1	25.17	4	32.924	8.26514	0.747982	0.00547473	0.99251	0.902457	0.742379	0.000870664
TRINITY_DN53195_c0_g1	18.83	7	51.8631	5.85889	0.927109	0.0160148	0.694455	0.000172709	0.643836	2.00476e-05
TRINITY_DN53357_c1_g1	64.74	8	17.2809	8.35303	1.2695	0.0426892	1.15014	0.073121	1.4601	0.00108737
TRINITY_DN54682_c0_g1	44.22	12	33.7576	7.7085	0.900354	0.168908	1.10132	0.318075	0.991575	0.933472
TRINITY_DN49750_c0_g1	38.19	10	28.4828	5.70654	1.249	0.000587893	1.36547	0.000238968	1.70547	3.98704e-05
TRINITY_DN51731_c0_g1	44.31	8	18.3273	9.37842	1.18782	0.0775191	0.90769	0.0683209	1.07817	0.362911
TRINITY_DN50190_c2_g2	26.58	9	40.2904	4.71631	1.11663	0.205634	0.817182	0.0532291	0.912489	0.0538398
TRINITY_DN48315_c0_g1	22.22	7	77.6103	7.60596	0.637097	0.00112543	1.10481	0.229347	0.703871	0.000245357
TRINITY_DN52253_c2_g2	39.8	1	10.9251	11.5903	1.89178	0.0349441	0.844568	0.297827	1.59773	0.0147073
TRINITY_DN54061_c6_g1	24.2	3	24.2804	6.354	0.620905	0.00455141	0.855811	0.144642	0.531377	0.000512054
TRINITY_DN65038_c0_g1	15.2	8	53.9846	9.18799	0.405478	0.00173606	1.03632	0.664981	0.420206	0.00200967
TRINITY_DN54649_c2_g1	26.42	8	33.7433	7.41553	0.854812	0.0256129	0.970824	0.51731	0.829872	0.00849769
TRINITY_DN53940_c0_g1	12.84	6	52.5973	7.1958	0.363266	0.0102405	1.0418	0.627819	0.378452	0.010552
TRINITY_DN47090_c0_g1	24.11	10	40.718	8.20654	0.424924	0.000219236	1.17894	0.00767334	0.50096	0.0003322
TRINITY_DN50351_c1_g6	26.12	12	54.442	6.41748	1.08887	0.000566255	1.00376	0.873267	1.09297	0.0215816
TRINITY_DN55246_c0_g1	25.21	9	40.9115	8.33838	0.448597	0.0177816	1.1306	0.0722246	0.507186	0.0252104
TRINITY_DN50165_c0_g4	19.65	9	56.8492	6.40479	1.12719	0.0652093	1.13727	0.0146283	1.28192	0.00690872
TRINITY_DN51114_c0_g1	26.28	17	71.6496	7.63525	0.529642	0.000652007	0.799279	0.0113743	0.423332	0.000309189
TRINITY_DN42458_c0_g1	55.7	6	17.2361	9.72998	1.01818	0.824619	1.28741	0.0167981	1.31081	0.00400321
TRINITY_DN46451_c0_g2	52.46	8	13.9783	8.99756	0.825467	0.0565019	1.21307	0.0757924	1.00135	0.985906
TRINITY_DN49094_c2_g1	36.71	5	23.7622	5.24951	1.01083	0.795873	1.31206	0.00321838	1.32628	0.00392178
TRINITY_DN55283_c1_g2	10.72	11	127.095	6.11279	1.02643	0.590509	0.72764	0.00225401	0.746871	0.00450793
TRINITY_DN55614_c3_g2	19.79	9	86.4585	8.08936	0.899916	0.0537394	1.1154	0.0378552	1.00377	0.842106
TRINITY_DN48985_c0_g1	44.51	4	20.1531	7.92822	0.883491	0.063328	1.26368	0.00388068	1.11645	0.0102879
TRINITY_DN49927_c0_g1	22.29	8	49.0694	5.93506	1.43526	0.000733568	0.89684	0.020152	1.2872	0.00571852
TRINITY_DN52772_c7_g4	35.47	14	59.6661	6.50732	0.935546	0.280846	0.917105	0.183886	0.857994	0.0162059
TRINITY_DN49670_c1_g2	18.8	3	38.3465	10.7407	1.29281	0.0308793	0.755669	0.0291022	0.976939	0.629816
TRINITY_DN53348_c0_g1	20.6	9	44.4195	6.68311	1.0317	0.552768	1.10259	0.0927263	1.13754	0.0161348
TRINITY_DN52452_c1_g1	36.76	8	22.6921	8.23584	0.978548	0.425392	0.868164	0.0315242	0.849541	0.0155329
TRINITY_DN50405_c2_g2	23.59	12	60.7954	9.02686	1.14679	0.221947	1.02793	0.742837	1.17883	0.0177367
TRINITY_DN51718_c0_g2	43.85	5	13.7272	9.61279	1.98033	1.06283e-05	1.6558	0.00065467	3.27903	6.42802e-05
TRINITY_DN54231_c1_g3	26.65	10	50.31	6.52197	1.08863	0.0561566	0.835547	0.00454919	0.909602	0.0190468
TRINITY_DN52366_c0_g1	24.06	6	34.5758	5.2876	1.13827	0.0176856	1.153	0.00354956	1.31243	0.00033258
TRINITY_DN37536_c0_g1	19.71	14	85.7072	5.63037	0.821309	0.0326109	0.974134	0.645522	0.800065	0.00503237
TRINITY_DN55505_c1_g2	26.94	8	29.2007	4.90674	1.11366	0.112369	1.22376	0.0181894	1.36285	0.0059159
TRINITY_DN54394_c1_g1	15.89	12	85.1856	5.74463	0.353778	1.21386e-05	0.855789	0.115102	0.302759	3.58612e-07
TRINITY_DN55396_c0_g1	12.81	15	132.513	5.88428	1.63955	0.000151038	0.855595	0.0062344	1.40279	3.08453e-05
TRINITY_DN54035_c4_g2	20.36	9	60.9241	8.08936	1.08158	0.0629429	0.871407	0.00879217	0.942493	0.120989
TRINITY_DN47402_c0_g1	26.59	11	65.1123	4.77979	1.08654	0.161761	0.901801	0.0575498	0.979843	0.636544
TRINITY_DN50214_c0_g4	37.77	10	39.4755	9.30518	1.27792	0.0120074	0.69433	5.51136e-05	0.887299	0.167675
TRINITY_DN51522_c1_g4	9.66	4	63.9667	7.66455	0.80596	0.00147854	0.861653	0.000674314	0.694458	0.00018382
TRINITY_DN48110_c0_g1	42.54	5	15.536	9.72998	1.23051	0.100576	0.784096	0.0784195	0.964836	0.628065
TRINITY_DN50486_c2_g1	38.48	11	42.726	9.64209	1.18851	0.0222356	1.02106	0.657546	1.21355	0.00191448
TRINITY_DN52448_c0_g2	26.76	3	31.5763	6.17627	0.831803	0.0482037	1.95024	1.358e-05	1.62222	0.000415968
TRINITY_DN50030_c0_g1	16.75	8	64.8534	6.84424	1.16063	0.00702476	1.20674	0.00849262	1.40058	0.00179268
TRINITY_DN48255_c0_g1	30.43	3	30.18	8.79248	1.52798	0.000584836	1.47898	0.000822002	2.25985	0.00013121
TRINITY_DN48753_c0_g1	44.85	5	18.7555	7.18115	1.1178	0.0981776	1.51016	0.000685695	1.68805	0.000537228
TRINITY_DN51142_c0_g1	18.44	12	65.3895	5.8208	1.54229	0.000284032	1.31778	0.000566437	2.0324	5.69015e-05
TRINITY_DN55941_c3_g1	33.45	10	31.9861	9.45166	1.45135	3.69649e-05	1.26437	7.30834e-05	1.83504	8.68268e-07
TRINITY_DN49621_c0_g2	22.33	10	55.5945	4.71631	1.05494	0.538194	1.33412	0.00729056	1.40742	0.000660529
TRINITY_DN52098_c0_g1	22.76	2	15.4489	4.66553	1.06104	0.0854561	1.03692	0.395448	1.10022	0.0439036
TRINITY_DN51408_c1_g3	30.22	9	45.3771	8.06006	0.914461	0.119902	0.859622	0.0283223	0.786091	0.00335665
TRINITY_DN51253_c0_g4	12.4	13	161.917	4.71631	1.25227	0.00625429	0.886899	0.0140912	1.11064	0.0942128
TRINITY_DN49424_c0_g4	35.26	4	17.7893	6.32861	0.571045	0.000817159	1.13119	0.103831	0.645961	0.000562655
TRINITY_DN54423_c0_g1	17.99	13	99.2092	6.15088	0.921809	0.178253	0.81267	0.0281999	0.749126	0.00295007
TRINITY_DN54707_c3_g1	29.08	12	49.0238	9.1001	0.644758	0.000477321	0.980755	0.676027	0.63235	6.85895e-05
TRINITY_DN50572_c1_g1	39.25	12	44.2891	7.03467	1.18518	0.0135939	0.963742	0.420195	1.14221	0.00981582
TRINITY_DN56015_c1_g1	10.34	17	174.312	4.66553	1.06012	0.348802	1.12846	0.00974531	1.1963	0.0262839
TRINITY_DN48868_c0_g1	28.45	7	37.3842	9.27588	1.25757	0.00132329	1.45711	0.000387384	1.83242	0.00011269
TRINITY_DN48343_c0_g1	34.93	7	29.0846	6.22705	0.47456	6.11521e-05	1.31254	0.0255981	0.62288	0.000677254
TRINITY_DN55955_c0_g2	14.35	9	78.063	7.26904	1.08748	0.136448	0.850036	0.0182135	0.924396	0.0269521
TRINITY_DN45550_c0_g1	52.76	8	13.7744	10.2573	0.994835	0.893793	3.0553	0.000940808	3.03952	0.000924905
TRINITY_DN52002_c0_g4	34.78	9	47.616	7.26904	0.994031	0.90382	0.682591	0.00260066	0.678517	0.00133809
TRINITY_DN53415_c1_g3	25.94	6	30.0699	5.50342	1.3629	0.00163904	1.98157	4.03294e-05	2.70069	1.60845e-05
TRINITY_DN48924_c1_g1	22.35	11	58.5695	5.09717	0.934123	0.170949	0.775334	0.00344433	0.724257	0.00196646
TRINITY_DN51081_c2_g5	28.03	2	14.6284	5.21143	0.781607	0.0378418	1.44121	0.0079074	1.12646	0.191814
TRINITY_DN51757_c0_g2	22.54	11	55.3351	7.44482	0.665862	0.000306766	0.833963	0.0118243	0.555304	5.03126e-05
TRINITY_DN47515_c0_g1	23.22	10	47.1789	5.96045	1.22956	0.070178	1.62033	0.00112637	1.99228	3.73996e-06
TRINITY_DN52755_c3_g1	33.93	7	25.1448	4.729	0.674319	0.239729	1.20355	0.400278	0.811576	0.494501
TRINITY_DN48657_c1_g2	23.12	12	56.2311	5.13525	0.898838	0.170298	0.959008	0.0417422	0.861993	0.0873719
TRINITY_DN52585_c1_g1	14.71	2	18.0428	4.44971	1.22556	0.32136	1.25698	0.13393	1.54051	0.015955
TRINITY_DN52108_c2_g1	17.03	14	95.2506	6.11279	0.576162	0.000212287	1.27754	0.00215286	0.736069	0.00161679
TRINITY_DN48517_c0_g1	32.58	1	25.3208	6.63916	0.974709	0.533867	1.19848	0.0204653	1.16817	0.025446
TRINITY_DN49297_c0_g1	31.64	8	38.2746	6.80029	1.2634	0.0181156	1.30415	0.0512696	1.64766	0.0134657
TRINITY_DN54607_c0_g2	44.92	2	13.8129	6.56592	1.73497	0.0158614	1.03043	0.810695	1.78777	0.00574126
TRINITY_DN52386_c0_g5	23.04	21	96.5121	6.22705	1.59492	6.5741e-06	1.12549	0.00621996	1.79506	1.81755e-05
TRINITY_DN53123_c1_g2	16.91	4	33.269	7.35693	1.07751	0.213581	0.69413	0.000243313	0.747929	0.00785811
TRINITY_DN47626_c0_g1	13.08	19	141.425	6.27783	1.01864	0.223197	0.892214	0.000846399	0.908848	0.00460096
TRINITY_DN51214_c1_g1	12.34	8	79.3553	5.45264	1.30449	0.014637	0.826219	0.00519213	1.07779	0.287471
TRINITY_DN20751_c0_g1	34.36	8	24.48	7.54736	1.06139	0.464456	1.28098	0.00128788	1.35962	0.00929628
TRINITY_DN55997_c10_g1	32.95	2	19.5569	5.40186	1.08899	0.0237444	0.964784	0.384285	1.05064	0.209537
TRINITY_DN49461_c0_g1	19.49	6	38.2754	6.55127	1.78263	0.000130764	0.862028	0.0431045	1.53668	0.00511173
TRINITY_DN53210_c1_g2	20.72	14	74.5385	6.18896	0.908066	0.00150612	0.807912	0.00221502	0.733637	0.000430656
TRINITY_DN52897_c3_g1	23.09	14	61.164	8.646	1.0121	0.811944	1.12663	0.0388769	1.14026	0.0219159
TRINITY_DN49926_c1_g3	24.35	6	41.7759	5.35107	0.926228	0.192877	0.862477	0.00931974	0.798851	0.00967967
TRINITY_DN53093_c0_g2	40	10	24.3685	9.08545	0.960829	0.248074	1.195	0.00336184	1.14819	0.0070107
TRINITY_DN48635_c0_g1	37.46	11	37.5329	5.90967	0.931933	0.00234848	0.836603	0.000283543	0.779658	3.84408e-05
TRINITY_DN50996_c0_g1	11.35	5	50.7049	6.55127	0.299839	9.99358e-05	1.08781	0.348799	0.326168	6.11507e-05
TRINITY_DN53763_c1_g4	44.93	4	15.5369	7.86963	0.983849	0.764022	0.910866	0.0833858	0.896155	0.0702337
TRINITY_DN52012_c3_g1	38.43	8	30.7969	7.44482	0.890779	0.00435452	0.729665	0.000330689	0.649971	0.000233084
TRINITY_DN42995_c0_g1	16.7	7	53.0995	7.03467	1.05561	0.316511	0.917094	0.203791	0.968097	0.617595
TRINITY_DN52121_c3_g1	28.94	11	47.5484	5.35107	1.31806	0.000606524	0.883011	0.0233352	1.16386	0.00943592
TRINITY_DN54235_c0_g3	16.24	9	51.1178	6.45557	0.76213	0.0137314	0.859477	0.0939559	0.655032	0.000466174
TRINITY_DN49064_c0_g1	12.76	7	69.0207	6.29053	1.03152	0.54354	1.04254	0.33683	1.0754	0.191791
TRINITY_DN52667_c4_g2	14.25	5	48.2775	4.42432	1.16664	0.113344	0.9358	0.320244	1.09175	0.322813
TRINITY_DN50325_c0_g1	9.38	4	61.1797	7.26904	1.25158	0.0249783	0.985665	0.815299	1.23364	1.25099e-05
TRINITY_DN53180_c0_g1	18.45	12	70.5508	7.43018	0.920219	0.0366028	0.944492	0.0843794	0.869139	0.00638691
TRINITY_DN16944_c0_g1	13.51	5	49.113	6.97607	1.4932	0.00162457	0.885463	0.0278238	1.32218	0.00372993
TRINITY_DN50147_c1_g1	29.05	9	36.8819	9.29053	1.07957	0.433858	1.04396	0.292521	1.12702	0.253731
TRINITY_DN54019_c0_g1	31.03	15	59.5	6.7417	1.10801	0.0680348	0.833701	0.000825869	0.923749	0.181519
TRINITY_DN53588_c0_g3	20.78	3	25.9686	8.27979	1.29757	0.0122733	3.52342	1.78737e-05	4.5719	1.41906e-05
TRINITY_DN51057_c2_g1	27.91	8	32.8665	8.63135	1.74219	0.00101982	1.29179	0.00138436	2.25055	5.5021e-05
TRINITY_DN52337_c0_g1	32.42	8	28.4348	6.44287	1.10756	0.210853	0.739817	0.00462513	0.819391	0.0391929
TRINITY_DN51347_c2_g8	19.58	7	58.6858	5.04639	1.00003	0.999509	1.1132	0.288265	1.11323	0.323391
TRINITY_DN47216_c0_g1	35.02	6	25.1962	9.23193	0.710064	0.00237452	1.00382	0.941435	0.712774	0.00619489
TRINITY_DN45700_c1_g2	22.81	4	26.6768	9.64209	1.96457	0.00684439	2.41506	0.00356861	4.74456	0.00107502
TRINITY_DN50035_c0_g1	26.67	7	34.2605	9.1001	0.933908	0.0494096	0.97583	0.366289	0.911335	0.0519272
TRINITY_DN54627_c8_g2	17.35	4	53.3433	6.41748	1.44023	0.0257432	0.870677	0.117721	1.25397	0.0469155
TRINITY_DN52001_c0_g2	34.43	7	40.0956	8.00146	0.831053	0.00172425	0.948549	0.0685549	0.788295	0.000852423
TRINITY_DN44562_c0_g2	41.18	9	20.7675	9.67139	1.70409	0.00130026	1.19021	0.0157196	2.02821	8.49457e-05
TRINITY_DN53014_c1_g2	28.07	2	12.387	8.80713	1.3399	0.0340975	0.711819	0.00376756	0.953765	0.640452
TRINITY_DN50089_c3_g1	22.19	7	42.1851	7.06396	0.786149	0.138793	1.30622	0.0223152	1.02688	0.848963
TRINITY_DN55051_c1_g4	30.87	7	33.6634	6.53662	1.4201	0.0131498	1.58691	0.00202853	2.25357	0.000530301
TRINITY_DN42241_c0_g1	37.72	11	25.946	9.49561	0.580717	0.00105913	1.03081	0.69798	0.598608	0.00356817
TRINITY_DN53723_c0_g1	21.92	7	36.0282	7.57666	0.833017	0.00123409	1.40275	2.64485e-05	1.16851	0.000734802
TRINITY_DN54378_c1_g2	15.58	5	41.6204	5.56689	1.02416	0.703738	1.11481	0.157659	1.14174	0.0310008
TRINITY_DN61275_c0_g1	23.77	7	36.1826	6.69775	1.29266	0.023627	1.16636	0.0339947	1.5077	0.0018326
TRINITY_DN52563_c4_g2	48.19	9	20.9025	4.88135	1.20265	0.030727	0.820589	0.0237369	0.986884	0.805193
TRINITY_DN42383_c0_g1	28.03	8	37.1152	9.45166	1.15092	0.278303	0.946794	0.628775	1.08968	0.110521
TRINITY_DN48315_c0_g3	19.67	5	96.0078	6.46826	1.66219	0.00285792	1.17236	0.0894408	1.94869	0.00329949
TRINITY_DN51180_c0_g2	35.78	7	26.9924	4.81787	0.884742	0.0238069	1.13094	0.087724	1.00059	0.990189
TRINITY_DN56017_c1_g4	21.5	2	21.4412	7.85498	0.350393	0.0063807	0.946276	0.588201	0.331569	0.00535381
TRINITY_DN52448_c0_g4	30.16	4	34.2206	6.45557	0.900224	0.405393	1.17148	0.0231844	1.05459	0.618096
TRINITY_DN55735_c1_g2	28.5	4	23.1879	6.81494	1.00557	0.934204	0.955166	0.577331	0.960486	0.420361
TRINITY_DN50145_c3_g1	10.96	8	96.9119	4.70361	0.775086	0.000816174	1.17234	0.0220173	0.90866	0.0343409
TRINITY_DN40779_c0_g1	37.67	8	25.185	5.87158	1.14822	0.307592	1.1714	0.163584	1.34503	0.0127257
TRINITY_DN46743_c0_g1	27.46	3	16.2823	10.3452	0.799527	0.000950837	0.946543	0.175942	0.756787	0.000864486
TRINITY_DN11222_c0_g1	33.64	11	37.105	8.99756	0.716617	0.00404132	1.00928	0.719767	0.723264	0.00446498
TRINITY_DN51794_c0_g1	45.28	4	12.4167	10.4771	1.2101	0.0861206	1.02074	0.792345	1.2352	0.0041948
TRINITY_DN51541_c0_g2	29.34	14	57.3086	7.72314	1.22597	0.0017276	0.93458	0.0149115	1.14576	0.0108842
TRINITY_DN53738_c0_g1	14.8	13	97.9556	6.17627	0.877337	0.00533721	0.913422	0.00277402	0.801379	0.000610812
TRINITY_DN49209_c0_g1	32.03	4	15.2735	6.354	0.513598	0.0079445	0.739845	0.0197866	0.379983	0.0030294
TRINITY_DN51596_c0_g1	13.88	8	81.207	7.63525	1.57562	0.000228802	0.860823	0.0120126	1.35633	0.00137531
TRINITY_DN55550_c1_g3	31.19	7	35.2669	6.40479	1.87765	0.00374489	5.28635	5.45883e-06	9.92591	2.97007e-06
TRINITY_DN48675_c2_g1	37.98	12	37.3312	7.6499	0.984105	0.848112	1.10295	0.189749	1.08542	0.204525
TRINITY_DN47956_c0_g1	11.22	11	98.918	7.26904	1.28988	0.00102825	0.977606	0.370159	1.26099	0.00229765
TRINITY_DN50478_c1_g2	30.98	2	20.9642	8.03076	1.02551	0.442187	1.06534	0.355541	1.09252	0.253882
TRINITY_DN53410_c0_g2	32.11	10	42.508	8.25049	1.18316	0.000545233	0.901962	0.0201314	1.06717	0.0742518
TRINITY_DN54865_c0_g1	20.95	11	54.2555	6.78564	0.893984	0.0857965	0.820497	0.00351468	0.733511	0.00255318
TRINITY_DN54486_c0_g1	57.43	6	11.971	4.79248	1.18083	0.13139	0.803295	0.00279294	0.948552	0.617564
TRINITY_DN52924_c2_g2	26.44	11	44.1856	8.1333	1.1409	0.0570626	1.52735	0.000502434	1.74255	0.00033647
TRINITY_DN50748_c0_g1	26.89	9	43.6755	7.06396	0.966485	0.304236	0.797076	0.000503299	0.770362	0.000666325
TRINITY_DN50660_c4_g2	39	7	26.8109	7.29834	1.21884	0.0360417	0.800282	0.0222475	0.975418	0.54764
TRINITY_DN54911_c2_g3	19.84	14	80.5594	7.23975	0.903487	0.110069	1.13924	0.01874	1.02928	0.569802
TRINITY_DN53179_c2_g1	24.85	8	38.6852	6.55127	1.12932	0.246527	0.845447	0.104071	0.954782	0.550068
TRINITY_DN47373_c0_g1	42.56	8	26.972	4.37354	0.515213	0.00227422	1.10611	0.323765	0.569881	0.00111123
TRINITY_DN50231_c0_g2	11.79	11	122.463	5.98584	1.15294	0.0208242	1.01864	0.673659	1.17443	0.00261384
TRINITY_DN53097_c1_g2	13.23	7	70.3008	5.51611	1.13543	0.142028	0.900305	0.229864	1.02224	0.622459
TRINITY_DN43772_c0_g1	23.68	10	47.5558	4.80518	0.965005	0.150485	1.218	0.000493283	1.17537	0.00140341
TRINITY_DN38705_c0_g1	22.47	7	29.3972	9.39307	1.10884	0.152687	1.03752	0.504191	1.15044	0.0277573
TRINITY_DN58274_c0_g1	53.04	5	12.8198	5.31299	1.07147	0.312003	0.927446	0.114693	0.99373	0.91177
TRINITY_DN47075_c1_g3	30.51	7	35.3705	5.66846	0.79719	0.0211929	1.27448	0.015486	1.016	0.701484
TRINITY_DN55269_c2_g1	17.08	8	71.0959	8.44092	1.42459	0.00472163	0.984498	0.697227	1.40251	0.00202636
TRINITY_DN50596_c0_g1	35.59	6	19.7243	4.55127	1.27568	0.0365633	1.69952	0.00134992	2.16805	0.000507014
TRINITY_DN47161_c0_g1	42.68	7	16.6694	8.88037	0.907058	0.248539	0.882066	0.119576	0.800085	0.020388
TRINITY_DN46946_c0_g1	26.16	14	60.0064	5.2749	0.758346	0.00515073	1.06294	0.283389	0.806076	0.0256997
TRINITY_DN55625_c3_g2	23.8	10	46.3	7.10791	1.10423	0.0142933	0.666322	7.64013e-05	0.735775	5.70209e-05
TRINITY_DN49218_c2_g2	20.31	14	73.5341	8.74854	0.976969	0.530199	0.961208	0.246181	0.93907	0.124714
TRINITY_DN48811_c0_g1	15.88	11	67.3715	8.32373	0.74386	0.0020428	1.1052	0.00564108	0.822112	0.00759465
TRINITY_DN48374_c0_g1	54.05	6	16.3476	9.48096	1.05405	0.26244	0.928023	0.0524734	0.978184	0.66752
TRINITY_DN48773_c0_g2	41.89	7	15.9182	7.04932	0.698295	0.031801	1.59369	0.000987962	1.11287	0.310802
TRINITY_DN45534_c0_g1	23.08	8	39.3402	6.354	0.855113	0.102377	1.01519	0.812938	0.868099	0.11259
TRINITY_DN50478_c1_g1	29.67	2	20.9332	7.63525	1.26267	0.155606	1.1772	0.212243	1.48641	0.000851932
TRINITY_DN50592_c0_g2	17.19	5	32.5539	5.46533	0.324154	0.000655213	0.699483	0.059413	0.22674	0.000203835
TRINITY_DN41029_c0_g1	30.98	11	39.9698	5.13525	1.23755	0.00352893	0.9319	0.00714074	1.15327	0.01269
TRINITY_DN48697_c1_g1	15.69	2	22.8635	5.65576	1.13204	0.029392	1.2006	0.00506116	1.35912	5.11333e-06
TRINITY_DN55887_c3_g1	18.39	10	73.4157	6.53662	0.988242	0.748033	1.00855	0.705801	0.996694	0.934826
TRINITY_DN54930_c0_g2	23.98	8	56.0857	5.92236	0.859544	0.0121078	0.844144	0.0071477	0.725579	0.00183931
TRINITY_DN48931_c0_g1	9.49	2	31.7945	8.1333	1.1764	0.0634716	1.26959	0.0100286	1.49354	0.00102146
TRINITY_DN53150_c0_g3	38.33	7	27.0092	6.01123	1.21076	0.0339344	1.08387	0.207415	1.31231	0.000370323
TRINITY_DN53481_c1_g2	8.82	10	124.532	5.93506	0.959186	0.213507	1.02571	0.405415	0.983849	0.421878
TRINITY_DN49888_c4_g8	26.1	9	33.2411	7.6499	1.01371	0.736386	1.47064	0.000149346	1.49081	0.000282751
TRINITY_DN50466_c0_g1	13.51	2	16.7736	8.85107	1.28603	0.00937209	1.05547	0.172832	1.35738	0.0023035
TRINITY_DN49596_c2_g1	50.38	6	15.5385	10.5503	1.0998	0.176806	0.964753	0.4246	1.06103	0.298753
TRINITY_DN53738_c1_g5	20.74	11	72.4558	6.01123	1.18285	0.00123732	0.754226	0.000416525	0.892139	0.00569381
TRINITY_DN54699_c0_g1	21.18	6	32.6492	5.07178	1.06081	0.03531	0.915843	0.0274565	0.971535	0.343384
TRINITY_DN50001_c6_g1	34.35	10	38.0608	6.68311	0.907195	0.067769	1.27086	0.00876735	1.15292	0.0228339
TRINITY_DN55481_c0_g2	6.26	13	235.008	5.66846	1.06008	0.47824	0.944098	0.442841	1.00082	0.987639
TRINITY_DN38072_c0_g2	16.4	15	89.9553	5.43994	1.11327	0.104323	0.909959	0.0881597	1.01303	0.696559
TRINITY_DN51053_c2_g2	18.91	10	57.5448	6.20166	1.15576	0.0121831	0.882881	0.0250308	1.0204	0.398775
TRINITY_DN47234_c0_g1	7.02	16	227.269	5.26221	0.65973	0.000227672	1.0021	0.933145	0.661115	0.000114425
TRINITY_DN50246_c0_g2	19.72	8	30.8595	5.24951	1.37735	0.00321474	0.795613	0.00680183	1.09583	0.0400974
TRINITY_DN56038_c4_g2	38.3	18	49.7193	5.13525	1.18295	0.0245806	0.943328	0.235605	1.1159	0.124017
TRINITY_DN43588_c0_g1	17.06	11	75.8904	4.76709	0.841385	0.0113423	0.946945	0.371715	0.796746	0.00173317
TRINITY_DN55057_c2_g1	18.37	5	37.4865	5.03369	1.9173	0.00105044	0.750221	0.0109077	1.4384	0.0115727
TRINITY_DN48589_c0_g3	19.48	9	54.6307	8.6167	1.22608	0.126975	0.928487	0.467907	1.1384	0.0601617
TRINITY_DN49020_c0_g3	19.49	14	83.7442	9.34912	1.09648	0.0883739	0.861587	0.0142548	0.944712	0.230527
TRINITY_DN53141_c1_g4	26.01	3	23.9279	6.31592	1.23925	0.121769	0.847692	0.048848	1.0505	0.712872
TRINITY_DN50112_c1_g3	43.41	6	20.3275	5.38916	0.938448	0.376846	1.01699	0.766918	0.95439	0.484381
TRINITY_DN51663_c1_g1	20.45	7	34.1388	6.43018	0.936894	0.110945	1.00156	0.966039	0.938352	0.0115913
TRINITY_DN55012_c1_g5	16.98	9	68.8435	9.5542	1.2438	0.0299765	0.84221	0.00400419	1.04754	0.552555
TRINITY_DN54453_c0_g1	24.11	5	36.569	4.86865	1.07021	0.422654	0.987408	0.849961	1.05673	0.369889
TRINITY_DN55913_c1_g1	63.64	10	23.8515	4.79248	0.244435	0.00154482	1.25367	0.0162697	0.306442	0.00207926
TRINITY_DN53357_c2_g2	58.44	8	17.0118	6.96143	1.08911	0.475703	1.22305	0.0668807	1.33204	0.00792218
TRINITY_DN51285_c1_g3	5.93	10	205.071	6.07471	1.01768	0.409579	0.929662	0.0217397	0.9461	0.00653856
TRINITY_DN46803_c0_g2	13.55	15	118.979	5.24951	1.26307	0.00368441	0.902723	0.0110803	1.1402	0.0228346
TRINITY_DN49147_c1_g1	13.55	5	52.0966	7.94287	0.958625	0.692592	1.13518	0.180207	1.08821	0.273808
TRINITY_DN54763_c0_g1	21.11	13	92.5324	5.80811	0.908656	0.0435381	1.41663	8.45739e-05	1.28723	0.00156636
TRINITY_DN49911_c1_g2	20.27	5	49.5763	6.58057	1.24409	0.00898543	0.919579	0.0453016	1.14404	0.07278
TRINITY_DN52677_c0_g2	23.23	10	54.7909	5.30029	0.94191	0.0417867	0.866311	0.0156755	0.815987	0.00675926
TRINITY_DN46234_c0_g3	22.03	7	38.2071	5.63037	0.971667	0.366538	0.886119	0.01014	0.861013	0.0103619
TRINITY_DN50086_c0_g1	15.74	13	99.2788	5.77002	1.09528	0.0776025	0.979073	0.548797	1.07235	0.0379913
TRINITY_DN52988_c2_g5	44.12	4	11.8008	4.98291	0.801208	0.1145	0.976631	0.788627	0.782485	0.138846
TRINITY_DN21175_c0_g1	29.44	6	24.7456	5.65576	1.38186	0.0151792	0.99992	0.999129	1.38175	0.00129826
TRINITY_DN48201_c0_g4	18.86	9	75.3743	6.7417	0.611842	0.00118942	1.24044	0.0119053	0.758956	0.0096885
TRINITY_DN43774_c0_g1	14.11	4	36.6327	5.8335	1.23214	0.0148109	3.38263	8.99717e-05	4.16787	6.45832e-05
TRINITY_DN54620_c0_g3	25.16	17	89.4617	6.41748	0.612366	7.93855e-05	0.768769	0.000137084	0.470768	2.97582e-05
TRINITY_DN49680_c0_g1	26.17	13	60.1949	7.72314	0.849765	0.0524472	1.22626	0.00499006	1.04203	0.433933
TRINITY_DN49724_c1_g7	16.62	5	38.9677	5.09717	0.926999	0.447705	1.81958	0.00274127	1.68675	0.00597689
TRINITY_DN46318_c0_g1	27.86	9	35.36	7.78174	1.26587	0.00180116	1.11863	0.0459085	1.41604	0.00170692
TRINITY_DN50236_c2_g3	43.48	7	20.8294	5.98584	1.27111	0.0310065	1.24509	0.0210079	1.58265	0.000296635
TRINITY_DN50339_c0_g1	9.87	2	42.3371	9.75928	1.28854	0.180068	1.50344	0.021987	1.93724	0.000504019
TRINITY_DN49464_c0_g1	30.19	9	22.4675	6.34131	1.01772	0.848347	1.07382	0.428544	1.09284	0.0254178
TRINITY_DN50536_c2_g7	24.84	6	34.5171	9.53955	1.00501	0.878851	1.20043	0.0273073	1.20645	0.0197278
TRINITY_DN52281_c0_g2	13.74	7	67.0662	5.50342	1.1039	0.339186	1.20186	0.0460509	1.32673	0.0181218
TRINITY_DN47725_c0_g1	15.35	8	48.5708	6.32861	1.32357	0.00167713	0.812185	0.000404941	1.07498	0.185987
TRINITY_DN44941_c0_g2	46.95	5	23.4417	6.68311	1.13843	0.0502227	1.03637	0.306644	1.17984	0.0126328
TRINITY_DN49236_c2_g3	20.04	10	51.1559	5.5415	0.92724	0.125263	0.980596	0.646726	0.909248	0.00562379
TRINITY_DN45130_c0_g1	12.34	3	39.3335	9.26123	0.8686	0.0438472	0.912059	0.183548	0.792214	0.0173519
TRINITY_DN51920_c0_g1	18.89	3	34.9607	5.10986	0.402028	0.000214153	0.797493	0.0466317	0.320615	0.000111209
TRINITY_DN44436_c0_g1	16.3	10	70.495	8.30908	1.22823	9.21676e-05	1.19714	0.0041621	1.47036	0.000295908
TRINITY_DN54240_c0_g2	14.97	13	96.7433	4.89404	0.976661	0.641711	0.904294	0.119012	0.883189	0.00235233
TRINITY_DN55321_c2_g7	34.66	10	36.5495	6.34131	1.01803	0.475246	0.95144	0.279586	0.968598	0.393745
TRINITY_DN45907_c0_g1	15.56	4	44.4187	7.29834	1.02702	0.723019	1.01556	0.7706	1.043	0.486107
TRINITY_DN47022_c0_g1	30.48	9	46.6103	7.1958	1.33327	0.0363298	1.15286	0.15313	1.53707	0.00045211
TRINITY_DN45544_c0_g1	20.69	6	38.6923	8.11865	1.05072	0.477913	0.968507	0.59337	1.01763	0.655739
TRINITY_DN43370_c0_g1	38.16	6	23.899	4.29736	3.10046	8.29333e-05	1.76175	0.00230561	5.46223	0.000168812
TRINITY_DN50809_c0_g1	12.14	7	65.402	4.84326	1.57973	0.00120662	1.34567	0.0016158	2.1258	8.37931e-05
TRINITY_DN48098_c0_g1	31.9	11	36.4175	8.5874	1.14712	0.0770397	1.10879	0.0697395	1.27191	0.00176708
TRINITY_DN52597_c0_g2	19.48	4	30.3714	4.83057	0.895847	0.0450276	1.13584	0.137363	1.01754	0.767529
TRINITY_DN53752_c2_g5	28.78	5	22.8418	8.95361	0.984635	0.853581	1.07038	0.0876941	1.05394	0.551464
TRINITY_DN52450_c2_g1	36.28	3	23.9682	6.3667	1.12096	0.100921	1.07414	0.2109	1.20407	0.0232217
TRINITY_DN55615_c0_g1	15.59	5	57.2495	5.87158	0.887299	0.00392447	0.8074	0.004263	0.716405	0.000966171
TRINITY_DN54190_c3_g1	12.2	8	64.4221	6.37939	0.98601	0.235323	0.934928	0.00530149	0.921849	0.00192227
TRINITY_DN45508_c0_g1	24.31	7	36.3984	5.70654	0.818403	0.00695612	1.06899	0.433812	0.874868	0.154537
TRINITY_DN50888_c3_g1	25.69	6	28.3273	4.61475	0.873321	0.0144354	0.831528	0.00467726	0.726191	0.00107599
TRINITY_DN51949_c0_g1	17.1	18	123.071	7.92822	0.865314	0.0318664	0.69384	0.000604071	0.600389	0.000742145
TRINITY_DN53205_c2_g1	16.03	10	68.4248	7.15186	1.22916	0.000513453	0.920997	0.00077709	1.13206	0.00344229
TRINITY_DN46137_c0_g1	38.1	14	43.1474	8.646	1.4582	0.000336251	1.06552	0.0186034	1.55374	0.000154684
TRINITY_DN52583_c2_g1	13.24	13	127.195	5.92236	0.716998	0.00478503	1.05274	0.460298	0.754812	0.000309972
TRINITY_DN52265_c0_g1	19.78	9	40.4277	5.51611	1.02763	0.30222	1.17577	0.00382885	1.20825	0.00177535
TRINITY_DN45539_c0_g1	14.4	15	113.313	6.01123	1.12891	0.00655755	0.835853	5.5511e-05	0.9436	0.0759528
TRINITY_DN48322_c0_g1	31.82	4	24.3124	9.23193	1.08622	0.272489	2.62393	6.80325e-05	2.85015	5.02332e-05
TRINITY_DN53184_c6_g4	16.75	8	65.8689	6.13818	1.21734	0.00101745	1.00393	0.88017	1.22213	0.0009226
TRINITY_DN55267_c3_g3	13.79	2	26.3616	5.33838	0.985626	0.856199	0.968966	0.791593	0.955039	0.635797
TRINITY_DN52879_c2_g1	28.6	11	55.0815	9.30518	1.11116	0.000181392	0.82207	0.00171681	0.913454	0.0319458
TRINITY_DN49946_c0_g1	19.31	23	113.679	8.08936	1.08599	0.0835524	0.860594	0.00710903	0.934596	0.1562
TRINITY_DN52353_c0_g2	25.79	10	36.772	7.10791	1.2224	0.0206188	1.253	0.0282868	1.53167	0.00167326
TRINITY_DN52996_c1_g1	26.65	8	46.0915	5.8335	0.767209	0.0168254	0.994551	0.914166	0.763028	0.0145725
TRINITY_DN10374_c0_g1	6.31	6	122.811	8.96826	0.936178	0.0512243	0.966231	0.368233	0.904564	0.022267
TRINITY_DN54197_c3_g1	8.71	8	117.531	5.94775	1.05498	0.499964	1.06265	0.45976	1.12108	0.113792
TRINITY_DN44581_c0_g1	41.67	9	31.3829	5.78271	1.26978	0.0278381	1.129	0.0705953	1.43358	0.0078262
TRINITY_DN53036_c0_g1	6.27	10	181.851	7.09326	1.12871	0.0534405	0.919981	0.0836673	1.03839	0.417442
TRINITY_DN48412_c0_g1	13.54	5	39.638	11.063	1.29587	0.0366221	0.909801	0.284402	1.17898	0.0252509
TRINITY_DN54646_c0_g2	17.84	7	50.7545	5.85889	1.04916	0.466044	0.842513	0.056763	0.883929	0.00124252
TRINITY_DN54981_c0_g1	37.92	7	26.1895	6.69775	1.21386	0.0355821	2.05902	0.000998763	2.49936	0.000567817
TRINITY_DN51477_c0_g2	35.71	4	15.5094	7.1665	1.18195	0.0201516	0.760581	0.0055328	0.898973	0.0343469
TRINITY_DN48106_c0_g2	12.52	5	53.3402	7.63525	1.06801	0.523021	1.21792	0.0399193	1.30074	0.00795747
TRINITY_DN45404_c0_g1	43.43	11	28.9976	8.47021	1.05655	0.202885	1.12334	0.0489822	1.18686	0.00544611
TRINITY_DN53150_c0_g6	11.91	11	120.787	6.771	1.11822	0.0815688	1.07333	0.263839	1.20022	0.0223007
TRINITY_DN46861_c0_g2	20.82	3	42.3147	5.51611	1.00925	0.839855	1.00743	0.797182	1.01674	0.646858
TRINITY_DN55540_c1_g1	25.68	8	28.9325	6.55127	0.91735	0.216174	0.964643	0.465291	0.884915	0.132353
TRINITY_DN52459_c1_g1	13.16	14	108.992	6.12549	1.0361	0.242269	0.853764	0.002874	0.884582	0.00128244
TRINITY_DN52504_c2_g1	23.05	9	35.6767	9.67139	0.726849	0.00438084	0.918863	0.210229	0.667875	0.000973854
TRINITY_DN48736_c0_g2	16.6	12	80.8829	6.13818	0.891952	0.0466638	1.1775	0.0121483	1.05027	0.210409
TRINITY_DN37685_c0_g1	26.07	6	23.9533	6.78564	1.30127	0.0086249	1.17973	0.0372357	1.53514	0.00279633
TRINITY_DN49934_c5_g1	19.81	14	98.0005	7.29834	0.609253	0.00109862	0.956372	0.151465	0.582673	0.00071133
TRINITY_DN53769_c0_g1	12.05	13	122.932	5.73193	0.723347	0.00109696	0.907857	0.0482703	0.656695	0.000123094
TRINITY_DN48158_c0_g2	26.62	1	16.6083	5.14795	1.5533	0.119047	1.63353	0.0268706	2.53737	0.000562258
TRINITY_DN52748_c1_g1	22.25	10	54.5482	8.11865	1.23749	0.00862437	0.877326	0.0382578	1.08568	0.0127304
TRINITY_DN50470_c0_g2	27.25	8	43.0879	9.01221	1.4508	0.00724869	1.42121	0.00858494	2.06189	0.0013553
TRINITY_DN48968_c0_g1	14.02	7	72.5029	5.8208	1.32285	0.00162792	1.20677	0.0022207	1.59637	1.81432e-05
TRINITY_DN53297_c1_g4	15.43	4	36.1786	9.21729	0.539968	0.103125	1.39081	0.10644	0.750995	0.319369
TRINITY_DN53194_c3_g2	12.17	13	123.228	6.7417	1.26292	0.00996363	1.03539	0.572627	1.30762	0.0131754
TRINITY_DN51003_c2_g1	24.17	4	26.647	9.39307	0.821797	0.0231423	0.765794	0.00669904	0.629327	0.00280276
TRINITY_DN53432_c0_g1	16.43	8	54.8299	8.38232	0.817405	0.00199568	0.939939	0.156621	0.76831	0.00162411
TRINITY_DN51751_c2_g4	13.07	9	79.7567	6.23975	0.925453	0.134683	0.945536	0.282246	0.875049	0.0180412
TRINITY_DN37416_c0_g1	22.98	8	41.8306	6.53662	0.875939	0.00567287	1.10413	0.00949791	0.967146	0.231516
TRINITY_DN49071_c0_g1	25.33	7	31.6242	7.31299	1.23466	0.00370113	1.18435	0.0034352	1.46227	5.14305e-05
TRINITY_DN52730_c1_g1	27.68	2	12.2782	7.12256	1.31697	0.0410465	0.915402	0.423187	1.20556	0.0634718
TRINITY_DN50925_c0_g3	41.26	6	22.8706	6.18896	0.852901	0.0626874	0.840193	0.0795132	0.716601	4.06722e-05
TRINITY_DN51524_c0_g1	31.06	4	17.6759	9.05615	0.260427	0.006228	0.917277	0.399878	0.238884	0.00535816
TRINITY_DN41119_c0_g1	18.47	9	53.4901	5.70654	1.44442	0.000928949	1.24648	0.00321095	1.80045	7.59679e-05
TRINITY_DN55039_c0_g3	24.03	14	63.4708	5.46533	1.04512	0.171644	0.972566	0.347255	1.01645	0.123743
TRINITY_DN53275_c3_g3	7.22	9	153.256	5.38916	1.07599	0.152606	0.85732	0.0299229	0.922468	0.0188974
TRINITY_DN48053_c0_g1	23.7	12	59.1555	5.33838	0.787323	0.0377282	0.955159	0.452298	0.752018	0.0108889
TRINITY_DN55748_c1_g3	49.14	4	13.2601	8.36768	1.0187	0.83263	4.24342	9.4141e-05	4.32277	0.000109392
TRINITY_DN47393_c0_g1	36.13	4	17.3348	5.78271	1.51686	0.0271686	1.78636	0.00210631	2.70965	0.000185003
TRINITY_DN53102_c1_g2	24.81	1	15.0577	8.07471	0.774748	0.00926026	0.903272	0.195987	0.699808	0.00180984
TRINITY_DN47404_c0_g1	15.2	12	88.1884	6.30322	1.089	0.0593056	0.97511	0.246354	1.06189	0.106479
TRINITY_DN55664_c0_g1	14.18	4	61.3071	7.63525	1.14629	0.00982075	0.782433	0.0016465	0.896898	0.0123791
TRINITY_DN50499_c2_g2	24.89	5	25.2139	8.71924	0.772389	0.000264065	0.961743	0.159136	0.74284	0.000102957
TRINITY_DN48199_c0_g1	26.29	2	23.3596	7.00537	0.936235	0.0391101	1.1893	0.060024	1.11347	0.161718
TRINITY_DN54087_c1_g2	36.57	4	20.1562	9.70068	1.08634	0.16893	0.894666	0.0653563	0.971913	0.397067
TRINITY_DN49773_c0_g2	4.74	23	496.524	5.92236	1.18395	0.00109696	1.54612	0.000426433	1.83053	0.000131518
TRINITY_DN70202_c0_g1	16.98	1	16.7442	8.6167	1.65468	0.0926453	1.41213	0.0732082	2.33662	0.000970076
TRINITY_DN52453_c1_g2	41.67	6	13.0047	6.65381	1.15103	0.0128758	1.00738	0.932619	1.15953	0.158693
TRINITY_DN55663_c4_g1	30.84	5	24.6057	6.52197	1.27297	0.0115277	1.60613	0.000214363	2.04455	2.33348e-05
TRINITY_DN46105_c0_g1	14.6	13	116.757	7.6792	1.16273	0.00463809	0.846405	0.00265933	0.984142	0.337222
TRINITY_DN54115_c0_g1	34.09	5	19.8102	6.21436	0.468976	0.00520635	0.389413	0.00405585	0.182625	0.000617501
TRINITY_DN54276_c0_g1	29.74	11	51.7397	8.39697	0.953405	0.158796	1.02506	0.368742	0.977301	0.40578
TRINITY_DN49214_c1_g1	12.48	7	63.7849	6.85889	1.41207	0.0195169	2.84196	0.00644647	4.01306	0.00381285
TRINITY_DN46352_c0_g1	22.78	9	36.6276	6.06201	1.15157	0.0339217	1.26933	0.00482637	1.46173	0.000518872
TRINITY_DN53659_c1_g2	26.29	11	54.8099	5.89697	0.934845	0.486788	2.5302	0.00153271	2.36534	0.00235298
TRINITY_DN53216_c0_g1	11.3	13	127.705	9.0415	1.15092	0.0186507	0.854619	0.00126248	0.983599	0.659608
TRINITY_DN50194_c0_g2	11.59	11	119.546	6.04932	0.887925	0.0370056	1.09468	0.000355767	0.971993	0.489112
TRINITY_DN45632_c0_g2	22.34	5	32.8241	6.90283	1.252	0.0100472	0.82716	0.0150345	1.03561	0.335267
TRINITY_DN54974_c0_g2	38.94	8	38.0004	8.17725	0.918359	0.0909383	0.805778	0.00414044	0.739994	0.000965311
TRINITY_DN51363_c0_g2	15.36	5	63.1251	6.7417	1.3334	0.000801401	1.09729	0.00970524	1.46313	0.000368836
TRINITY_DN51854_c0_g3	22.07	5	24.4871	6.21436	0.763362	0.00887954	0.963606	0.427456	0.73558	0.00644587
TRINITY_DN51673_c1_g1	14.29	4	53.2957	8.77783	1.2099	0.0385459	1.3476	0.008577	1.63046	0.000411477
TRINITY_DN49903_c2_g1	7.29	13	188.23	6.48096	0.760424	0.0077197	0.945101	0.405601	0.718678	0.000663334
TRINITY_DN50469_c0_g3	9.11	4	48.7267	5.49072	0.950027	0.147773	1.23814	0.0852105	1.17626	0.142794
TRINITY_DN49222_c6_g4	48.08	6	17.1861	6.80029	1.51255	0.00373358	1.54799	0.00100771	2.34142	9.51359e-05
TRINITY_DN46963_c0_g1	19.27	5	35.6364	7.28369	1.12717	0.0356716	0.897712	0.0413265	1.01187	0.774553
TRINITY_DN51544_c0_g1	15.03	1	39.2066	5.03369	0.967043	0.821905	1.2736	0.20505	1.23163	0.197303
TRINITY_DN53814_c2_g3	24.53	9	52.9824	6.84424	0.831566	0.0789297	0.687559	0.00473485	0.571751	0.00462563
TRINITY_DN53481_c0_g2	11.72	11	104.13	5.75732	0.853266	0.168519	0.802279	0.0598714	0.684557	0.00714888
TRINITY_DN54684_c1_g4	15.72	9	92.5432	5.59229	4.12999	0.000171627	0.791391	0.0382813	3.26844	0.00022321
TRINITY_DN52635_c5_g3	25.17	6	31.5057	6.31592	0.974348	0.40708	1.35705	0.000863267	1.32224	0.00221883
TRINITY_DN55120_c2_g2	42.94	5	18.4278	5.42725	1.13773	0.124966	0.682177	0.00345171	0.776131	0.00546067
TRINITY_DN52621_c0_g3	15.68	6	51.7986	5.60498	0.847314	0.0297007	1.00192	0.954829	0.848944	0.0465337
TRINITY_DN50058_c2_g6	18.43	7	53.7844	9.68604	1.03207	0.435691	1.17039	0.0035784	1.20793	0.00131215
TRINITY_DN49971_c1_g1	29.13	2	12.3687	9.59814	0.987224	0.827066	1.17039	0.208251	1.15544	0.274095
TRINITY_DN48254_c3_g1	21.21	5	36.5991	5.38916	1.11551	0.0131431	1.02637	0.495006	1.14492	0.00723052
TRINITY_DN43288_c0_g1	19.88	7	37.5819	5.75732	0.949343	0.269415	1.48671	0.000418009	1.4114	0.0018488
TRINITY_DN48413_c1_g1	14.33	13	107.868	6.21436	1.07847	0.248506	0.737013	0.00594031	0.794845	0.00355533
TRINITY_DN53570_c0_g2	17.26	5	36.5831	9.17334	0.822461	0.0518871	0.694071	0.0112646	0.570846	0.000216435
TRINITY_DN45577_c0_g1	22.59	13	70.067	6.02393	1.04944	0.521266	1.08294	0.179762	1.13648	0.0811657
TRINITY_DN55687_c0_g1	45.54	1	13.1477	8.44092	1.04932	0.549048	1.01231	0.852772	1.06224	0.400901
TRINITY_DN47468_c0_g1	15.84	7	56.7827	9.34912	1.1257	0.124343	0.909514	0.104692	1.02384	0.621698
TRINITY_DN79781_c0_g1	26.03	8	46.9677	7.76709	0.784439	0.0378553	1.06662	0.136899	0.8367	0.0871042
TRINITY_DN52626_c1_g1	47.41	5	15.1649	9.26123	0.873234	0.0689625	0.857914	0.00525582	0.74916	0.00590585
TRINITY_DN54591_c1_g2	26.19	2	22.8762	9.26123	0.538786	0.000199774	2.28997	0.00015491	1.2338	0.0115392
TRINITY_DN40544_c0_g2	30.77	12	48.2385	5.5542	0.93995	0.0613667	0.627667	5.75237e-05	0.589975	3.45994e-05
TRINITY_DN37492_c0_g1	1.84	1	59.3829	7.15186	1.0053	0.940848	0.962822	0.62388	0.967928	0.22367
TRINITY_DN49168_c0_g2	9.77	1	14.7306	6.26514	0.927275	0.141384	0.966031	0.603546	0.895776	0.09007
TRINITY_DN51069_c1_g6	28.14	5	26.6605	8.03076	0.866803	0.175417	1.08339	0.25815	0.939083	0.456228
TRINITY_DN54471_c0_g1	7.5	13	156.884	6.26514	1.02406	0.393149	0.965169	0.190805	0.988392	0.705375
TRINITY_DN52688_c0_g2	41.98	3	14.5997	7.18115	0.394062	0.0002244	0.682714	0.0195924	0.269032	4.53266e-05
TRINITY_DN51489_c0_g1	13.73	10	92.7644	5.73193	0.954162	0.296143	0.990063	0.745549	0.94468	0.207599
TRINITY_DN54212_c1_g2	5.25	14	277.24	7.00537	1.08371	0.121595	1.06628	0.223685	1.15553	0.0142847
TRINITY_DN50998_c2_g4	13.66	10	84.3552	5.03369	0.861698	0.0971595	0.92654	0.405669	0.798397	0.00381638
TRINITY_DN8026_c0_g1	24.79	7	13.4192	9.74463	1.17356	0.0847438	0.994938	0.937366	1.16762	0.0501621
TRINITY_DN53129_c2_g1	18.21	12	66.4743	5.38916	1.28474	0.00719195	0.856363	0.0272311	1.1002	0.0183611
TRINITY_DN49942_c0_g1	37.06	9	34.3859	6.354	1.55713	0.00261448	0.923326	0.158164	1.43774	0.00554983
TRINITY_DN46833_c0_g1	16.79	13	73.2403	6.7124	1.30368	0.00027957	0.935466	0.0246673	1.21955	0.000554466
TRINITY_DN55996_c1_g3	22.03	7	55.7983	5.43994	0.957704	0.446481	0.960604	0.411127	0.919974	0.0579481
TRINITY_DN51699_c0_g1	17.65	12	76.9859	6.99072	2.3035	0.000504638	1.70049	0.000727297	3.91709	1.82353e-05
TRINITY_DN55037_c2_g1	17.4	10	68.4221	9.14404	1.05901	0.382051	0.913014	0.16348	0.966893	0.471299
TRINITY_DN43984_c0_g1	7.81	1	22.2902	10.1987	0.967632	0.323505	0.976837	0.564487	0.945219	0.16166
TRINITY_DN50790_c1_g5	20.03	11	69.361	6.99072	0.843577	0.0484194	1.00479	0.873818	0.847616	0.0550312
TRINITY_DN53268_c1_g1	8.92	3	42.599	8.36768	0.744851	0.0518818	1.04689	0.698988	0.779778	0.0627967
TRINITY_DN55560_c0_g1	31.28	7	42.5445	7.51807	1.27877	0.183325	1.57943	0.0097533	2.01973	0.000380029
TRINITY_DN45115_c0_g1	46.06	8	19.4529	5.89697	1.02313	0.72821	3.04183	0.0232652	3.11218	0.0221272
TRINITY_DN45267_c0_g1	9.69	5	51.3304	5.38916	1.58753	0.0268119	1.41081	0.0345301	2.2397	0.00206379
TRINITY_DN45664_c0_g1	21.58	12	62.2182	6.87354	0.963781	0.279675	1.0197	0.697038	0.98277	0.663336
TRINITY_DN55723_c1_g3	16.14	8	52.0692	5.31299	1.11796	0.141785	1.4005	0.0034815	1.5657	0.000183767
TRINITY_DN52651_c1_g1	13.26	11	93.6969	5.31299	1.1149	0.0895829	0.938481	0.0477393	1.04631	0.36571
TRINITY_DN46928_c0_g3	38.75	12	35.0422	5.80811	0.799324	0.0178657	1.38304	0.00849097	1.10549	0.222874
TRINITY_DN55923_c4_g3	37.04	7	21.4112	4.79248	1.52679	0.00134584	1.98366	0.00464414	3.02864	0.00147348
TRINITY_DN54900_c0_g1	19.11	7	34.6779	9.29053	1.26616	0.00149912	1.00252	0.918166	1.26935	0.000122992
TRINITY_DN48636_c0_g4	29.78	10	40.0666	6.93213	0.892185	0.0011731	0.950228	0.0244878	0.847779	0.0006437
TRINITY_DN49277_c1_g1	11.94	8	85.9283	9.21729	0.446066	0.00019123	0.477582	0.00064883	0.213033	2.26268e-05
TRINITY_DN49024_c1_g3	24.53	8	46.9489	7.1958	0.961195	0.324113	0.884819	0.0209939	0.850483	0.0230115
TRINITY_DN53044_c1_g2	19.46	10	87.7732	6.18896	1.07787	0.18458	1.02548	0.509922	1.10534	0.0536719
TRINITY_DN51906_c0_g2	23.53	10	54.55	8.32373	0.912951	0.309175	3.22491	0.000841514	2.94418	0.000835131
TRINITY_DN47810_c0_g1	11.08	8	74.3078	6.34131	0.973664	0.374559	0.868317	0.000606405	0.845449	0.00286222
TRINITY_DN50524_c0_g3	28.85	12	46.399	9.20264	1.25209	0.000488009	1.03789	0.25655	1.29953	0.000365945
TRINITY_DN43340_c0_g1	18.87	8	45.284	6.46826	0.886847	0.00233138	0.801437	0.000465211	0.710753	0.000147306
TRINITY_DN53566_c2_g1	24.37	4	22.527	5.60498	1.16408	0.00179759	1.3999	6.33948e-05	1.62961	1.38588e-05
TRINITY_DN48783_c0_g2	17.84	5	44.0719	4.43701	3.75856	3.6251e-05	1.32339	0.0055727	4.97403	3.7228e-05
TRINITY_DN55678_c0_g2	35.04	1	12.3894	4.84326	1.37363	0.121953	1.45049	0.0234158	1.99244	0.000402378
TRINITY_DN44198_c0_g1	11.65	12	103.196	7.44482	1.04868	0.190405	0.889287	0.0119929	0.932577	0.0217503
TRINITY_DN43039_c0_g1	15.02	4	32.0602	8.76318	1.2311	0.0303539	1.5413	0.00196986	1.89749	0.000297689
TRINITY_DN51078_c0_g1	18.98	12	66.0968	4.99561	1.16262	0.014555	1.38966	0.000119276	1.61565	7.35761e-05
TRINITY_DN47319_c0_g1	16.88	17	108.069	4.67822	0.766156	0.000242609	0.887137	0.0462377	0.679685	0.000391167
TRINITY_DN53044_c1_g1	17.2	11	92.1469	6.15088	0.902067	0.0464815	1.07723	0.023786	0.971736	0.510019
TRINITY_DN52217_c0_g2	14.11	8	58.0626	6.53662	1.10417	0.0432965	0.869882	0.0251779	0.960501	0.294644
TRINITY_DN51914_c1_g3	13.45	6	89.1699	6.32861	1.02591	0.364613	0.843981	0.0056093	0.86585	0.00661889
TRINITY_DN52958_c7_g2	33.33	6	26.0016	6.52197	1.61973	0.00957881	1.21566	0.0584382	1.96904	9.8048e-05
TRINITY_DN51525_c2_g1	26.63	2	21.657	8.63135	0.643683	0.0122622	0.845057	0.140187	0.543948	0.00185593
TRINITY_DN46891_c0_g1	16.59	7	50.5081	9.74463	0.378879	0.000490055	0.851927	0.113068	0.322778	0.000222479
TRINITY_DN52385_c2_g3	29.11	6	23.9532	8.73389	2.91784	1.87935e-05	2.32828	0.000125786	6.79355	2.34029e-05
TRINITY_DN54315_c3_g4	17.11	7	58.596	5.84619	0.976114	0.762297	0.792496	0.0518025	0.773566	0.00276671
TRINITY_DN47431_c0_g1	24.66	7	50.0442	6.62451	0.598457	7.30318e-05	0.891418	0.00590914	0.533476	2.25627e-05
TRINITY_DN56075_c2_g3	15.28	5	42.8466	9.39307	1.23827	0.0570597	1.18696	0.016539	1.46979	0.00372651
TRINITY_DN45864_c0_g1	15.35	8	70.4542	6.3667	1.20562	0.0169989	0.817051	0.00327003	0.98505	0.731287
TRINITY_DN45724_c0_g1	20.86	5	17.8074	8.52881	1.5844	0.00106358	1.42952	0.000688973	2.26493	2.45067e-06
TRINITY_DN55921_c2_g1	17.93	6	80.4778	7.31299	1.03531	0.319229	1.01281	0.762965	1.04857	0.273258
TRINITY_DN55999_c1_g1	12.93	13	97.6337	5.41455	0.863323	0.00388734	1.26079	0.116215	1.08847	0.482904
TRINITY_DN45027_c0_g1	18.97	4	39.8074	7.21045	0.88008	0.150217	1.04987	0.608345	0.923974	0.370681
TRINITY_DN51578_c6_g1	18.08	2	38.2057	5.73193	1.69733	0.0109519	0.902712	0.354029	1.5322	0.00448458
TRINITY_DN46664_c0_g1	17.99	13	86.5916	5.97314	1.19284	0.00244449	1.07178	0.0363515	1.27846	0.00106601
TRINITY_DN49183_c1_g1	22.94	2	12.3456	8.60205	0.843499	0.0772161	3.38652	3.3171e-05	2.85653	1.7696e-05
TRINITY_DN45034_c0_g1	16.34	4	22.5919	9.61279	0.884501	0.538613	0.785	0.00885215	0.694333	0.158221
TRINITY_DN40319_c0_g1	26.58	5	25.1352	9.01221	1.82714	3.14862e-05	1.31006	0.000100444	2.39367	8.87233e-07
TRINITY_DN48877_c0_g1	26.03	10	34.3328	5.24951	0.991309	0.818578	1.01204	0.738366	1.00325	0.859985
TRINITY_DN49925_c0_g2	5.73	5	93.7094	6.60986	1.03424	0.782455	0.832349	0.217446	0.860847	0.0467385
TRINITY_DN50203_c1_g6	20.29	15	77.2818	6.34131	0.883604	0.0743718	0.798563	0.0125936	0.705613	0.000318136
TRINITY_DN52219_c1_g1	8.47	8	135.875	7.6792	0.477139	0.000103816	0.958886	0.343975	0.457522	9.7852e-05
TRINITY_DN48721_c0_g2	17.19	8	55.3464	6.65381	1.32103	0.00230378	0.873478	0.0146652	1.15389	0.0119968
TRINITY_DN49520_c3_g1	11.41	6	57.7925	3.90381	1.01075	0.772977	0.744801	5.38958e-05	0.752808	0.00214846
TRINITY_DN54153_c0_g2	8	5	85.7665	8.85107	0.537411	0.00198418	0.837929	0.0228437	0.450312	0.000871551
TRINITY_DN52090_c0_g1	25.38	11	52.0213	6.85889	1.23963	0.00761196	1.04737	0.0176409	1.29835	0.00308615
TRINITY_DN49392_c0_g2	13.95	7	54.812	6.7124	1.07696	0.156613	0.633071	0.000961694	0.681792	0.00444365
TRINITY_DN44316_c0_g1	12.32	14	115.495	8.03076	0.894059	0.0709231	0.78368	0.00521561	0.700656	0.000328955
TRINITY_DN54793_c1_g1	22.36	8	36.9149	9.59814	0.824674	0.0552264	0.944191	0.416598	0.77865	0.00941965
TRINITY_DN42288_c0_g1	47.69	11	28.0263	7.34229	0.991908	0.880067	0.93262	0.157144	0.925073	0.12515
TRINITY_DN41520_c0_g1	21.47	7	40.7114	8.86572	0.888468	0.0463615	0.942788	0.0427633	0.837637	0.0172383
TRINITY_DN53832_c0_g1	21.3	3	43.5281	6.53662	0.645705	0.00111844	1.06129	0.24683	0.685278	0.00226674
TRINITY_DN43548_c0_g1	22.77	8	36.5964	6.91748	0.785701	0.00222982	0.772918	0.00190511	0.607282	4.17377e-05
TRINITY_DN45298_c0_g1	69.87	13	24.9382	10.4038	1.05596	0.287065	0.513166	0.000398496	0.541881	0.00185357
TRINITY_DN52227_c2_g2	30.41	11	44.3952	8.33838	1.13422	0.0908697	0.981372	0.387495	1.11309	0.118571
TRINITY_DN54092_c1_g1	14.46	6	45.1372	5.89697	0.534767	0.0173487	0.913659	0.325801	0.488594	0.0133469
TRINITY_DN55200_c0_g3	12.41	8	63.3959	9.17334	0.821527	0.0840517	0.615184	0.0130726	0.505391	0.000115049
TRINITY_DN54984_c2_g6	17.51	10	58.323	6.16357	1.03317	0.444345	0.898778	0.0731451	0.928592	0.0359164
TRINITY_DN54184_c2_g5	22.65	3	19.9882	6.78564	0.98284	0.890386	1.17288	0.207715	1.15275	0.0248038
TRINITY_DN52545_c1_g2	8.33	13	147.005	6.75635	1.08308	0.136447	1.08069	0.0315348	1.17048	0.0139093
TRINITY_DN54828_c1_g1	17.45	11	62.3355	5.26221	0.911362	0.0785431	1.19027	0.0198563	1.08476	0.0944509
TRINITY_DN50091_c0_g1	19.35	8	59.5315	6.11279	0.731123	0.00839653	0.922704	0.17559	0.67461	0.00173083
TRINITY_DN49811_c0_g2	25.76	6	33.2971	9.0708	0.776791	0.0317185	1.84009	0.000605811	1.42937	0.00459702
TRINITY_DN54013_c0_g1	18.48	8	55.2449	6.27783	2.33416	2.72213e-06	1.56568	0.00170109	3.65454	0.000108134
TRINITY_DN45793_c0_g1	37.67	8	24.9504	4.86865	0.904762	0.317305	1.52095	0.0192725	1.37609	0.0373995
TRINITY_DN53295_c2_g1	23.71	4	21.421	8.76318	1.79076	0.000342951	1.10462	0.146479	1.97812	0.000483092
TRINITY_DN50186_c0_g3	22.06	12	70.1812	8.17725	0.881194	0.162938	0.855067	0.00250669	0.753479	0.0228654
TRINITY_DN55395_c1_g1	20.15	8	59.6823	8.54346	0.923201	0.0719084	1.18664	0.0160786	1.0955	0.102396
TRINITY_DN54414_c1_g9	16.9	6	38.9268	4.89404	0.974468	0.678777	0.920852	0.233225	0.897341	0.0259387
TRINITY_DN52449_c3_g1	20.64	5	46.4018	8.48486	1.17969	0.0772005	0.758617	0.0507243	0.894935	0.361009
TRINITY_DN55689_c2_g1	18.06	11	73.5074	6.87354	0.979467	0.766463	0.862298	0.0144895	0.844592	0.0796402
TRINITY_DN52033_c1_g7	20.22	1	19.6739	7.26904	0.782461	0.0134955	1.14176	0.406545	0.89338	0.425835
TRINITY_DN45125_c0_g1	31.01	9	31.5906	5.40186	0.843674	0.00101414	1.14603	0.00215276	0.966874	0.105758
TRINITY_DN54120_c1_g1	11.63	3	40.6111	9.30518	1.72288	0.000217079	1.08232	0.06287	1.8647	9.09232e-07
TRINITY_DN55153_c0_g5	15.61	8	86.2488	6.85889	1.00229	0.966778	1.03216	0.300861	1.03453	0.566399
TRINITY_DN48353_c1_g4	16.85	2	41.828	6.1001	0.846354	0.126327	0.944578	0.50111	0.799447	0.0172683
TRINITY_DN47491_c0_g1	21.24	5	28.9412	6.72705	1.39929	0.00081764	0.918376	0.0354985	1.28508	0.00497026
TRINITY_DN14188_c0_g1	25.65	5	22.2251	5.56689	1.08121	0.143752	1.27879	0.00358589	1.38264	0.00180921
TRINITY_DN49804_c1_g1	24.24	9	51.9134	6.80029	0.639778	0.00395022	0.872708	0.139558	0.558339	0.00201857
TRINITY_DN52306_c0_g1	17.25	1	35.6393	9.21729	0.748904	0.307534	0.921343	0.723214	0.689997	0.138572
TRINITY_DN49519_c0_g3	15.7	1	39.1901	6.1001	1.34838	0.00811278	0.822846	0.00926938	1.10951	0.16002
TRINITY_DN51602_c3_g1	17.44	8	59.6881	8.5874	0.905923	0.0498454	0.766662	0.00123663	0.694537	0.00128488
TRINITY_DN53682_c2_g1	15.16	7	49.8115	8.55811	1.19329	0.010513	0.898493	0.0487129	1.07216	0.0207194
TRINITY_DN47195_c0_g1	43.56	8	18.8095	5.16064	1.03365	0.770646	2.06896	0.00101725	2.13858	0.00102721
TRINITY_DN53315_c0_g1	12.61	9	83.0604	8.99756	1.16477	0.00243632	0.994934	0.803892	1.15887	0.00256785
TRINITY_DN52228_c1_g2	22.81	4	31.6477	9.20264	0.905629	0.105588	1.0119	0.899986	0.916409	0.392974
TRINITY_DN8788_c0_g1	12.68	3	33.3794	9.56885	1.27841	0.0690392	0.771022	0.0268167	0.985683	0.904787
TRINITY_DN49155_c3_g2	12.38	5	61.5165	8.88037	1.0238	0.0495524	0.910225	0.221364	0.931887	0.344778
TRINITY_DN53334_c0_g2	27.98	4	25.1485	4.52588	1.04675	0.312369	0.992607	0.921901	1.03901	0.600387
TRINITY_DN50098_c1_g3	18.63	3	18.6478	7.81104	0.882877	0.100211	0.912266	0.204197	0.805419	0.00227097
TRINITY_DN41416_c0_g1	32.88	13	41.6499	5.70654	1.55847	0.00015519	1.03971	0.139381	1.62036	9.14327e-05
TRINITY_DN48960_c0_g1	19.01	3	15.1147	9.59814	0.542011	0.0045324	2.63417	9.6937e-06	1.42775	0.0067172
TRINITY_DN53674_c0_g1	12.3	7	75.6761	5.90967	0.775517	0.0449301	0.885036	0.0911671	0.68636	0.00954179
TRINITY_DN52751_c1_g3	48.7	5	13.0979	6.93213	1.2816	0.0204495	1.14282	0.0500126	1.46463	0.000529932
TRINITY_DN43073_c0_g1	11.11	10	116.87	6.771	1.28685	0.0229282	1.1694	0.0688991	1.50484	0.00226279
TRINITY_DN51725_c3_g1	21.74	5	26.7363	8.5874	0.54145	0.00763502	1.18638	0.0959452	0.642367	0.0187835
TRINITY_DN37025_c0_g1	34.03	6	16.5404	8.70459	1.28215	0.00772628	1.10462	0.0646944	1.41629	3.96073e-05
TRINITY_DN50326_c1_g1	18.09	8	45.1027	7.97217	1.50822	0.0145418	1.9528	0.00166281	2.94527	0.000471776
TRINITY_DN51170_c1_g3	21.6	3	26.9299	4.42432	1.45726	0.00744384	0.834292	0.0157121	1.21578	0.0598808
TRINITY_DN52127_c1_g2	11.34	9	103.446	5.79541	1.29021	0.00154195	0.824754	0.00535507	1.06411	0.190474
TRINITY_DN52346_c0_g7	18.64	12	71.8641	6.1001	0.92654	0.0157344	0.957155	0.143456	0.886843	0.0134278
TRINITY_DN51157_c0_g2	29.57	1	13.0277	5.17334	0.793704	0.082657	1.64782	0.00255186	1.30788	0.020429
TRINITY_DN45758_c0_g1	25.07	10	38.2526	5.78271	0.970881	0.655082	0.85959	0.0336126	0.83456	0.0195717
TRINITY_DN44407_c0_g1	29.82	7	27.9916	9.74463	1.3097	1.5674e-05	0.879013	0.0121405	1.15124	0.0117149
TRINITY_DN49042_c3_g2	14.33	8	64.7332	6.93213	0.715347	0.0016285	1.04729	0.223507	0.749175	0.00185222
TRINITY_DN49456_c0_g3	32.21	4	16.9728	7.21045	1.01932	0.611702	0.956147	0.282334	0.974621	0.46383
TRINITY_DN56059_c1_g1	20.34	5	37.8158	4.81787	1.43391	0.0578055	0.816602	0.183211	1.17093	0.0771049
TRINITY_DN52717_c0_g2	27.83	12	35.6916	8.79248	1.59124	0.000533526	1.08113	0.109434	1.72035	0.00034391
TRINITY_DN53030_c0_g1	49.24	7	15.1542	9.01221	1.01589	0.787176	0.975856	0.689003	0.991359	0.750526
TRINITY_DN51425_c1_g1	21.82	11	68.4283	5.22412	0.975288	0.375401	0.807629	0.00325171	0.787671	0.00360395
TRINITY_DN52670_c0_g1	14.21	9	81.7058	6.29053	1.17309	0.116027	0.795762	0.0131145	0.933504	0.409717
TRINITY_DN54046_c0_g4	4.75	12	285.024	6.0874	0.911966	0.108838	0.921041	0.111643	0.839958	0.0115576
TRINITY_DN54251_c1_g1	21.2	4	23.6069	6.31592	1.01008	0.88745	1.47992	0.00134483	1.49483	0.00025658
TRINITY_DN55330_c1_g1	11.11	2	26.6552	7.62061	0.365705	0.0140975	4.72887	0.00920748	1.72937	0.0863701
TRINITY_DN55042_c2_g2	15.74	11	76.2364	8.49951	0.618951	0.000282232	0.427262	0.00010839	0.264455	2.24472e-05
TRINITY_DN50405_c0_g2	20.5	6	30.8114	6.56592	1.03294	0.424537	0.737991	0.00203325	0.762301	0.00184365
TRINITY_DN49180_c0_g2	17.4	5	40.3531	5.021	0.891053	0.0525439	0.765067	0.00819508	0.681716	0.000475845
TRINITY_DN50718_c5_g3	25.71	4	15.5428	8.93896	4.46147	1.80783e-05	2.20665	0.041333	9.84488	0.00815886
TRINITY_DN41676_c0_g3	12.02	9	91.9588	5.65576	1.95732	0.000830271	0.770923	0.014889	1.50894	7.41673e-05
TRINITY_DN55378_c3_g2	7.95	10	132.026	6.21436	1.08156	0.00897842	0.949323	0.0521894	1.02675	0.197679
TRINITY_DN53000_c0_g8	43.38	1	15.6072	10.3013	0.907333	0.242054	1.08877	0.285553	0.987877	0.761443
TRINITY_DN9951_c0_g1	14.42	3	23.3529	6.72705	0.997349	0.959721	0.916425	0.0797671	0.913995	0.0792455
TRINITY_DN53150_c0_g1	17.17	15	103.97	6.32861	0.916437	0.0830913	1.03283	0.460365	0.946525	0.0104159
TRINITY_DN51304_c2_g1	40.94	6	17.5109	6.20166	1.10905	0.403375	0.972619	0.801736	1.07868	0.477774
TRINITY_DN54667_c0_g1	18.71	9	58.4414	6.01123	1.17435	0.00300322	0.764707	0.000465335	0.898031	0.0443542
TRINITY_DN41541_c0_g1	14.65	4	42.9365	7.41553	1.08431	0.515857	0.872304	0.281823	0.945847	0.456337
TRINITY_DN46823_c0_g1	20.24	1	28.128	4.75439	0.74503	0.0432657	1.05324	0.699151	0.784696	0.0702381
TRINITY_DN42838_c0_g1	24.24	4	14.432	4.88135	0.253942	4.28576e-05	0.902095	0.285827	0.22908	2.37102e-05
TRINITY_DN48582_c0_g1	29.7	7	33.9257	7.43018	1.30848	0.000107214	1.3103	0.010294	1.7145	0.0012415
TRINITY_DN54732_c0_g1	13.81	7	64.3495	9.56885	0.846677	0.0895844	0.949348	0.605496	0.80379	0.0219725
TRINITY_DN49870_c0_g1	15.51	9	62.4951	5.5415	0.835718	0.00579182	1.30223	0.00122072	1.08829	0.012426
TRINITY_DN51648_c2_g1	27.13	7	28.2253	6.44287	0.589607	1.29555e-06	0.959914	0.11619	0.565972	1.13914e-06
TRINITY_DN53439_c0_g4	11.36	8	89.8368	5.13525	1.28769	0.0151137	0.793956	0.0029135	1.02237	0.759363
TRINITY_DN49619_c0_g1	23.58	8	46.0672	5.79541	1.21584	0.00118316	1.26853	0.010796	1.54234	0.00162444
TRINITY_DN55234_c1_g1	24.64	7	38.8149	5.65576	1.12711	0.452532	3.42489	0.000181051	3.86023	0.000305576
TRINITY_DN49661_c0_g4	25.18	7	31.5332	7.88428	1.11213	0.0410489	0.86473	0.00221031	0.961696	0.374182
TRINITY_DN45253_c0_g1	11.96	4	51.2209	6.17627	0.864142	0.015177	0.820691	0.00882741	0.709193	0.000177033
TRINITY_DN46889_c0_g1	21.69	5	27.9936	8.5874	0.937599	0.411871	1.05719	0.494266	0.991219	0.812698
TRINITY_DN53322_c0_g2	14.93	4	37.5331	9.5249	0.764697	0.0176419	1.10052	0.225343	0.841562	0.0407454
TRINITY_DN48541_c0_g2	32.1	9	36.2365	6.7417	0.949454	0.579974	1.28548	0.0137623	1.2205	0.0648133
TRINITY_DN49176_c1_g3	10.94	4	29.585	4.58936	1.10492	0.0526312	1.08816	0.0130151	1.20234	0.00939952
TRINITY_DN53356_c0_g1	17.89	6	40.6073	5.98584	1.20812	0.00943705	0.996666	0.928453	1.20409	0.0080641
TRINITY_DN51533_c0_g1	11.64	13	161.401	4.90674	1.17106	0.0833705	1.02357	0.691596	1.19866	0.042172
TRINITY_DN49694_c1_g4	44.93	2	14.2314	6.53662	0.969301	0.848524	1.21474	0.188783	1.17745	0.097882
TRINITY_DN46874_c0_g2	6.48	5	115.207	4.95752	1.19903	0.0152575	0.719258	0.000387102	0.86241	0.0276659
TRINITY_DN53118_c1_g1	19.21	8	49.0188	8.89502	0.844675	0.099802	1.16063	0.0080605	0.980351	0.797306
TRINITY_DN50832_c1_g4	15.47	9	62.2683	5.40186	1.03544	0.681128	3.1169	3.46329e-05	3.22736	3.46795e-05
TRINITY_DN52974_c1_g2	9.24	6	102.406	7.1958	1.03696	0.438283	0.852774	0.0391755	0.884296	0.0424406
TRINITY_DN52460_c1_g4	6.69	6	92.1212	6.25244	1.00993	0.841622	0.930598	0.119871	0.939836	0.258584
TRINITY_DN53570_c0_g5	20.55	8	48.6903	9.64209	0.981124	0.566285	0.687982	3.401e-05	0.674995	0.000335111
TRINITY_DN54453_c0_g3	5.17	1	29.9022	8.42627	0.731817	0.0471355	1.70768	8.52647e-05	1.24971	0.0568926
TRINITY_DN55160_c2_g3	17.22	6	43.4825	4.91943	0.824041	0.0222231	1.12649	0.023938	0.928271	0.171843
TRINITY_DN51978_c2_g5	22.56	3	21.8712	8.71924	0.935256	0.160398	0.982174	0.68091	0.918584	0.0926249
TRINITY_DN49531_c0_g1	25.53	5	25.9504	6.66846	1.38646	0.0261187	1.10977	0.333505	1.53865	0.0140184
TRINITY_DN54633_c0_g2	20.45	8	54.8557	8.25049	0.878608	0.000942815	0.910707	0.0415399	0.800154	0.00231453
TRINITY_DN50122_c0_g1	22.74	7	35.7397	6.32861	1.19737	0.0178594	1.02919	0.542758	1.23232	0.00444384
TRINITY_DN54805_c1_g1	9.37	9	122.666	8.99756	0.934218	0.0565254	0.798143	0.000196097	0.74564	0.00059644
TRINITY_DN54918_c0_g1	11.71	8	96.375	6.30322	1.20162	0.0220594	1.29623	0.0262947	1.55757	0.00671666
TRINITY_DN45918_c0_g1	23.2	5	21.7834	8.27979	1.73728	0.0100174	1.04322	0.668759	1.81236	0.000350494
TRINITY_DN52633_c1_g1	21.62	9	49.6403	6.02393	0.643736	0.00162541	1.47589	0.00152031	0.950082	0.387445
TRINITY_DN48732_c2_g1	21.6	8	44.9308	7.59131	1.04814	0.0457972	1.21221	0.00726776	1.27056	0.00336527
TRINITY_DN48058_c0_g1	22.07	5	34.2193	10.77	1.17195	0.0232947	0.637624	0.00113507	0.747263	0.000330383
TRINITY_DN49163_c0_g3	16.74	7	50.2465	6.3667	1.13953	0.0446088	0.929572	0.162793	1.05927	0.193214
TRINITY_DN55362_c0_g1	14.23	8	58.8828	8.01611	1.00753	0.794908	0.85116	0.00496357	0.85757	0.000277954
TRINITY_DN50102_c1_g2	34.86	2	12.356	4.65283	1.08357	0.123722	0.916922	0.104581	0.993546	0.848692
TRINITY_DN54325_c0_g1	18.87	8	60.1055	7.88428	1.28248	0.016148	1.11448	0.10195	1.4293	0.000457752
TRINITY_DN52217_c2_g1	13.32	8	55.4729	5.05908	0.991251	0.799181	0.724546	0.000518017	0.718207	0.00036187
TRINITY_DN52232_c1_g1	11.38	9	73.5189	6.26514	1.10667	0.263098	1.0813	0.231512	1.19665	0.109678
TRINITY_DN48481_c0_g1	6.71	1	18.5888	4.83057	0.648073	0.00491236	1.10357	0.289532	0.715192	0.00770304
TRINITY_DN40655_c0_g1	13.84	7	52.0889	5.17334	0.76823	0.00900233	0.99502	0.930857	0.764404	0.00582406
TRINITY_DN54797_c1_g1	17.69	10	62.3834	6.18896	1.06039	0.133387	0.918708	0.0309157	0.974185	0.497127
TRINITY_DN48424_c0_g1	14.01	10	76.9697	8.07471	0.889039	0.00253963	0.984305	0.21673	0.875085	0.0019537
TRINITY_DN52082_c0_g1	32.76	2	13.1666	6.52197	0.435407	3.89978e-05	0.989068	0.815437	0.430648	3.64976e-05
TRINITY_DN51311_c1_g3	13.19	9	69.2612	8.92432	0.827346	0.00247466	0.99304	0.645212	0.821588	0.00208505
TRINITY_DN49305_c0_g4	5.24	8	183.48	8.25049	1.21403	0.0025194	0.876676	0.0209465	1.06431	0.260227
TRINITY_DN36335_c0_g1	33.76	8	26.5236	5.87158	1.38159	0.00495147	1.29169	0.00217789	1.78459	5.36967e-05
TRINITY_DN52290_c0_g2	19.03	2	28.0501	5.92236	1.14182	0.380617	0.933854	0.620755	1.06629	0.287146
TRINITY_DN37760_c0_g1	14.7	7	53.114	5.42725	1.01151	0.669974	0.783779	0.000801607	0.7928	0.000780611
TRINITY_DN50949_c0_g1	23.13	9	53.5702	6.46826	1.26863	0.00936082	1.00379	0.926243	1.27343	0.00108919
TRINITY_DN55062_c3_g1	17.17	6	35.45	8.90967	0.780456	0.0034433	0.884278	0.00241437	0.69014	0.000831445
TRINITY_DN52823_c3_g1	10.9	8	87.1518	9.29053	0.807448	0.0635109	1.03593	0.579498	0.836456	0.0545265
TRINITY_DN49114_c3_g3	19.42	9	57.9588	6.52197	1.08577	0.200104	0.867755	0.0285883	0.94218	0.204906
TRINITY_DN39396_c0_g1	15.12	3	19.0314	8.33838	1.04461	0.588599	1.03737	0.290141	1.08364	0.321409
TRINITY_DN53023_c0_g1	10.64	11	98.0791	6.62451	0.9502	0.121618	0.851594	0.00421856	0.809184	0.000127215
TRINITY_DN48601_c0_g2	15.41	1	57.4195	8.76318	0.616894	0.00659868	1.29875	0.0346461	0.80119	0.0191198
TRINITY_DN49615_c1_g1	15.83	10	62.5144	6.31592	1.29813	0.00128495	1.01133	0.727532	1.31284	0.000111319
TRINITY_DN55489_c0_g1	15.69	6	44.4882	9.26123	1.11942	0.181662	0.946421	0.517696	1.05944	0.253585
TRINITY_DN53835_c0_g2	16.54	5	42.7539	7.32764	1.51735	0.00393566	0.919514	0.145077	1.39523	0.0040493
TRINITY_DN48888_c0_g1	11.51	7	72.1063	6.37939	0.642058	0.00495325	0.992543	0.835969	0.637271	0.00389048
TRINITY_DN46932_c0_g1	8.26	10	126.767	5.30029	1.1431	0.120857	0.821044	0.0565782	0.938538	0.265873
TRINITY_DN52203_c0_g3	19.47	13	70.9465	8.04541	1.36141	0.000549105	0.683515	3.75845e-06	0.930547	0.134871
TRINITY_DN53749_c2_g2	12.49	10	93.0088	5.49072	0.931267	0.206631	0.917252	0.152053	0.854206	0.0036532
TRINITY_DN47721_c0_g1	28.63	6	25.4111	5.71924	1.00429	0.947822	0.837477	0.0305116	0.841072	0.0179874
TRINITY_DN48494_c0_g2	25.06	8	43.3189	8.33838	0.526383	1.59e-05	0.903269	0.0182502	0.475465	8.50479e-06
TRINITY_DN46996_c0_g1	12.17	3	33.7455	5.84619	0.966917	0.469142	1.23608	0.00736567	1.19519	0.00569572
TRINITY_DN46566_c0_g1	39.54	9	28.4243	7.78174	1.02015	0.716192	1.16759	0.000671654	1.19112	0.0173418
TRINITY_DN79949_c0_g1	37.87	10	25.2773	5.59229	2.5291	0.000128569	1.76229	0.00248182	4.457	0.000248867
TRINITY_DN44708_c0_g1	19.23	3	25.1939	6.48096	0.178859	0.00162337	1.14237	0.394829	0.204324	0.00197065
TRINITY_DN43120_c0_g1	30.08	7	28.6191	8.90967	1.23281	0.00325021	1.08098	0.0522591	1.33264	0.000382611
TRINITY_DN47394_c0_g1	36.41	5	23.0676	6.52197	0.884971	0.335867	1.87595	0.00743816	1.66016	0.00512648
TRINITY_DN43181_c0_g1	25.13	10	43.2488	9.21729	0.936709	0.223455	1.0206	0.445548	0.956003	0.364107
TRINITY_DN49414_c1_g3	26.03	5	26.5437	5.90967	0.649907	0.00120973	0.989355	0.854984	0.642989	0.000208179
TRINITY_DN51576_c1_g2	6.72	6	96.9957	8.5874	1.13634	0.00262583	1.37578	2.79136e-05	1.56335	9.2133e-06
TRINITY_DN52257_c1_g3	11.76	1	12.2391	10.6528	1.15503	0.0424187	1.1989	0.0829145	1.38476	0.0113527
TRINITY_DN53317_c1_g2	30.28	2	12.3292	7.28369	0.944149	0.623672	0.963825	0.762266	0.909995	0.100109
TRINITY_DN13324_c0_g1	14.4	10	96.2052	6.43018	1.07572	0.0653288	0.888805	0.0155698	0.956105	0.218077
TRINITY_DN45369_c0_g1	22.68	3	22.5038	9.51025	0.949392	0.711198	1.00335	0.981895	0.952568	0.662544
TRINITY_DN52821_c0_g2	19.26	5	27.8941	6.26514	1.0907	0.280752	1.46589	0.00200827	1.59884	0.000613322
TRINITY_DN55907_c1_g2	14.14	2	88.7786	8.98291	0.81886	4.54684e-05	0.807759	0.00958868	0.661441	0.000528101
TRINITY_DN50944_c0_g1	20.79	10	53.6493	6.13818	0.701474	0.00497964	1.06843	0.303749	0.749478	0.00635614
TRINITY_DN54950_c0_g1	40.58	2	15.6106	7.79639	1.04697	0.702773	0.852274	0.141044	0.892305	0.359788
TRINITY_DN52562_c1_g1	11.47	10	99.0459	5.04639	0.972704	0.540386	1.13857	0.0450312	1.10749	0.113962
TRINITY_DN52940_c1_g3	8.98	2	29.2796	8.70459	0.714788	0.0317262	1.77834	0.00385428	1.27114	0.0942634
TRINITY_DN53098_c0_g3	15.88	3	25.3305	6.68311	1.00864	0.909042	1.07652	0.339273	1.08582	0.00543427
TRINITY_DN51921_c0_g2	16.59	11	77.0656	9.33447	0.982774	0.511655	0.822834	0.011997	0.80866	0.00839003
TRINITY_DN49256_c3_g1	17.52	13	84.8419	5.79541	0.843035	0.0345363	0.996826	0.956278	0.840358	0.0189147
TRINITY_DN50780_c2_g3	4.68	3	82.4786	7.7085	0.822198	0.15322	0.838482	0.214479	0.689398	0.011023
TRINITY_DN51670_c1_g3	47.37	6	12.4308	5.07178	6.86039	0.000880705	1.70077	0.00266338	11.6679	3.8659e-06
TRINITY_DN49564_c0_g1	32.65	14	48.7398	8.32373	0.78212	0.0016932	0.807546	0.00179573	0.631598	8.60949e-05
TRINITY_DN49743_c1_g1	31.21	2	14.6947	4.58936	1.12612	0.114047	0.931654	0.180115	1.04915	0.310225
TRINITY_DN48531_c0_g1	28.57	3	15.0802	10.2134	1.23653	0.0770017	1.04515	0.651118	1.29236	0.0121883
TRINITY_DN53013_c1_g4	28.24	8	28.2138	8.74854	0.860339	0.151971	1.22083	0.0319562	1.05033	0.548386
TRINITY_DN55906_c1_g3	54.55	4	17.8153	7.28369	1.04155	0.606771	1.05389	0.394367	1.09768	0.283087
TRINITY_DN13009_c0_g1	12.39	5	51.2394	5.98584	0.866332	0.105695	0.913878	0.252196	0.791721	0.00326544
TRINITY_DN44987_c0_g1	28.02	5	25.601	8.60205	0.83545	0.00466576	1.01858	0.607825	0.850973	0.000647636
TRINITY_DN46735_c0_g1	24.44	5	36.5802	4.70361	1.14823	0.199306	1.94584	8.30091e-05	2.23428	0.000102953
TRINITY_DN50882_c0_g1	8.02	8	108.398	6.30322	2.2413	0.000260878	1.2473	0.0107999	2.79558	8.47923e-05
TRINITY_DN44327_c0_g1	15.23	7	57.4996	8.19189	0.720661	0.00371951	1.03976	0.338937	0.749318	0.00708253
TRINITY_DN51052_c1_g5	19.65	3	19.2578	5.42725	2.58408	2.77239e-06	2.18086	1.90076e-05	5.63552	3.23935e-06
TRINITY_DN51530_c0_g2	16.07	6	57.1837	8.25049	1.0382	0.616455	1.28781	0.0102844	1.33701	0.000331456
TRINITY_DN51768_c1_g3	11.46	8	74.7309	7.18115	0.852202	0.00433619	1.05017	0.0410134	0.894956	0.00971719
TRINITY_DN50903_c0_g4	22.7	8	38.1711	6.13818	1.02155	0.865812	1.40483	0.007976	1.4351	0.0130917
TRINITY_DN49542_c2_g7	9.79	14	173.373	8.39697	0.707202	0.00256822	1.01943	0.182672	0.720945	0.0031227
TRINITY_DN45217_c0_g1	24.24	2	10.5147	7.18115	1.12727	0.033343	1.5257	0.0244327	1.71988	0.0118927
TRINITY_DN46169_c0_g1	31.61	6	17.1839	9.61279	1.84993	0.0406696	1.70801	0.0201377	3.1597	0.000973437
TRINITY_DN54783_c0_g1	33.09	10	29.9577	9.11475	0.809443	0.0270952	0.886523	0.0382779	0.717589	0.0103319
TRINITY_DN50172_c0_g1	8.75	4	60.4481	6.354	0.658204	0.027425	1.0423	0.75122	0.686049	0.0113837
TRINITY_DN54507_c1_g7	7.21	2	57.9954	5.93506	0.680634	0.0723535	2.28373	0.00111983	1.55438	0.0295284
TRINITY_DN54315_c3_g1	8.08	6	82.2756	5.08447	0.865406	0.014265	0.979863	0.5935	0.84798	0.000580093
TRINITY_DN53097_c1_g1	8.9	4	69.732	5.46533	1.34934	0.00428328	0.895016	0.0856312	1.20768	0.00138101
TRINITY_DN52048_c0_g1	21.98	3	26.6474	5.021	0.897893	0.0263555	1.09751	0.0390039	0.985446	0.388498
TRINITY_DN54090_c3_g1	39.39	5	17.5087	5.47803	0.929992	0.365124	1.12794	0.0157636	1.04897	0.54325
TRINITY_DN45327_c0_g1	48.44	19	35.3104	6.17627	1.03241	0.480416	0.90605	0.0621866	0.935414	0.154887
TRINITY_DN46856_c0_g1	27.78	2	12.0737	5.93506	0.84462	0.169142	1.04703	0.64874	0.884344	0.289872
TRINITY_DN51363_c0_g3	12.94	8	77.7176	7.43018	0.710133	0.00773398	0.927504	0.510698	0.658651	0.00772763
TRINITY_DN47914_c0_g1	70.15	7	14.9524	5.021	1.24131	0.00451275	1.46942	0.0064745	1.82401	0.00201892
TRINITY_DN45719_c0_g1	16.63	6	53.0789	6.45557	1.17601	0.00379049	1.10956	0.015	1.30485	0.000190557
TRINITY_DN53997_c1_g1	21.37	8	38.4074	7.92822	1.04149	0.539276	0.974224	0.631562	1.01465	0.708966
TRINITY_DN52879_c1_g1	4.75	3	117.962	5.8335	1.22808	0.0455329	0.910285	0.24283	1.1179	0.00359382
TRINITY_DN45899_c0_g2	5.16	6	149.214	4.91943	1.03656	0.389927	0.906164	0.0680945	0.939289	0.29579
TRINITY_DN52099_c3_g1	22.22	7	30.3957	5.66846	1.26489	0.000301516	0.677273	2.46114e-05	0.856678	0.00718356
TRINITY_DN50001_c5_g4	6.04	6	121.95	5.5542	1.34132	0.00415338	0.79729	0.0145392	1.06942	0.293675
TRINITY_DN55842_c5_g1	23.73	4	20.5794	5.94775	4.92337	0.000179277	2.09857	5.85504e-05	10.332	8.23375e-08
TRINITY_DN46675_c0_g1	16.22	4	24.6017	5.5415	0.607984	0.00427239	0.941819	0.161971	0.57261	0.0032908
TRINITY_DN45853_c0_g1	20.24	15	91.5375	9.1001	1.23719	0.00489657	1.07056	0.090384	1.32448	0.000312443
TRINITY_DN52065_c1_g1	9.9	6	65.7548	6.78564	1.17767	0.00245552	1.02584	0.269105	1.20811	9.97163e-05
TRINITY_DN54821_c2_g1	14.22	2	23.7578	7.79639	1.02733	0.89114	1.60513	0.0256836	1.64899	0.0310279
TRINITY_DN45249_c0_g1	15.69	8	60.3084	8.89502	1.04198	0.600545	1.11084	0.151198	1.15747	0.0899583
TRINITY_DN53189_c0_g2	37.59	8	31.8248	5.77002	1.21012	0.016911	0.983145	0.684124	1.18973	0.0175451
TRINITY_DN50833_c2_g1	16.06	2	30.4876	6.82959	1.64513	0.00870916	0.98191	0.845758	1.61537	0.00513181
TRINITY_DN54404_c0_g3	28.57	1	12.4829	10.228	1.0402	0.511519	0.842294	0.0273438	0.876156	0.0377823
TRINITY_DN54576_c1_g1	20.09	6	49.0108	5.32568	0.976685	0.191682	1.00805	0.640506	0.98455	0.100193
TRINITY_DN48965_c0_g1	29.45	7	30.3621	7.86963	1.1488	0.065642	0.675569	0.00395321	0.776096	0.00135687
TRINITY_DN38946_c0_g1	21.53	5	22.5773	8.104	0.869019	0.129015	1.16423	0.0558938	1.01173	0.801387
TRINITY_DN50061_c0_g2	11.4	9	94.3831	6.60986	0.812344	0.0029468	1.00781	0.843384	0.818689	5.42413e-05
TRINITY_DN53423_c0_g1	26.84	7	20.862	7.23975	0.571752	0.00140436	1.35334	0.00501837	0.773774	0.0206912
TRINITY_DN52620_c0_g1	13.29	5	54.2947	5.46533	0.822335	0.00227484	1.00126	0.979653	0.82337	0.013847
TRINITY_DN54184_c2_g3	27.92	2	16.7016	6.771	0.697977	0.0173753	0.809578	0.176178	0.565067	0.000571682
TRINITY_DN52967_c0_g1	20.88	11	48.1235	9.34912	0.888589	0.407122	0.858872	0.0803471	0.763185	0.103557
TRINITY_DN12733_c0_g1	25.08	10	35.3081	9.61279	1.15562	0.00301447	0.947496	0.0470204	1.09495	0.016649
TRINITY_DN55813_c2_g1	27.7	9	39.03	5.04639	0.877122	0.0605278	1.1262	0.0661203	0.987819	0.728471
TRINITY_DN54708_c0_g1	21.27	9	53.6348	5.18604	1.19987	0.01677	0.849795	0.0412426	1.01965	0.728476
TRINITY_DN48085_c1_g1	15.26	9	87.0173	4.41162	0.904741	0.232665	1.03481	0.183556	0.93624	0.384703
TRINITY_DN52122_c0_g3	12.26	10	94.7887	6.1001	0.941384	0.50036	0.877028	0.223171	0.82562	0.00934982
TRINITY_DN49549_c2_g2	19.75	4	25.2857	6.39209	1.08276	0.583115	0.913543	0.307752	0.989152	0.942189
TRINITY_DN46112_c0_g1	21.13	5	23.7361	6.78564	0.940255	0.098344	0.916452	0.0195886	0.861699	0.0160728
TRINITY_DN51867_c1_g6	22.17	6	26.2042	6.55127	0.800587	0.0349684	0.950597	0.445341	0.761036	0.0258797
TRINITY_DN45379_c0_g1	16.34	3	22.5744	5.66846	0.625367	0.0070726	1.23493	0.111576	0.772283	0.0891205
TRINITY_DN51495_c2_g3	25.82	7	34.0961	5.64307	1.04029	0.639609	0.886962	0.126964	0.922696	0.316648
TRINITY_DN52066_c0_g1	27.42	4	22.1525	8.47021	0.940199	0.149097	1.04988	0.205783	0.987092	0.369325
TRINITY_DN50058_c2_g1	14.86	5	56.1106	9.62744	1.12245	0.20878	1.08658	0.45206	1.21963	0.0940021
TRINITY_DN44600_c0_g1	22.6	4	23.1562	4.70361	0.976818	0.694498	0.936147	0.336298	0.914446	0.0521641
TRINITY_DN54781_c1_g1	31.19	6	21.8208	7.85498	1.42321	0.0136029	0.798632	0.0311222	1.13662	0.0944292
TRINITY_DN49398_c2_g4	15.97	4	28.6751	8.54346	1.0148	0.672566	1.26514	0.000133746	1.28386	0.00161764
TRINITY_DN49945_c0_g2	13.71	2	53.152	8.1626	0.838084	0.171235	0.926015	0.593714	0.776078	0.0172942
TRINITY_DN52526_c1_g2	43.87	5	16.7916	8.67529	0.910251	0.599898	1.29585	0.102622	1.17955	0.408502
TRINITY_DN53029_c1_g2	8.03	8	123.799	6.58057	1.14809	0.0131593	0.827218	0.00101049	0.949718	0.194153
TRINITY_DN53929_c0_g2	16.03	6	47.023	4.64014	0.912038	0.55749	1.1955	0.195495	1.09034	0.355199
TRINITY_DN53051_c1_g1	52.23	13	23.606	10.7554	1.43402	0.000498982	0.471907	0.00019311	0.676724	0.00198054
TRINITY_DN50214_c0_g2	6.05	1	37.2375	9.01221	1.99627	0.000751653	1.13499	0.386542	2.26574	0.0116359
TRINITY_DN46102_c0_g1	31.75	7	27.9523	9.17334	1.47427	0.00907925	2.12851	0.00358935	3.13801	0.00155503
TRINITY_DN40363_c0_g1	19.95	6	39.0408	8.95361	1.10616	0.170581	1.38814	0.012497	1.53551	0.00290242
TRINITY_DN49610_c3_g1	24.92	8	36.0216	4.61475	1.33383	0.00901376	1.03876	0.31235	1.38553	0.0037197
TRINITY_DN52031_c1_g3	25.53	4	16.3431	6.18896	1.07545	0.495403	1.13297	0.155949	1.21846	0.143498
TRINITY_DN54164_c1_g2	18.63	7	62.4762	6.45557	1.17375	0.14847	0.789539	0.0619453	0.926724	0.0322053
TRINITY_DN55364_c2_g1	13.27	1	43.2126	8.17725	0.934426	0.190296	0.903194	0.093774	0.843968	0.00224478
TRINITY_DN31229_c0_g1	8.3	2	29.8307	5.03369	0.968257	0.605116	0.96735	0.629906	0.936644	0.328007
TRINITY_DN49257_c1_g4	38.8	10	27.623	6.3667	0.991036	0.597776	1.06115	0.0498906	1.05163	0.081961
TRINITY_DN47344_c0_g1	65.52	10	15.9181	9.61279	1.03726	0.337616	0.844808	0.0077031	0.876282	0.00142142
TRINITY_DN50385_c1_g1	22.3	9	49.9886	5.42725	0.69489	0.00367941	1.55899	0.0223263	1.08333	0.51377
TRINITY_DN49800_c1_g1	17.58	10	49.0524	8.08936	0.821617	0.00383297	1.11964	0.024421	0.919913	0.0342572
TRINITY_DN48599_c0_g1	15.41	5	33.2076	11.019	1.05717	0.338705	0.846802	0.00973838	0.895212	0.0653122
TRINITY_DN54328_c3_g2	14.57	6	50.1852	9.34912	0.766464	0.0382496	1.13156	0.180282	0.867296	0.182936
TRINITY_DN44691_c0_g2	20.22	4	20.5895	8.77783	0.94955	0.334561	0.882099	0.0358154	0.837597	0.0207322
TRINITY_DN51945_c1_g1	33.46	8	28.5013	8.63135	1.14008	0.0232535	1.01901	0.617839	1.16175	0.0238121
TRINITY_DN51299_c0_g1	9.6	5	78.9918	5.65576	3.07417	5.09821e-05	0.996778	0.951557	3.06426	0.000122905
TRINITY_DN45566_c0_g1	11.02	4	43.3251	8.20654	1.13833	0.170542	0.953556	0.560582	1.08546	0.269191
TRINITY_DN53263_c2_g5	9.38	2	29.0174	4.93213	1.03591	0.628707	1.00684	0.85164	1.043	0.602528
TRINITY_DN53711_c0_g3	11.05	3	43.0159	8.57275	1.0593	0.339786	1.05601	0.110314	1.11863	0.0718285
TRINITY_DN53861_c0_g2	7.77	7	99.1047	6.22705	1.49455	0.00667851	1.01533	0.685495	1.51747	0.00668318
TRINITY_DN54890_c1_g3	12.52	6	61.6942	6.29053	0.912474	0.180731	0.900706	0.148067	0.821871	0.0110767
TRINITY_DN40601_c0_g1	40.44	5	15.1039	5.68115	0.81359	0.0284052	0.933751	0.330637	0.759691	0.000882139
TRINITY_DN55930_c1_g1	12.81	6	73.4321	5.22412	1.00843	0.886201	1.11792	0.00571434	1.12735	0.0868683
TRINITY_DN48280_c1_g1	10.35	8	94.5793	4.83057	1.03096	0.272571	1.06461	0.129142	1.09758	0.0708338
TRINITY_DN43666_c0_g1	11.78	4	51.3806	5.32568	0.984348	0.664268	1.11308	0.0602092	1.09566	0.0237769
TRINITY_DN41069_c0_g1	13.61	2	62.4883	6.48096	1.14854	0.0376721	0.925047	0.032219	1.06245	0.227352
TRINITY_DN51194_c1_g3	41.51	3	12.063	4.53857	0.9332	0.258553	0.622592	0.00260496	0.581003	6.7958e-05
TRINITY_DN55401_c1_g1	20.97	5	34.4282	6.45557	0.793585	0.00487294	0.849055	0.00208645	0.673797	0.00100598
TRINITY_DN36857_c0_g1	14.91	6	58.0138	6.48096	0.574454	0.000455397	0.789161	0.0156425	0.453336	4.05483e-05
TRINITY_DN49728_c2_g2	33.16	5	21.1563	3.96729	1.18465	0.0009926	0.841158	0.0077442	0.99648	0.934684
TRINITY_DN54739_c0_g2	13.89	7	59.8834	5.31299	1.32898	0.0180664	0.790062	0.0644663	1.04998	0.581479
TRINITY_DN52150_c4_g2	21.38	7	32.3734	5.19873	0.598192	0.00933321	1.06618	0.194394	0.63778	0.0119211
TRINITY_DN45274_c0_g1	32.95	7	28.6079	4.62744	0.824124	0.151901	1.30341	0.0511264	1.07417	0.419042
TRINITY_DN51766_c3_g1	8.47	4	51.5448	6.87354	1.00652	0.863375	0.986706	0.652097	0.993138	0.840675
TRINITY_DN55628_c3_g4	27.98	10	43.7651	9.33447	1.00071	0.977982	0.735592	8.41525e-06	0.736114	0.000449917
TRINITY_DN53751_c3_g2	8.63	7	86.2508	8.51416	1.46058	0.00266325	0.877826	0.0221998	1.28214	0.00567133
TRINITY_DN48837_c0_g1	25.46	10	50.1052	6.59521	0.868461	0.125269	1.08174	0.201448	0.939447	0.292744
TRINITY_DN48590_c3_g3	8.07	9	116.141	5.42725	0.817464	0.00221268	0.940974	0.164297	0.769212	0.000229078
TRINITY_DN53954_c1_g2	13.08	6	65.1355	7.29834	0.468061	0.000278854	0.973841	0.540733	0.455817	0.000205715
TRINITY_DN55780_c1_g1	5.34	5	99.1424	6.02393	0.566251	0.00109806	1.09585	0.00270461	0.620529	0.00190568
TRINITY_DN44846_c0_g1	12.13	4	48.2508	9.48096	0.578999	0.000727983	0.986568	0.856765	0.571222	6.25405e-05
TRINITY_DN50925_c0_g1	14.88	2	31.8104	4.91943	1.28602	0.111202	0.850073	0.268531	1.09321	0.372824
TRINITY_DN48991_c2_g1	36.84	2	12.6191	11.3706	1.01358	0.813979	0.87382	0.0329764	0.885689	0.0562118
TRINITY_DN55890_c1_g2	43.59	9	26.3307	6.81494	0.880126	0.124676	0.954294	0.45679	0.839899	0.0524954
TRINITY_DN53297_c1_g7	25.6	8	36.3463	7.7085	1.10061	0.287218	1.27164	0.0446264	1.39958	0.00396668
TRINITY_DN49414_c1_g1	39.81	8	21.543	8.41162	1.35875	0.00406628	1.47063	0.000370422	1.99822	0.000245585
TRINITY_DN49011_c0_g1	20.98	4	65.7768	6.85889	1.05869	0.286911	0.944224	0.345285	0.99964	0.992047
TRINITY_DN47957_c0_g2	17.61	7	39.4195	8.76318	0.588839	9.2438e-06	0.703168	0.00161391	0.414052	6.91388e-06
TRINITY_DN48868_c0_g3	27.38	6	28.8191	8.68994	1.12766	0.00295352	1.32137	0.00146413	1.49006	0.0003408
TRINITY_DN55405_c1_g1	14.26	3	58.6778	8.20654	0.844446	0.0274433	1.14087	0.00982739	0.963403	0.454282
TRINITY_DN52915_c0_g1	35.57	4	16.6424	8.17725	1.15474	0.0221806	1.52055	7.40829e-05	1.75584	1.77579e-05
TRINITY_DN54567_c1_g3	18.69	5	31.7071	5.42725	0.641564	0.0518547	1.2391	0.166876	0.794965	0.150357
TRINITY_DN55658_c1_g2	18.46	4	49.1361	6.81494	0.804418	0.280599	1.25538	0.148728	1.00985	0.945217
TRINITY_DN53635_c1_g3	23	3	21.657	6.60986	0.913143	0.660609	0.724515	0.170912	0.661586	0.086678
TRINITY_DN55650_c4_g1	13.48	5	51.4826	5.46533	0.912351	0.0575434	1.04627	0.27429	0.954565	0.0249503
TRINITY_DN52260_c2_g2	31.73	3	11.6209	7.25439	0.73835	0.011904	0.897861	0.26964	0.662936	0.000908432
TRINITY_DN49670_c1_g4	12.57	1	36.8262	10.6968	0.994453	0.949357	0.82259	0.0788792	0.818027	0.07863
TRINITY_DN52159_c0_g1	23.36	5	29.9714	6.53662	0.536107	0.00526127	0.706803	0.0761156	0.378922	0.00031017
TRINITY_DN52760_c1_g1	12.1	6	65.6119	7.51807	0.744005	1.8419e-05	0.904838	0.0534391	0.673205	0.000178895
TRINITY_DN53948_c0_g1	11.9	4	39.3695	6.17627	1.07067	0.111928	0.989965	0.78216	1.05993	0.23186
TRINITY_DN46422_c0_g1	15.51	5	34.1139	4.65283	1.55294	0.0021873	1.27288	0.00560026	1.97671	3.59412e-05
TRINITY_DN55975_c6_g1	24.02	5	20.3936	8.39697	3.27563	4.55588e-05	1.9567	5.33864e-05	6.40944	5.22602e-06
TRINITY_DN54681_c0_g3	33.53	4	18.6365	8.20654	0.777918	0.0128665	1.15205	0.00940763	0.896203	0.0935358
TRINITY_DN51714_c1_g1	47.47	7	18.057	4.62744	0.740033	0.136637	1.15667	0.257746	0.855974	0.406143
TRINITY_DN30832_c0_g1	20.46	7	33.8286	9.68604	1.0075	0.848187	1.04871	0.164278	1.05658	0.19016
TRINITY_DN55062_c2_g1	10.73	1	25.5997	7.51807	1.0893	0.435336	1.41686	0.0549934	1.54339	0.0248735
TRINITY_DN55223_c1_g2	17.34	3	19.5318	5.23682	0.725252	0.000315034	1.21658	0.0449529	0.882329	0.117251
TRINITY_DN37935_c0_g1	4.62	3	83.3892	6.43018	0.804118	0.0791229	0.83717	0.185038	0.673183	0.00568328
TRINITY_DN54015_c0_g1	8.81	3	38.1149	5.18604	0.271496	7.08796e-05	1.85908	0.00444339	0.504733	0.000419036
TRINITY_DN54576_c0_g1	13.11	3	26.9074	10.0229	0.269343	0.000182197	0.836388	0.243785	0.225275	6.33028e-05
TRINITY_DN53137_c0_g4	14.23	4	29.902	5.97314	1.26617	0.0179368	1.27761	0.00618079	1.61768	0.000345026
TRINITY_DN50575_c0_g1	26.77	4	22.4625	9.42236	1.06908	0.160554	1.07816	0.0656763	1.15263	0.00629963
TRINITY_DN49700_c0_g2	18.11	3	13.0976	8.85107	1.84233	0.00478457	5.53296	0.00148826	10.1936	0.00101076
TRINITY_DN43127_c0_g1	9.24	7	77.5503	5.59229	0.919708	0.200142	0.756157	0.00180727	0.695444	0.00251571
TRINITY_DN51522_c1_g3	9.11	5	55.3422	6.84424	0.775589	0.0399137	0.928855	0.425215	0.72041	0.00645724
TRINITY_DN49823_c0_g1	25.13	4	22.3245	9.21729	0.645261	0.00166157	0.885285	0.0572174	0.57124	0.000645789
TRINITY_DN54459_c2_g1	15.23	6	49.8411	6.58057	1.1044	0.379989	1.07309	0.245258	1.18511	0.154788
TRINITY_DN50389_c0_g2	16.55	3	33.1745	9.5249	0.733509	0.0345743	0.892978	0.039292	0.655007	0.017581
TRINITY_DN45840_c0_g1	20.57	6	30.6609	9.36377	1.59699	0.00343488	1.48738	0.00246614	2.37533	3.95017e-05
TRINITY_DN50135_c0_g1	23.53	2	29.1554	4.7417	0.854895	0.17487	1.44495	0.0600608	1.23528	0.196981
TRINITY_DN11741_c0_g1	27.1	8	41.2617	5.99854	0.745688	0.0194579	0.741355	0.00902674	0.552819	0.00233829
TRINITY_DN46618_c0_g1	8.7	5	53.0659	5.21143	0.900961	0.177999	0.756013	0.0316898	0.681139	0.00381756
TRINITY_DN49237_c0_g1	11.4	5	54.046	8.68994	1.06768	0.268533	0.833585	0.00994102	0.889999	0.0448072
TRINITY_DN55189_c6_g1	16.56	6	35.5501	8.00146	1.16062	0.0165581	1.05332	0.0375568	1.2225	0.00497184
TRINITY_DN56072_c3_g2	7.06	1	76.078	7.26904	0.887878	0.016966	1.13158	0.0575467	1.0047	0.925752
TRINITY_DN48697_c3_g3	16.22	8	51.4986	8.67529	0.922296	0.0369321	0.915584	0.053927	0.844439	0.00640556
TRINITY_DN55276_c0_g7	18.69	5	35.3625	8.33838	2.27669	4.38624e-05	2.38828	0.000199655	5.43736	4.52392e-05
TRINITY_DN50947_c7_g1	5.58	1	23.1544	5.31299	1.19506	0.330323	0.972299	0.847157	1.16195	0.279451
TRINITY_DN48948_c1_g4	6.7	4	87.1334	6.21436	4.21542	1.48504e-05	1.41465	0.00133239	5.96333	1.13727e-05
TRINITY_DN52460_c1_g1	13.41	10	69.7148	5.37646	1.0574	0.259526	0.958981	0.337032	1.01403	0.735344
TRINITY_DN41489_c0_g1	15.75	7	57.6248	6.75635	1.0567	0.429829	0.801493	0.0206196	0.846935	0.0113248
TRINITY_DN50238_c0_g1	14.24	7	63.9792	7.03467	1.06107	0.0146297	1.14626	0.000657625	1.21626	0.000301361
TRINITY_DN42516_c0_g1	29.92	3	13.7842	10.0962	1.6437	0.000285159	0.987761	0.678874	1.62358	0.000148247
TRINITY_DN53489_c0_g4	14.67	10	67.202	8.23584	0.879606	0.0422674	0.878512	0.0601154	0.772745	1.49153e-05
TRINITY_DN53058_c2_g4	14.2	9	70.1719	9.17334	1.35256	0.000862236	0.81326	0.00209343	1.09998	0.0189204
TRINITY_DN54446_c4_g1	24.17	4	26.6366	10.228	0.981292	0.820718	0.961684	0.415417	0.943693	0.458056
TRINITY_DN53899_c0_g1	17.36	6	35.0325	9.02686	1.28123	0.0158335	1.79837	0.000433922	2.30412	0.000204312
TRINITY_DN55632_c1_g3	23.86	4	20.1212	5.93506	0.977292	0.701591	0.876767	0.0222676	0.856857	0.0632252
TRINITY_DN43362_c0_g1	20.15	6	46.4221	4.94482	0.908537	0.390869	1.30944	0.0477282	1.18968	0.215223
TRINITY_DN52833_c0_g2	18.93	3	36.4456	5.78271	0.664552	0.000972696	0.81567	0.0291024	0.542055	0.000166733
TRINITY_DN48738_c1_g1	7.28	14	222.894	6.27783	1.05106	0.0245172	0.882838	0.0018455	0.927918	0.0015115
TRINITY_DN50208_c0_g1	10.07	9	83.2214	5.61768	0.97559	0.634894	1.04536	0.2721	1.01984	0.636926
TRINITY_DN4269_c0_g1	20.75	3	12.3546	9.43701	0.636696	0.0116153	0.377641	0.00804384	0.240443	4.63124e-06
TRINITY_DN13237_c0_g1	26.02	2	13.5947	6.62451	1.10514	0.0623946	1.05151	0.258373	1.16207	0.0198612
TRINITY_DN52433_c2_g1	4.26	10	236.246	5.51611	1.06353	0.271875	1.02429	0.605944	1.08936	0.0307544
TRINITY_DN53029_c0_g1	18.12	9	50.4374	6.32861	1.6609	4.39298e-05	1.35718	0.00554287	2.25414	0.000272736
TRINITY_DN49909_c5_g2	15.06	6	38.9341	6.45557	0.905744	0.208092	1.6156	0.0015559	1.46332	0.00516051
TRINITY_DN48948_c1_g2	11.79	14	121.472	9.59814	0.914287	0.142771	0.832212	0.0297536	0.76088	0.000390051
TRINITY_DN49484_c1_g1	33.05	5	13.1841	10.2427	1.43785	0.00883333	0.957913	0.522706	1.37734	0.000800131
TRINITY_DN36349_c0_g1	18.54	7	50.3314	5.49072	1.21687	0.108535	0.949213	0.567995	1.15507	0.04442
TRINITY_DN45171_c0_g1	17.02	3	30.4434	5.24951	0.686652	0.00112583	1.1389	0.0920071	0.78203	0.000595787
TRINITY_DN49205_c1_g1	8.03	10	120.837	4.69092	0.840178	0.0110345	0.682057	0.000989287	0.57305	6.99933e-05
TRINITY_DN48746_c0_g3	17.22	3	29.978	6.58057	0.489349	0.0097885	1.10615	0.148878	0.541292	0.0137596
TRINITY_DN21543_c0_g1	21.39	6	38.1638	7.53271	1.05144	0.396828	1.33116	0.00419015	1.39964	0.000185105
TRINITY_DN54184_c1_g1	22.58	4	20.9684	4.36084	0.897976	0.114024	1.09972	0.460481	0.987521	0.922289
TRINITY_DN55865_c1_g1	17.17	4	42.0642	6.82959	0.979479	0.540829	1.39019	0.00219872	1.36166	0.00153095
TRINITY_DN52669_c0_g2	27.23	12	53.2423	6.11279	0.748023	0.00136425	0.996204	0.94573	0.745184	0.00636826
TRINITY_DN52187_c2_g1	41.9	2	11.6355	10.3306	1.04432	0.354964	0.902625	0.0150257	0.942631	0.204852
TRINITY_DN54912_c0_g2	4.55	8	184.118	6.63916	1.00795	0.845931	1.09467	0.0678335	1.10337	0.0357259
TRINITY_DN50817_c0_g3	7.12	1	40.598	4.95752	0.719769	0.000219733	1.26197	0.0141764	0.908327	0.141727
TRINITY_DN3370_c0_g1	12.99	4	25.2081	8.68994	0.826523	0.01512	1.54751	0.000291425	1.27905	0.00131473
TRINITY_DN46398_c0_g1	23.59	4	21.5251	7.03467	1.20197	0.0117317	1.12067	0.127088	1.347	0.00932707
TRINITY_DN53980_c0_g2	14.86	8	61.3185	8.85107	1.01098	0.853748	1.02349	0.601844	1.03472	0.530537
TRINITY_DN43252_c0_g1	19.93	11	64.043	6.85889	0.587194	0.00022775	1.09183	0.148735	0.641113	0.000119936
TRINITY_DN50694_c0_g2	23.84	13	56.3348	7.07861	0.824906	0.011931	1.15612	0.0679743	0.953687	0.503492
TRINITY_DN42205_c0_g1	22.1	9	48.2365	6.52197	0.853804	0.00252823	0.926469	0.0202035	0.791023	0.000344671
TRINITY_DN37748_c0_g2	21.8	7	29.7154	10.2866	1.18968	0.000110374	1.14197	0.0210024	1.35858	0.0013415
TRINITY_DN47978_c6_g4	38	6	22.7512	6.40479	1.20384	0.485759	1.67276	0.0553034	2.01373	0.0273203
TRINITY_DN55498_c1_g1	6.17	3	40.3042	7.13721	1.01971	0.7979	0.978336	0.772272	0.997619	0.952541
TRINITY_DN51509_c1_g1	5.68	2	57.0178	10.0962	1.21173	0.0386992	1.03488	0.337494	1.25399	0.0251753
TRINITY_DN55984_c1_g1	7.24	10	139.348	6.17627	1.43719	0.00278463	1.05074	0.188878	1.51012	0.0012042
TRINITY_DN51419_c0_g1	6.56	4	79.5818	6.30322	1.11616	0.0699859	0.914186	0.0276952	1.02038	0.655431
TRINITY_DN55755_c3_g2	21.79	9	38.2217	6.88818	1.31268	0.0124559	1.07136	0.193313	1.40635	0.00918585
TRINITY_DN53153_c1_g1	21.09	6	33.7736	8.54346	1.64652	0.00756271	2.10759	0.000356371	3.47019	2.06853e-05
TRINITY_DN54190_c4_g2	36.05	4	17.1278	8.89502	1.40703	0.000631787	0.865442	0.00820357	1.2177	0.000259029
TRINITY_DN45344_c0_g1	22.41	5	31.7805	9.17334	1.07814	0.145304	1.14945	0.0131097	1.23927	0.00106735
TRINITY_DN44611_c0_g1	48.29	9	22.9307	7.98682	1.1827	0.0639266	1.0389	0.519175	1.22871	0.00249868
TRINITY_DN48983_c1_g1	7.21	3	61.7157	6.23975	0.93095	0.663433	1.05612	0.657748	0.983193	0.891789
TRINITY_DN50489_c3_g1	42.13	4	15.1342	11.4878	0.91711	0.63425	1.71165	0.00800145	1.56977	0.00626355
TRINITY_DN48456_c0_g2	33.33	6	18.5606	9.24658	1.15865	0.0578369	1.01481	0.789301	1.17581	1.34613e-05
[truncated: 4,271 more rows]
