# Supplementary material for: Large-Scale Quantitative Proteomic Analysis during Different Stages of Somatic Embryogenesis in Larix olgensis
Source: Curr Issues Mol Biol. 2023 Mar 1;45(3):2021–34. doi: 10.3390/cimb45030130 (PMC10047913; doi:10.3390/cimb45030130)
Supplement: Supplementary file 1 [file cimb-45-00130-s001.zip › Table S3-Details of hierarchical cluster analysis of DEPs.xlsx]

## Sheet: Table S3
Table S3 Details of hierarchical cluster analysis of DEPs
a: The TMT ratios for PEC, SEM and CE using internal reference (REF) as control; b: The clusters (expression pattern) that proteins are ascribed.
Accession	Accesion in Swissprot	PECa	SEMa	CEa	Protein name	Clusterb
TRINITY_DN53895_c0_g2	O22788	0.172453	0.302855	2.91397	Probable peroxygenase 3	1
TRINITY_DN55626_c0_g1	P07728	0.269718	0.427512	2.54538	Glutelin type-A 1	1
TRINITY_DN49967_c5_g2	P31726	0.148846	0.467998	2.75254	Cystatin-1	1
TRINITY_DN50420_c1_g3	P13853	0.281602	0.460912	2.62814	17.6 kDa class I heat shock protein 3	1
TRINITY_DN49700_c0_g1	A0AT31	0.255902	0.471456	2.60855	Non-specific lipid-transfer protein 5	1
TRINITY_DN45030_c0_g1	Q8VZW3	0.297592	0.490769	2.61314	Probable chalcone-flavonone isomerase 3	1
TRINITY_DN55550_c1_g2	Q5XLY0	0.264513	0.496662	2.62553	Putative anthocyanidin reductase	1
TRINITY_DN52140_c1_g1	P15590	0.287074	0.498106	2.5957	Globulin-1 S allele	1
TRINITY_DN49561_c1_g5	P27880	0.329424	0.519651	2.49845	18.2 kDa class I heat shock protein	1
TRINITY_DN55550_c1_g2	Q5XLY0	0.300957	0.562697	2.47968	Putative anthocyanidin reductase	1
TRINITY_DN53233_c1_g2	Q9LT96	0.2044	0.584429	2.57024	Probable leucine-rich repeat receptor-like protein kinase	1
TRINITY_DN55550_c1_g2	Q5XLY0	0.242764	0.582526	2.53647	Putative anthocyanidin reductase	1
TRINITY_DN54757_c0_g5	P19242	0.354985	0.591993	2.2855	17.1 kDa class II heat shock protein	1
TRINITY_DN55262_c0_g1	Q948P6	0.263285	0.710542	2.45464	Ferritin-3	1
TRINITY_DN54757_c0_g5	P19242	0.418808	0.668178	2.17028	17.1 kDa class II heat shock protein	1
TRINITY_DN52264_c0_g2	Q96418	0.347239	0.711253	2.24615	Flavonoid 3,5-hydroxylase	1
TRINITY_DN46230_c0_g1	Q93VR4	0.434715	0.691542	2.11257	MLP-like protein 423	1
TRINITY_DN43341_c0_g1	Q9LHI0	0.413369	0.719075	2.1686	NADH dehydrogenase [ubiquinone] 1 alpha subcomplex subunit 6	1
TRINITY_DN54886_c1_g1	P20075	0.262102	0.795724	2.2776	Embryonic protein DC-8	1
TRINITY_DN54886_c1_g1	P20075	0.330326	0.81186	2.26371	Embryonic protein DC-8	1
TRINITY_DN39891_c0_g1	P17815	0.446419	0.762962	2.04397	Malate synthase	1
TRINITY_DN50542_c2_g4	O81644	0.451831	0.791569	2.0775	Villin-2	1
TRINITY_DN48242_c0_g2	Q41951	0.321217	0.837799	2.14875	Aquaporin TIP2-1	1
TRINITY_DN48451_c0_g2	Q9ZWR1	0.433436	0.793383	2.00138	Chalcone-flavonone isomerase	1
TRINITY_DN51414_c1_g3	P42761	0.416837	0.816672	2.02325	Glutathione S-transferase F10	1
TRINITY_DN52264_c0_g5	P48419	0.514091	0.789212	1.93328	Flavonoid 3,5-hydroxylase 2	1
TRINITY_DN45700_c1_g2	Q94A32	0.426277	0.837454	2.0225	Protein fatty acid export 2	1
TRINITY_DN52414_c0_g3	Q9LL41	0.457297	0.823686	1.97167	Isoflavone reductase homolog pcber	1
TRINITY_DN55276_c0_g7	Q6Z965	0.381296	0.868091	2.07324	12-oxophytodienoate reductase 7	1
TRINITY_DN49002_c0_g1	A0AT33	0.271062	0.907176	2.11456	Non-specific lipid-transfer protein 4	1
TRINITY_DN53290_c1_g2	Q42521	0.466893	0.813144	1.89473	Glutamate decarboxylase 1	1
TRINITY_DN52385_c2_g3	Q9SK09	0.309793	0.903928	2.1046	Vicilin-like seed storage protein	1
TRINITY_DN47422_c0_g1	Q5KTS5	0.414639	0.928319	2.14635	Glucose and ribitol dehydrogenase	1
TRINITY_DN50267_c0_g1	P52410	0.354174	0.894403	2.04942	3-oxoacyl-[acyl-carrier-protein] synthase I	1
TRINITY_DN51052_c1_g5	A2XAZ3	0.363003	0.938027	2.04571	Alcohol dehydrogenase class-3	1
TRINITY_DN46857_c0_g1	Q9SYX1	0.386584	0.907046	1.96852	Light-harvesting complex-like protein 3 isotype 1	1
TRINITY_DN47040_c0_g1	Q43804	0.359161	1.02366	2.17155	Oleosin 1	1
TRINITY_DN53153_c1_g1	Q8LNZ5	0.5232	0.86146	1.81561	Probable xyloglucan endotransglucosylase/hydrolase protein B	1
TRINITY_DN55842_c5_g1	Q9ZVY7	0.205918	1.01381	2.12755	Oil body-associated protein 1A	1
TRINITY_DN49700_c0_g1	A0AT31	0.320565	0.986548	2.0594	Non-specific lipid-transfer protein	1
TRINITY_DN41269_c0_g1	Q94C12	0.525268	0.826608	1.68604	NADH dehydrogenase [ubiquinone] 1 beta subcomplex subunit 10-B	1
TRINITY_DN52071_c2_g2	Q07764	0.252993	0.966168	1.95433	Protein HVA22	1
TRINITY_DN51394_c0_g2	Q9ZSK5	0.430965	0.95017	1.9123	Zeatin O-glucosyltransferase	1
TRINITY_DN49225_c0_g1	Q93YR2	0.282764	1.00749	2.00762	Probable sodium/metabolite cotransporter BASS1	1
TRINITY_DN55923_c4_g3	Q9LZ06	0.574861	0.877694	1.74105	Glutathione S-transferase L3	1
TRINITY_DN44317_c0_g1	Q9LIG0	0.486371	0.928496	1.82786	Clavaminate synthase-like protein	1
TRINITY_DN55975_c6_g1	P23901	0.313646	1.02739	2.0103	Aldose reductase	1
TRINITY_DN50326_c1_g1	Q9LV33	0.579367	0.873814	1.70639	Beta-glucosidase 44	1
TRINITY_DN47886_c0_g2	Q75LR2	0.487668	0.918678	1.78479	Phospho-2-dehydro-3-deoxyheptonate aldolase 1	1
TRINITY_DN53055_c1_g1	Q8H0X6	0.415709	0.981076	1.90102	Cysteine proteinase inhibitor 6	1
TRINITY_DN54798_c1_g4	O80796	0.54819	0.904661	1.74425	Membrane-associated protein VIPP1	1
TRINITY_DN48078_c0_g1	O65258	0.396199	0.990786	1.89171	Beta-amylase 2	1
TRINITY_DN49301_c0_g1	Q8W4L0	0.517957	0.933421	1.77295	Probable calcium-binding protein CML49	1
TRINITY_DN48899_c0_g1	Q0WMZ5	0.287791	1.01355	1.90653	Outer envelope pore protein 16-2	1
TRINITY_DN52977_c0_g2	Q69S39	0.461022	0.956119	1.79124	Cytochrome b6-f complex iron-sulfur subunit	1
TRINITY_DN47708_c0_g2	Q9SAK4	0.366083	1.02473	1.89751	Succinate-semialdehyde dehydrogenase	1
TRINITY_DN53844_c0_g1	F4JNX2	0.324821	1.03054	1.88198	Senescence/dehydration-associated protein	1
TRINITY_DN38865_c0_g1	F4IW47	0.508016	0.988104	1.78928	Transketolase-2, chloroplastic	1
TRINITY_DN54921_c1_g2	Q39613	0.468369	0.980179	1.77175	Peptidyl-prolyl cis-trans isomerase	1
TRINITY_DN38085_c0_g1	Q9LJ97	0.485356	0.995346	1.7783	Late embryogenesis abundant protein 31	1
TRINITY_DN53379_c0_g4	P32811	0.436718	1.00875	1.78029	Alpha-glucan phosphorylase, H isozyme	1
TRINITY_DN55975_c6_g1	P23901	0.55373	1.00242	1.76387	Aldose reductase	1
TRINITY_DN56059_c2_g2	P14674	0.539186	0.878114	1.54216	Alcohol dehydrogenase 2	1
TRINITY_DN8184_c0_g1	F4HT41	0.41703	1.04475	1.81575	Probable S-adenosylmethionine carrier 2	1
TRINITY_DN55254_c0_g4	B4FF80	0.566516	0.963586	1.66941	Cell number regulator 5	1
TRINITY_DN53636_c0_g1	Q8W3P8	0.4991	1.00671	1.73639	Abscisate beta-glucosyltransferase	1
TRINITY_DN54537_c1_g6	Q9ZQ97	0.54574	0.985283	1.69397	UDP-glycosyltransferase 73C4	1
TRINITY_DN55765_c0_g1	Q96543	0.37855	1.06364	1.8239	Oleosin 16 kDa	1
TRINITY_DN41450_c0_g1	Q05212	0.533485	0.996508	1.70276	DNA damage-repair/toleration protein DRT102	1
TRINITY_DN51699_c0_g1	Q9SYM5	0.446156	1.02772	1.74763	Trifunctional UDP-glucose 4,6-dehydratase/UDP-4-keto-6-deoxy-D-glucose 3,5-epimerase/UDP-4-keto-L-rhamnose-reductase RHM1	1
TRINITY_DN51478_c0_g2	Q9C7N3	0.263869	1.19625	1.9856	Oil body-associated protein 2C	1
TRINITY_DN44776_c1_g1	Q8LGG8	0.61884	0.957264	1.58701	Universal stress protein A-like protein	1
TRINITY_DN51718_c0_g2	P46256	0.513519	1.01694	1.68385	Fructose-bisphosphate aldolase	1
TRINITY_DN55759_c2_g1	Q9SUV1	0.47771	1.05348	1.73602	Adenine nucleotide transporter BT1	1
TRINITY_DN50693_c0_g1	O22711	0.604478	0.983557	1.60801	Peroxiredoxin-2D	1
TRINITY_DN46985_c0_g1	A2ZW16	0.292629	1.14987	1.85623	Phospholipase A1-II 1	1
TRINITY_DN51262_c3_g1	Q9SMZ4	0.318679	1.10354	1.78136	Alpha-aminoadipic semialdehyde synthase	1
TRINITY_DN50611_c1_g2	Q07469	0.276191	1.13784	1.83148	Bark storage protein A	1
TRINITY_DN53864_c0_g1	A9TF79	0.42412	1.14201	1.81664	Serine/threonine-protein kinase SRK2A	1
TRINITY_DN54969_c0_g1	Q9SWB4	0.339985	1.13299	1.80058	Poly [ADP-ribose] polymerase 3	1
TRINITY_DN50564_c1_g1	Q8H965	0.563072	1.01505	1.58925	Non-specific phospholipase C6	1
TRINITY_DN54013_c0_g1	Q1SGF1	0.464093	1.08327	1.69605	Putative poly [ADP-ribose] polymerase 3	1
TRINITY_DN51612_c2_g3	G3FIN8	0.562636	1.04987	1.62643	Linamarin synthase 1	1
TRINITY_DN49222_c6_g4	Q8GUN2	0.653665	0.988702	1.53051	Adenylylsulfatase HINT1	1
TRINITY_DN50684_c2_g3	P52903	0.422958	1.11845	1.72495	Pyruvate dehydrogenase E1 component subunit alpha	1
TRINITY_DN54799_c0_g2	P42654	0.624616	1.00563	1.54177	14-3-3-like protein B	1
TRINITY_DN54673_c1_g1	Q43784	0.283786	1.1919	1.79942	Granule-bound starch synthase 1	1
TRINITY_DN51672_c2_g5	Q8LK61	0.540463	1.09117	1.63971	NADP-dependent glyceraldehyde-3-phosphate dehydrogenase	1
TRINITY_DN46161_c0_g1	Q9CA67	0.553799	1.09988	1.65229	Geranylgeranyl diphosphate reductase	1
TRINITY_DN48715_c0_g4	P22242	0.473011	1.05666	1.5862	Desiccation-related protein PCC13-62	1
TRINITY_DN51412_c1_g2	Q6ZCX3	0.826075	1.35287	0.899906	Formin-like protein 6	2
TRINITY_DN48070_c0_g1	O23051	0.65529	1.507	0.993453	Ent-kaurenoic acid oxidase 1	2
TRINITY_DN50480_c0_g1	Q9LT25	0.855895	1.33484	0.863541	Pre-mRNA-processing protein 40C	2
TRINITY_DN52191_c0_g1	O82504	0.823332	1.38684	0.840541	RNA-dependent RNA polymerase 2	2
TRINITY_DN51909_c1_g1	Q7PC88	0.689264	1.52113	0.830039	ABC transporter G family member 31	2
TRINITY_DN45353_c0_g1	C0SQ89	0.822478	1.46161	0.765512	DNA (cytosine-5)-methyltransferase CMT3	2
TRINITY_DN49816_c2_g2	Q6PS57	0.926385	1.42558	0.698118	Cyclin-dependent kinases regulatory subunit 1	2
TRINITY_DN54903_c0_g5	Q8GYM1	0.704282	1.762	0.709888	Glutathione S-transferase U22	2
TRINITY_DN53822_c0_g1	Q43729	1.36968	0.623981	0.940856	Peroxidase 57	3
TRINITY_DN51616_c0_g3	O22287	1.28533	0.660837	1.00111	Mannose-1-phosphate guanylyltransferase 1	3
TRINITY_DN55663_c4_g3	Q9SU63	1.17196	0.729786	1.1067	Aldehyde dehydrogenase family 2 member B4	3
TRINITY_DN53157_c0_g6	Q9FUS9	1.16272	0.701881	1.06594	Glutathione S-transferase U18	3
TRINITY_DN55962_c1_g1	Q9FT97	1.49878	0.542559	0.837003	Alpha-galactosidase 1	3
TRINITY_DN55374_c2_g2	Q9SSM2	1.19897	0.711425	1.10156	(R)-mandelonitrile lyase-like	3
TRINITY_DN53033_c0_g2	Q9FIC8	1.44127	0.567764	0.905092	Germin-like protein subfamily 1 member 16	3
TRINITY_DN49086_c1_g2	Q9SVW8	1.42237	0.578617	0.923015	Plant intracellular Ras-group-related LRR protein 4	3
TRINITY_DN49305_c0_g2	Q3E870	1.19667	0.686607	1.10288	Succinate dehydrogenase subunit 7B	3
TRINITY_DN54516_c0_g4	Q06398	1.33805	0.593785	1.04032	Probable glutathione S-transferase GSTU6	3
TRINITY_DN54866_c0_g1	O81862	1.28276	0.608499	1.0747	Class V chitinase	3
TRINITY_DN53468_c1_g2	P11890	1.12024	0.697537	1.23986	Small heat shock protein	3
TRINITY_DN51270_c1_g1	Q84TH6	1.27518	0.595187	1.06927	Dirigent protein 23	3
TRINITY_DN55374_c2_g2	Q9SSM2	1.2074	0.627982	1.16299	(R)-mandelonitrile lyase-like	3
TRINITY_DN54015_c0_g1	Q96520	1.59664	0.433481	0.805875	Peroxidase 12	3
TRINITY_DN54336_c0_g3	P09887	1.17453	0.640335	1.19803	Small heat shock protein	3
TRINITY_DN55838_c1_g6	Q6YW62	1.36042	0.533864	1.00899	ABC transporter G family member 44	3
TRINITY_DN54454_c1_g4	Q9SDZ9	1.2595	0.548708	1.09909	Purple acid phosphatase 2	3
TRINITY_DN55844_c1_g1	Q9LW63	1.12272	0.639305	1.28512	Putative pentatricopeptide repeat-containing protein	3
TRINITY_DN48503_c0_g2	Q06327	1.17781	0.602747	1.21476	Linoleate 9S-lipoxygenase 1	3
TRINITY_DN51437_c2_g4	P27061	1.01897	0.66259	1.39373	Acid phosphatase 1	3
TRINITY_DN54015_c0_g1	Q96520	1.47821	0.461636	0.996614	Peroxidase 12	3
TRINITY_DN45898_c0_g1	Q9ST02	1.52525	0.421862	0.924384	Nicotianamine aminotransferase A	3
TRINITY_DN50027_c2_g2	Q9C907	1.12945	0.59464	1.3031	Glycerophosphodiester phosphodiesterase GDPD5	3
TRINITY_DN54591_c1_g2	M1T9X3	1.0471	0.564162	1.29191	Isoflavone reductase homolog IRL1	3
TRINITY_DN49298_c1_g1	Q95661	1.04549	0.595267	1.41037	Small heat shock protein	3
TRINITY_DN54857_c0_g5	A7NY33	1.2386	0.519155	1.26663	Peroxidase 4	3
TRINITY_DN49165_c0_g1	Q10S70	1.05049	0.569377	1.49984	Expansin-like A1	3
TRINITY_DN53507_c0_g1	P13917	0.957658	0.547115	1.59223	Basic 7S globulin	3
TRINITY_DN55330_c1_g1	Q7Y1Z0	0.987412	0.361102	1.7076	Chitinase 5	3
TRINITY_DN47879_c0_g1	Q9SGA2	0.692678	0.357958	2.07356	Glycerophosphodiester phosphodiesterase GDPD1	3
TRINITY_DN4269_c0_g1	Q03194	1.5174	0.966124	0.364848	Plasma membrane ATPase 4	4
TRINITY_DN54115_c0_g1	Q9LNE3	1.65049	0.774038	0.30142	Probable fructokinase-2	4
TRINITY_DN55042_c2_g2	Q8VYZ0	1.46697	0.907982	0.387946	E3 ubiquitin-protein ligase ORTHRUS 2	4
TRINITY_DN48680_c0_g2	Q6X7J4	1.55621	0.900679	0.406973	WUSCHEL-related homeobox 9	4
TRINITY_DN55243_c2_g1	Q7XPY2	1.55018	0.895899	0.416465	Plasma membrane ATPase	4
TRINITY_DN49277_c1_g1	Q9SSE9	1.6737	0.746579	0.356553	Lysine-specific demethylase JMJ25	4
TRINITY_DN51276_c0_g6	Q8LD98	1.79457	0.648934	0.351593	NDR1/HIN1-like protein 6	4
TRINITY_DN53066_c0_g1	Q8L7I0	1.96252	0.45915	0.279469	Endoglucanase 19	4
TRINITY_DN50085_c1_g1	Q9ZU91	1.40814	0.931142	0.5669	Glucan endo-1,3-beta-glucosidase 3	4
TRINITY_DN51876_c0_g2	Q53P98	1.48615	0.851106	0.525771	Signal peptide peptidase-like 2	4
TRINITY_DN55305_c1_g10	Q9LHF1	1.75211	0.665	0.414647	Leucine-rich repeat extensin-like protein 4	4
TRINITY_DN51114_c0_g1	Q94II3	1.67599	0.713629	0.448492	Probable methyltransferase PMT21	4
TRINITY_DN53058_c2_g3	O22126	1.83315	0.544531	0.343021	Fasciclin-like arabinogalactan protein 8	4
TRINITY_DN52065_c0_g2	Q8L636	1.69613	0.700193	0.448023	Sodium/calcium exchanger NCL	4
TRINITY_DN51020_c1_g1	Q8GSM7	1.45711	0.849515	0.548313	Shikimate O-hydroxycinnamoyltransferase	4
TRINITY_DN53262_c2_g1	A9NUH8	1.38891	0.920892	0.59441	S-adenosylmethionine synthase 1	4
TRINITY_DN53565_c0_g1	A2CIR5	1.61576	0.754589	0.498365	Ankyrin repeat-containing protein NPR4	4
TRINITY_DN54966_c0_g1	Q9S9K4	1.50865	0.85999	0.568397	Aspartic proteinase-like protein 2	4
TRINITY_DN54502_c0_g1	P21616	1.56267	0.736246	0.489858	Pyrophosphate-energized vacuolar membrane proton pump	4
TRINITY_DN50773_c1_g2	P46519	1.41946	0.882843	0.587409	Desiccation protectant protein Lea14 homolog	4
TRINITY_DN51061_c2_g1	Q9LE59	1.37396	0.915347	0.612458	Polygalacturonate 4-alpha-galacturonosyltransferase	4
