# Supplementary material for: Large-Scale Quantitative Proteomic Analysis during Different Stages of Somatic Embryogenesis in Larix olgensis
Source: Curr Issues Mol Biol. 2023 Mar 1;45(3):2021–34. doi: 10.3390/cimb45030130 (PMC10047913; doi:10.3390/cimb45030130)
Supplement: Supplementary file 1 [file cimb-45-00130-s001.zip › Table S4-Correlation analyses.xlsx]

## Sheet: Table S4
Table S4 Correlation analyses between transcripts and quantifiable proteins or DEPs in the SEM vs. PEC, CE vs. SEM, and CE vs. PEC comparison groups
Comparison group	Type	Number of proteins	Number of transcripts	Number of proteins with a corresponding transcript
SEM vs. PEC	Quantifiable	6243	74334	6225
SEM vs. PEC	Significant differences	1996	9422	674
CE vs. SEM	Quantifiable	6243	72983	6223
CE vs. SEM	Significant differences	1722	6114	295
CE vs. PEC	Quantifiable	6242	80892	6240
CE vs. PEC	Significant differences	3393	11763	1013
